# Supplementary material
Source: PubMed Central journal article supplement (PMC6679942)
Supplement: NIHMS1034049-supplement-Supplementary_Information.pdf [file NIHMS1034049-supplement-Supplementary_Information.pdf]

# Automated Sequence Design of 3D Polyhedral Wireframe DNA Origami with Honeycomb Edges

## *Supporting Information*

*Hyungmin Jun,<sup>†,‡</sup> Tyson R. Shepherd,<sup>†,‡</sup> Kaiming Zhang,<sup>†,§</sup> William P. Bricker,<sup>‡</sup> Shanshan Li,<sup>§</sup> Wah Chiu,<sup>§,¶</sup> Mark Bathe<sup>\*,‡</sup>*

<sup>‡</sup>Department of Biological Engineering, Massachusetts Institute of Technology, Cambridge, MA 02139, USA

<sup>§</sup>Department of Bioengineering, Microbiology and Immunology, and James H. Clark Center, Stanford University, Stanford, CA 94305, USA

<sup>¶</sup>SLAC National Accelerator Laboratory, Stanford University, Menlo Park, CA 94025 USA

## **S1 Design algorithm**

### **S1.1 Top-down sequence design software**

The fully automatic inverse design procedure TALOS (Three-dimensional, Algorithmically-generated Library of DNA Origami Shapes) is available for use as open source software (<http://github.com/lcbb/talos>) and online at <http://talos-dna-origami.org>. Details for compiling the source code can be found in the documentation provided with the software.

### **S1.2 User-specified geometric input**

The goal of this work is to design and synthesize wireframe polyhedral scaffolded DNA origami structures with edges composed of six-helix bundles (6HB),<sup>1</sup> which is a molecular complex consisting of a cyclic configuration of six duplexes on a honeycomb lattice covalently attached using antiparallel double crossovers. Given a target 3D polyhedral structure of specified size and geometry (Figure S19), the algorithm will route a single-stranded scaffold throughout the entire geometry with 6HB edges and generate the required staple strands needed to experimentally fold the structure (Figures S20-S27 and Tables S8-S16). 3D geometries are specified using a closed surface that is discretized using a polyhedral mesh (Figure S1a). In order to specify the geometry for scaffold routing, the spatial coordinates of all vertices and faces to which these vertices belong must be provided (Figure S1b). These may be provided manually or through an ASCII file format that defines the polygonal geometry, such as the Polygon File Format (PLY), STereoLithography (STL), or Virtual Reality Modeling Language (WRL). As explained in more detail below, any closed, 3D surface geometry can serve as input to the algorithm.

### **S1.3 Generating 6HB duplex segments from the wireframe model**

To generate six line segments per each wireframe edge, representative of the six duplexes in the 6HB, each wireframe edge is detached from the wireframe vertices and its length is shortened (Figure S1c) with the offset-distance (between the vertex and the end point of the adjusted line segment) calculated with respect to the minimum angle between any two adjacent edges at a vertex and according to that vertex's degree to eliminate steric hindrance in the final structure. Then, at the center of every separated line, three basis vectors  $\mathbf{t}_1$ - $\mathbf{t}_2$ - $\mathbf{t}_3$  of the local coordinate system are introduced to determine the orientation of the 6HB along the wireframe edge. The local vector  $\mathbf{t}_1$  (red arrow in Figure S1) is defined by position vectors of two endpoints of each line segment. The direction of the vector  $\mathbf{t}_3$  (olive arrow in Figure S1) is determined by the centers of the two intersecting faces of the wireframe edge and oriented such that the vector starts in the face with the direction of the curl of the face oriented in the same direction as  $\mathbf{t}_1$  and ends in the face with the direction of the curl of the face oriented in the opposite direction as  $\mathbf{t}_1$  (Figure S1d). The local vector  $\mathbf{t}_2$  (blue arrow) is obtained by the cross product of two vectors  $\mathbf{t}_3$  and  $\mathbf{t}_1$ .

Based on the  $\mathbf{t}_3$ - $\mathbf{t}_2$  plane, the cross-section of a honeycomb lattice shape has six circles representative of the six DNA duplexes and each circle has a diameter of 2.25 nm, as assumed previously.<sup>2-4</sup> The integer number (hereafter called a section ID) on each circle is assigned to model the asymmetric ends of DNA strands: even section IDs have 5'-terminal phosphate groups and odd section IDs have 3'-terminal hydroxyl groups orientations of the scaffold strand.

Then, according to the section ID, each separated line is replaced (Figure S1e) with six scaffold segments (blue line) with endpoints. For even number circles, the scaffold segment points from 5' to 3' in the same direction to local vector  $\mathbf{t}_1$ . For odd-numbered circles, the scaffold segment points from 5' to 3' in the opposite direction of  $\mathbf{t}_1$ . The desired minimum edge length is assigned to the shortened line and the other lines are subsequently scaled likewise. The minimum edge length should be a multiple of 21 base pairs (bp) and greater than or equal to 42 bp to have at least two double-crossovers per every edge.

To avoid clashing between neighboring duplexes, which occurs depending on the dihedral angle between two adjacent faces of the structure, two vertex designs are suggested; the inner connection layer (Figure S3a) in which the origin of two local vectors is located at the center of two inner circles (hereafter called reference circles) and the middle connection layer (Figure S3f) in which two middle circles are used as reference circles.

#### **S1.4 Building the loop-crossover structure and two vertex designs**

The next step is to generate the loop-crossover structure as an intermediate process of the scaffold routing. The endpoints of multiple scaffold segments are joined such that every segment becomes part of a loop (Figure S1f). In the flat vertex (FV) case, the endpoint of the scaffold segment located on the reference circle is connected (red line) to the closest endpoint of the neighboring scaffold segment from reference circle by crossing the vertex. Four remaining endpoints are interconnected (blue line) with each other according to the following rule; two endpoints are diagonally connected (Figure S4a) in the inner connection layer and horizontally connected (Figure S4b) in the middle connection layer. Thus, the initial geometry consisting of  $N_F$  faces and  $N_E$  edges introduce  $N_F + 2 \times N_E$  closed loops, where the  $N_F$  loops are generated by the connection through the red line

shown in Figure S4 and the  $2 \times N_E$  loops are generated by the connection of the endpoints by the blue line shown in Figure S4. In the mitered vertex (MV) case, all scaffold segments are covalently connected to segments on the adjacent edge across the vertex, with the algorithm computing the precise length of dsDNA required to extend the duplex without inducing steric hindrance (Figure S2a,b). Thus, joining all scaffold segments with neighboring segments across the vertex results in two more scaffold crossings per 6HB wireframe edge than the FV case. In the MV case,  $4N_F$  closed loops are generated.

To find all scaffold double crossovers between every two neighboring loops, a DNA model to define the position of each nucleotide is introduced. First, the length of scaffold segments that are the part of the scaffold loop is discretized as a multiple of base pair lengths, 0.34 nm that is the length of base-pair rise in the double-helical B-form DNA model. By adopting the conventions of caDNAo, for the inner connection layer, the initial angles pointing the nucleotide of the scaffold (block ID = 0, where the block ID is the base pair position along the length of the 6HB) are set as  $270^\circ$  and  $90^\circ$  (Figure S3b) for the even and odd section IDs, respectively. For the middle connection layer, the initial angles are set as  $30^\circ$  and  $210^\circ$  (Figure S3g) for the even and odd section IDs, respectively. Given the helical periodicity with 21 bp every two turns, there are two possible starting blocks: the prior and posterior block, where the directions of two nucleotides from the reference circles are opposite to each other and nearly the same to the local vector  $\mathbf{t}_3$ . The prior and posterior block are located in the block ID of 3 and 1 for the inner connection layer (Figure S3c), 1 and 11 for the middle connection layer (Figure S3h), respectively, where the nucleotide at the end of the scaffold segment can be connected without any unpaired nucleotides one of the ends of the scaffold if the scaffold segment length is a multiple of 10.5 bp.

Possible staple crossovers are restricted to intersections between the block and every third layer of a stack of planes orthogonal to the helical axes, spaced apart in intervals of 7 bp or two-thirds of a turn<sup>5</sup>. Then, possible scaffold crossovers (red line) are permitted (Figure S3d,i) at positions displaced upstream or downstream of the corresponding possible staple crossover points by 5 bp or a half-turn. For the FV design, because scaffold segments that are not located in reference circle are connected each other without crossing the vertex, all segments are adjusted to where the next single crossover position exists. For the inner connection layer, discretized segments originated from a section ID of 2 or 3 are moved 3 bp on the 3'-end direction and those from a section ID of

4 or 5 are moved 1 bp on the direction of the 5'-end (Figure S3c,d), which is to connect diagonally each other at the permitted position of the scaffold single crossover. For the middle connection layer, all discretized segments except for those from a section ID of 3 are shifted by 1 bp on the 3'-end direction (Figure S3h,i), resulting in each pair of duplexes to be connection through allowable crossover locations based on the dsDNA helix. For the MV design, the connections between two scaffold segments crossing the vertex are accomplished by introducing unpaired nucleotides of the scaffold strand at vertices in order to accommodate 5'- and 3'-end misalignment. The number of unpaired nucleotides is calculated by dividing the distance between two nucleotides by the ssDNA length which is used as the value of 0.42nm to release the tensional stresses for their connections.<sup>6</sup>

To build the loop-crossover structures, possible scaffold crossovers that are 7 bp away from both ends of the discretized segments (faint red line in Figure S3) and the double-crossovers (faint red line in Figure S3) connecting its loop are eliminated (Figure S3d,i). Then, only one double-crossovers (yellow and red line lines in Figure S3) per section 0 to 5 in a zig-zag pattern with respect to the center edge are selected (Figure S3e,j), creating the loop-crossover structure. The scaffold loops with initial scaffold double-crossovers (Figure S1g and Figure S2c) can be projected in 2D as a Schlegel diagram (Figure S1h and Figure S2e), in which  $N_F+2\times N_E-1$  (for the FV) or  $4N_F-1$  (for the MV) double-crossovers among them are selected through the following scaffold route process.

The use of different starting blocks results in the different patterns of scaffold and staple crossovers, which affect the processes, especially, final staple route and sequence design. We adapted and used the posterior block as the starting block in both the inner and middle connection layers since it has more the 14-nt seed dsDNA domains whose presence enhances folding yield (Tables S1 and S2).<sup>7,8</sup>

### **S1.5 Generating the spanning tree of the dual graph**

In routing the single-stranded scaffold through the entire DNA origami structure, the first requirement is to ensure an Eulerian circuit exists.<sup>9</sup> An Eulerian circuit, which is stricter than an Eulerian path, is required because the ends of the scaffold should be adjacent to create a single

scaffold nick. An Eulerian circuit is guaranteed when the degree of every vertex is even. This can be achieved by using an even number of duplexes per edge in the structure; in this work, we have chosen to use six duplexes per edge, each a 6HB. Because the degree of every corner connected by the crossover and loop always remains two (even), it becomes an Eulerian circuit by choosing the proper number of double-crossovers of the loop-crossover structure. Thus, the scaffold routing problem can be solved by computing a spanning tree of the dual graph of the loop-crossover structure, which determines the proper number of double-crossovers without any cycle that is a path of edges and nodes wherein a node is reachable from itself.

For the FV design,  $N_f+2N_e$  closed loops should be connected to each other with  $N_f+2N_e-1$  double-crossovers, implying that the edge is constructed by six duplexes with two or three scaffold double-crossovers which are determined by the spanning tree calculation. In order to consistently select two or three double-crossovers for each edge, the weight factor is assigned (Figure S4a for the inner connection layer and Figure S4b for the middle connection layer) to each double-crossover with the value of 1 for two mandatory double-crossovers (red), the value of 2 for the occasional double-crossover (orange), and the value of 3 for the unwanted double-crossover. Despite having twelve ways to impose the weight factor of the double-crossover connecting two adjacent loops (Figure S4), we chose to adapt pattern #1 for the inner connection layer and pattern #13 for the middle connection layer since the final staples with this pattern include more 14-nt seed dsDNA domains (Tables S1 and S2). These patterns are also applied in the MV design.

Then, the dual graph of the loop-crossover structure is generated (Figure S1i and Figure S2e), in which each loop becomes represented by a node (black circle in Figure S1 and Figure S2) and each double-crossover becomes represented as an edge (red line in Figure S1 and Figure S2) joining the associated nodes and transferring the assigned weight factor of the double-crossover. Given the dual graph network, Prim's algorithm can be used to find the minimum weight spanning tree (Figure S1j, Figure S2f, Figure S20 and Figure S21) in which  $N_f+2 \times N_e-1$  edges or  $4N_f-1$  edges (cyan line in Figure S1 and Figure S2) are determined with the priority of small weight factor of the edge. The edges that are members of the spanning tree corresponding to the subset of double-crossovers required to complete the Eulerian circuit.

## **S1.6 Inverting the spanning tree and completing scaffold route**

Once the spanning tree of the dual graph network has been determined, the graph is inverted back to the loop-crossover structure only using members of the spanning tree. By choosing a particular subset of double-crossovers in the loop-crossover structure, these discrete loops can be connected to form one continuous circular scaffold through the entire structure. The direction of the circular scaffold is set to have the same direction defined by the corresponding section ID, and the scaffold nick position is chosen to be placed on the duplex far from crossovers and staple nicks, which reveals the final scaffold routing (Figures S1k, Figure S1i, Figure S2g, Figure S2h, Figure S22 and Figure S23).

## **S1.7 Adding staple strands and sequences**

In this step, the staple strands wind in an antiparallel direction around the scaffold can assemble B-form double helices, and the staple sequences can be computed based on complementary Watson-Crick base pairing with the scaffold sequence. First, initial staple paths complementary to the scaffold are assigned (Figure S5a-c) by placing and connecting all permitted staple double-crossovers except for those (dotted orange line) that would be not 5 bp away from a scaffold crossover between the same two helices and not 7 bp away from the both ends of discretized lines in the base pair model. The staples crossing the vertex are connected with a certain number of nucleotides with poly-T bulges where the staple paths do not bind to the scaffold, which serves as to prevent blunt-end stacking. Because a phosphate-phosphate distance of roughly 0.55 nm is known as B-form DNA<sup>10,11</sup>, the number of unpaired nucleotides in the poly-T bulge is calculated by dividing the spatial distance between two nucleotides to be joined by 0.42 nm (a value slightly smaller than 0.55 nm is used to reduce the tension between the connection).<sup>6</sup> Second, the initial staple paths are linearized by placing a nick in the staple at the center of the longest dsDNA domain (green circle of the initial staple #1 shown in Figure S5c) and where it is non-coincident with staple and scaffold crossovers. Lastly, the non-circular staple paths are broken into the user-define staple length (20 to 60 nucleotides long as a default, resulting in usually a mean length of about 40 nucleotides). With design criteria of including at least one 14-nt seed domain per each staple, we suggested and investigated two alternative staple-break rules, one to maximize staple length

(hereafter “maximized length”) and the other to maximize the number of seed domains (hereafter “maximized seed”) (Figure S5d and Figure S6).

Before applying the “maximized length” staple-break rule, the algorithm first determines the size of dsDNA domains of each initial staple from the 5'-end to 3'-end. From the 5', the algorithm moves in the 3' direction to the next dsDNA domain until the distance traveled exceeds the user-defined maximum staple length (60 nt as a default). The algorithm then moves back to the center of the dsDNA domain in the 3' direction until the domain located is longer than or equal to 14-bp length. If the above conditions are satisfied, the backbone nick is placed at the center of the domain to divide the staple into two. The above steps are repeated until the length of the remaining staple is smaller than the user-defined maximum staple length (see Figures S5-S7) The algorithm does not consider the inclusion of the 14-nt seed domain for the staple when breaking it but guarantees the 7 bp length as the minimum length of the dsDNA domain for the segmented staple (Figures S8-S18, Table S3 and Table S4).

For the “maximized seed” staple-break rule, the algorithm is based on the previously suggested staple-break rule<sup>7,8</sup> where backbone nicks are never placed in dsDNA domain longer than 7 bp and nicks are positioned 3 or 4 bp away from crossovers in the 7-bp domain. To apply the above staple-break rule to our staple route design procedure automatically, the searching bar that is initially placed at the 5' end and scans in the 3' direction to the next dsDNA domain until finding the domain that is longer than or equal to the 14-bp length and the distance traveled exceeds the user-defined minimum staple length (20 nt as a default). Then the backbone nick is placed at the center position of the next dsDNA domain regardless its size (Figures S5-S7). In the above rule, the initial staples are broken by considering the presence of the 14-nt seed domain of the staple to be cut, so it is most likely to contain more than one 14-nt seed domain per each staple. However, each broken staple has the potential to include the dsDNA domains with the small size since it does not consider the size of the domain to be broken.

Note that each staple broken by the “maximized length” rule contains the 14-nt seed domain with more than 80% of total staples, which is a slight decrease in percentage than when applying the “maximized seed” rule (Figure S13, Table S3 and Table S4). However, since it does not contain



the weak, small-size domain, we adapted and used the “maximized length” staple-break rule in the staple design process.

With introducing weight factors to choose two or three scaffold crossovers in a consistent way, for the FV design, each edge is rendered (Figure S1m and Figures S8-S12) with one of two possible scaffold and staple routing patterns for every structure. After all staples are segmented (Figure S1m, Figure S2i and Figures S24-S27), each staple is denoted by a vector of numbers, with each value corresponding to the scaffold nucleotide to which it is base-paired. The input or generated scaffold sequence is then used to match base identities (A, T, G, or C) to the corresponding scaffold number assuming Watson-Crick base-pairing. If no sequence is provided, a segment of M13mp18 is used by default if the required scaffold length is less than or equal to 7,249-nt, and a sequence is randomly generated of the required length is greater. Finally, this list of staple sequences is output for synthesis (Tables S8-S16).

### **S1.8 Predicting atomic-level 3D structure and editing staples**

Each base pair is modeled with 0.34 nm axial rise per bp, whose center and three orientations are defined using 3DNA convention.<sup>4</sup> The three orientation vectors point to the major groove, the preferred nucleotide, and along the duplex axis towards the 3' direction of the strand with the preferred nucleotide, respectively. Based on the position and orientation vectors, the atomic-level 3D structure is obtained by four standard reference atomic structures of base pairs A-T, T-A, G-C, and C-G. Each standard reference atomic structure consists of two phosphates, two deoxyriboses, and two paired bases. Thus, an all-atom model is calculated by placing the standard reference atomic structures, using rigid-body translation and rotation, to the positions and orientations of the base pairs (Figures S28-S36).

With the *JSON* file as one of the outputs from the algorithm, the user can edit the staple crossover positions and sequences using the caDNAno software.<sup>5</sup> We provide the guide model which can be loaded in USCF Chimera,<sup>12</sup> which gives the information which edges of the target structure is associated with the which cross-sections of caDNAno representation (Figures S37-S45).

In conclusion, we have demonstrated here an algorithm that automatically generates scaffold routing and staple sequence design of 6HB DNA-NPs from a polyhedral mesh. The algorithm provides advantageous features such as two alternative vertex designs, editing capability for the staple routing and sequences, no use of unpaired scaffold nucleotides for the FV design, at least one continuous dsDNA domain of 14 nt per staple if possible, no less than 4 nt for any dsDNA domains, and vertex staples (connecting two neighboring edges) containing unpaired stretches with poly-T bulges whose length depend on the distance between two nucleotides to be joined. In addition, the automated sequence design includes the following constraints such as edge lengths as multiples of 21 bp, at least two scaffold double-crossovers per edge.

## **S2 Experimental Methods**

### **S2.1 Assembly of 6HB DNA-NPs**

To maximize DNA-NP yield, we varied several conditions important for assembly, including staple-to-scaffold ratio, magnesium and sodium chloride concentration, and time of folding. Folding conditions for the DNA-NPs were tested on tetrahedra of 42-bp and 63-bp edge lengths and an octahedron of 84-bp edge length. To test salt conditions, solutions containing 10 nM full-length M13 scaffold and 400 nM staples in 1× TAE were combined with 0, 2.5, 5, 7.5, 10, 12, or 14 mM MgCl<sub>2</sub> or 0, 25, 50, 100, 150, 200, or 500 mM NaCl and brought up to 50 μL (Figure S46). Structures were annealed in a T100 thermocycler (Bio-Rad) over a 24-hour annealing time (5 min at 95°C, 5 min at 90°C, 5 min at each 0.5°C temperature interval between 85°C and 70°C, and 13.75 min at each 0.5°C intervals between 70°C and 29°C, and 10 min at each 1°C between 29°C and 25°C). To test the staple ratio, in a solution containing 10 nM full-length M13 scaffold in 1× TAE with 100 mM NaCl and 14 mM MgCl<sub>2</sub>, staples were added to final concentrations of 50, 100, 200, 400, 600, and 800 nM individually final concentration, and brought up to 50 μL. Annealing was done as above. To test optimal annealing time, with 50 μL solutions containing 1× TAE with 100 mM NaCl and 14 mM MgCl<sub>2</sub>, 10 nM M13 scaffold and 400 nM staples, annealing times of 12, 18, 24, and 48 hours were tested by increasing the length of time for each 0.5°C step (7.5 min/°C, 11 min/°C, 15 min/°C, and 35 min/°C).

In all cases, folding was initially checked by agarose gel electrophoretic mobility shift assays (EMSA). 20  $\mu$ L of folded sample was combined with 4  $\mu$ L 6 $\times$  loading buffer (NEB), and loaded to a 2% agarose gel with 1 $\times$  TAE and 12.5 mM MgCl<sub>2</sub> and 1 $\times$  SybrSafe (ThermoFisher). Each gel was run at 90V for 5 minutes followed by 65V for 2-4 hours in 1 $\times$  TAE with 12.5 mM MgCl<sub>2</sub>. Gels were run in an ice-chilled water bath. Gels were then visualized under blue light (Figure S48).

Folded DNA-NPs used for subsequent structural studies were folded in a solution of 20 nM scaffold, 600 nM staples, 1 $\times$  TAE, 100 mM NaCl, and 14 mM MgCl<sub>2</sub> and annealed over the course of 24 hours.

Folded DNA-NPs were purified from staples and folding buffer by the use of buffer exchange via spin filter concentrator columns with size 100 kDa MWCO first cleaned with nuclease free water. DNA-NPs were exchanged into buffer composed of 30 mM Tris-HCl pH 8.1 with 100 mM NaCl and 12 mM MgCl<sub>2</sub> by centrifugation at 3000 RPMs for 40 minutes at 20°C and diluted approximately 10-fold and re-concentrated a total of 6 times. PEG-8000 precipitation and size exclusion spin purification (Illustra S300, GE) was also successfully used to purify the folded DNA-NPs.

Dynamic light scattering (DLS) was used to assay the monodispersity of the folded DNA-NPs. A Wyatt DynaPro NanoStar M3300 was used to collect light-scattering data (Figure S49a,b). DNA-NPs were folded and purified as described. Additionally, purified particle solution was filtered by a 0.22 $\mu$ m to remove any large aggregates. DNA-NP concentration was determined by a ThermoFisher NanoDrop 2000, and a final concentration of 10 nM was used to collect the light scattering data. Data was collected at multiple temperatures to assay global particle thermal stability. A Malvern NanoSight NS300 was additionally used to collect light-scattering data on the folded nanoparticles. Folded, purified, and filtered MV tetrahedron of 84-bp edge length and MV octahedron of 84-bp edge length DNA-NPs were diluted to approximately 10 pM concentration and individual particle tracking was used to obtain particle sizes (Figure S49c,d). Movie captures of the light scattering from individual particles are shown in Movies S1 and S2.

Melting curves were generated to assay the thermal stability of the folded DNA-NPs. 20  $\mu$ L of 1 or 5 nM folded and purified DNA-NPs in 30 mM Tris-HCl pH 8.1 with 100 mM NaCl and 12 mM MgCl<sub>2</sub> were incubated with 1 $\times$  SybrGreen I and a QuantStudio 6 (ThermoFisher) was used to

assay thermal stability by observing fluorescence as temperature increased stepwise from 25-90°C in 5-minute increments per 1°C (Figure S50).

## **S2.2 Transmission electron microscopy (TEM)**

The final DNA-NP concentration was approximately 10 nM. Samples were floated to the formvar surface for 1 minute, blotted with ashless Whatman paper #45, stained by 2% uranyl formate with 50mM NaOH for 30 seconds, and blotted dry. Negative stained TEM images were captured using a FEI Tecnai Spirit Transmission Electron Microscope set to 120kV potential (Figure 2g, Figures S51–S54, Figure S58 and Figure S59).

## **S2.3 Cryogenic Electron Microscopy (cryo-EM) and Single particle images processing**

Three microliter of the freshly concentrated DNA nanostructure solution was applied onto the glow-discharged 200-mesh Quantifoil 2/1 grid, blotted for three secs and rapidly frozen in liquid ethane using a Vitrobot Mark IV (FEI). All grids were screened on a JEM2200FS cryo-electron microscope (JEOL) or a Talos Arctica cryo-electron microscope (FEI) operated at 200 kV. And then imaged in the JEOL 3200 cryo-electron microscope (JEOL) or in a Titan Krios cryo-electron microscope (FEI). Micrographs were recorded with a Gatan K2 Summit direct electron detector in counting mode, where each image is composed of 32 individual frames with an exposure time of 8 s and a total dose  $\sim 40$  electrons per  $\text{\AA}^2$ . A total of 96 images for the FV tetrahedron of 84-bp edge length, 119 images for the MV tetrahedron of 84-bp edge length, 724 images for the FV octahedron of 84-bp edge length, 657 images for the MV octahedron of 84-bp edge length and 662 images for the MV tetrahedron of 63-bp edge length were collected (Figures S55–S57 and Figures S60–S64) with a defocus range of  $\sim 1.5$ – $4$   $\mu\text{m}$ . All the images were motion-corrected using MotionCor2.<sup>13</sup> Single-particle image processing and 3D reconstruction was performed (Figures S65–S70 and Movies S3–S6) using the image processing software package EMAN2.<sup>14</sup> All particles were picked manually by *e2boxer.py* in EMAN2. The initial models generated by TALOS software were low pass filtered to 60 $\text{\AA}$  to avoid model bias. The following steps were performed as previously described.<sup>15</sup> A total of 1,669 particles for the FV tetrahedron of 84-bp edge length,

1,092 particles for the MV tetrahedron of 84-bp edge length, 3,308 particles for the FV octahedron of 84-bp edge length, 5,705 particles for the MV octahedron of 84-bp edge length and 2,511 particles for the MV tetrahedron of 63-bp edge length were used for final refinement, applying tetrahedral, tetrahedral, octahedral, octahedral and tetrahedral symmetries, respectively. Resolutions for the final maps were estimated using the 0.143 criterion of the Fourier shell correlation (FSC) curve without any mask. A Gaussian low-pass filter was applied to the final 3D maps displayed in the UCSF Chimera software package.<sup>12</sup> Correlation of each map with its corresponding atomic model is calculated by the UCSF Chimera fitmap function.

### S3 Edge and vertex analysis of 6HB and DX MD trajectories

A geometric approach for analyzing each frame in the MD trajectory of a DX DNA-NP was extended to 6HB DNA-NPs here.<sup>16</sup> In this approach, the 6HB edges are split into sets of two duplexes which are connected at the inner (FV and MV) and outer (MV) vertices. At each inner and outer vertex, two  $M$ -bp DNA duplexes of each edge are connected with a 1-bp offset along the edge direction, resulting in a protruding base pair at each end of the edge. The protruding base pairs are excluded from downstream analysis, and the remaining base pairs of the two-duplex edge are indexed as  $bp_{1,1}, bp_{1,2}, \dots, bp_{1,M-1}, bp_{2,1}, bp_{2,2}, \dots, bp_{2,M-1}$ . The Python package ProDy<sup>17</sup> then computes the geometric center of atoms in each base pair, denoted  $\mathbf{x}_{1,1}, \dots, \mathbf{x}_{2,M-1}$ , and the geometric center of atoms in each pair of base pairs  $(bp_{1,i}, bp_{2,i}), i = 1, 2, \dots, M-1$ , denoted  $\mathbf{c}_i$ . A right-handed orthonormal basis  $(\mathbf{b}_1, \mathbf{b}_2, \mathbf{b}_3)$  is defined using the three principal axes of the point cloud  $\{\mathbf{x}_{1,1}, \dots, \mathbf{x}_{1,M-1}, \mathbf{x}_{2,1}, \dots, \mathbf{x}_{2,M-1}\}$ , in which  $\mathbf{b}_1$  is coincident with the first principal axis and points from  $\mathbf{c}_1$  to  $\mathbf{c}_{M-1}$ ,  $\mathbf{b}_2$  is coincident with the second principal axis and points from  $bp_{1,1}$  to  $bp_{2,1}$ , and  $\mathbf{b}_3$  is coincident with the third principal axis and points outwards of the NP. Next, a  $L$ -bp-long region at the starting end of the edge is selected to define a vector  $\mathbf{a}_1$ , which is coincident with the first principal axis of the point clouds  $\{\mathbf{c}_1, \dots, \mathbf{c}_L\}$ , and points from  $\mathbf{c}_1$  to  $\mathbf{c}_L$ . The bow- and twist-angles associated with the left half-edge are computed by projecting  $\mathbf{a}_1$  onto the  $\mathbf{b}_3$ - $\mathbf{b}_1$  plane and the  $\mathbf{b}_1$ - $\mathbf{b}_2$  plane as  $\mathbf{a}_{1, \text{bow}}$  and  $\mathbf{a}_{1, \text{twist}}$ , respectively. The bow-angle is defined as the right-handed rotation angle from  $\mathbf{a}_{1, \text{bow}}$  to  $\mathbf{b}_1$  about  $\mathbf{b}_2$ , and the twist-angle as the right-handed rotation angle from  $\mathbf{b}_1$  to  $\mathbf{a}_{1, \text{twist}}$  about  $\mathbf{b}_3$ . This geometric approach allows calculation of two properties of

an  $N$ -arm vertex in each frame: average bow-angle,  $\Psi$ , and average twist-angle,  $\Theta$ . Finally, the bow- and twist-angles are averaged over the  $N$  half-edges that are directly connected to the vertex. Edge and vertex properties are shown in detail for the FV 6HB tetrahedron (Figure S72), the MV 6HB tetrahedron (Figure S73 and Figure S74), and the DX tetrahedron (Figure S75), all with 42-bp edge lengths and simulated using all-atom MD (Movies S7-S9).

## Reference

- (1) Mathieu, F.; Liao, S.; Kopatsch, J.; Wang, T.; Mao, C.; Seeman, N. C. Six-Helix Bundles Designed from DNA. *Nano Lett.* **2005**, *5*, 661–665.
- (2) Dietz, H.; Douglas, S. M.; Shih, W. M. Folding DNA into Twisted and Curved Nanoscale Shapes. *Science* **2009**, *325*, 725–730.
- (3) Castro, C. E.; Kilchherr, F.; Kim, D.-N.; Shiao, E. L.; Wauer, T.; Wortmann, P.; Bathe, M.; Dietz, H. A Primer to Scaffolded DNA Origami. *Nat. Methods* **2011**, *8*, 221–229.
- (4) Pan, K.; Kim, D.-N.; Zhang, F.; Adendorff, M. R.; Yan, H.; Bathe, M. Lattice-Free Prediction of Three-Dimensional Structure of Programmed DNA Assemblies. *Nat. Commun.* **2014**, *5*, 5578.
- (5) Douglas, S. M.; Marblestone, A. H.; Teerapittayanon, S.; Vazquez, A.; Church, G. M.; Shih, W. M. Rapid Prototyping of 3D DNA-Origami Shapes with CaDNano. *Nucleic Acids Res.* **2009**, *37*, 5001–5006.
- (6) Jun, H.; Zhang, F.; Shepherd, T.; Ratanalert, S.; Qi, X.; Yan, H.; Bathe, M. Autonomously Designed Free-Form 2D DNA Origami. *Sci. Adv.* **2019**, *5*, eaav0655.
- (7) Ke, Y.; Bellot, G.; Voigt, N. V.; Fradkov, E.; Shih, W. M. Two Design Strategies for Enhancement of Multilayer–DNA-Origami Folding: Underwinding for Specific Intercalator Rescue and Staple-Break Positioning. *Chem. Sci.* **2012**, *3*, 2587–2597.
- (8) Martin, T. G.; Dietz, H. Magnesium-Free Self-Assembly of Multi-Layer DNA Objects. *Nat. Commun.* **2012**, *3*, 1103.
- (9) Ellis-Monaghan, J. A.; McDowell, A.; Moffatt, I.; Pangborn, G. DNA Origami and the Complexity of Eulerian Circuits with Turning Costs. *Nat. Comput.* **2015**, *14*, 491–503.
- (10) Rich, A. The Rise of Single-Molecule DNA Biochemistry. *Proc. Natl. Acad. Sci.* **1998**, *95*, 13999–14000.
- (11) Murphy, M. C.; Rasnik, I.; Cheng, W.; Lohman, T. M.; Ha, T. Probing Single-Stranded DNA Conformational Flexibility Using Fluorescence Spectroscopy. *Biophys. J.* **2004**, *86*, 2530–2537.
- (12) Pettersen, E. F.; Goddard, T. D.; Huang, C. C.; Couch, G. S.; Greenblatt, D. M.; Meng, E. C.; Ferrin, T. E. UCSF Chimera—A Visualization System for Exploratory Research and Analysis. *J. Comput. Chem.* **2004**, *25*, 1605–1612.
- (13) Zheng, S. Q.; Palovcak, E.; Armache, J.-P.; Verba, K. A.; Cheng, Y.; Agard, D. A. MotionCor2: Anisotropic Correction of Beam-Induced Motion for Improved Cryo-Electron Microscopy. *Nat. Methods* **2017**, *14*, 331–332.
- (14) Tang, G.; Peng, L.; Baldwin, P. R.; Mann, D. S.; Jiang, W.; Rees, I.; Ludtke, S. J. EMAN2: An Extensible Image Processing Suite for Electron Microscopy. *J. Struct. Biol.* **2007**, *157*, 38–46.
- (15) Veneziano, R.; Ratanalert, S.; Zhang, K.; Zhang, F.; Yan, H.; Chiu, W.; Bathe, M. Designer Nanoscale DNA Assemblies Programmed from the Top Down. *Science* **2016**, *352*, 1534–1534.
- (16) Pan, K.; Bricker, W. P.; Ratanalert, S.; Bathe, M. Structure and Conformational Dynamics of Scaffolded DNA Origami Nanoparticles. *Nucleic Acids Res.* **2017**, *45*, 6284–6298.
- (17) Bakan, A.; Meireles, L. M.; Bahar, I. ProDy: Protein Dynamics Inferred from Theory and Experiments. *Bioinformatics* **2011**, *27*, 1575–1577.

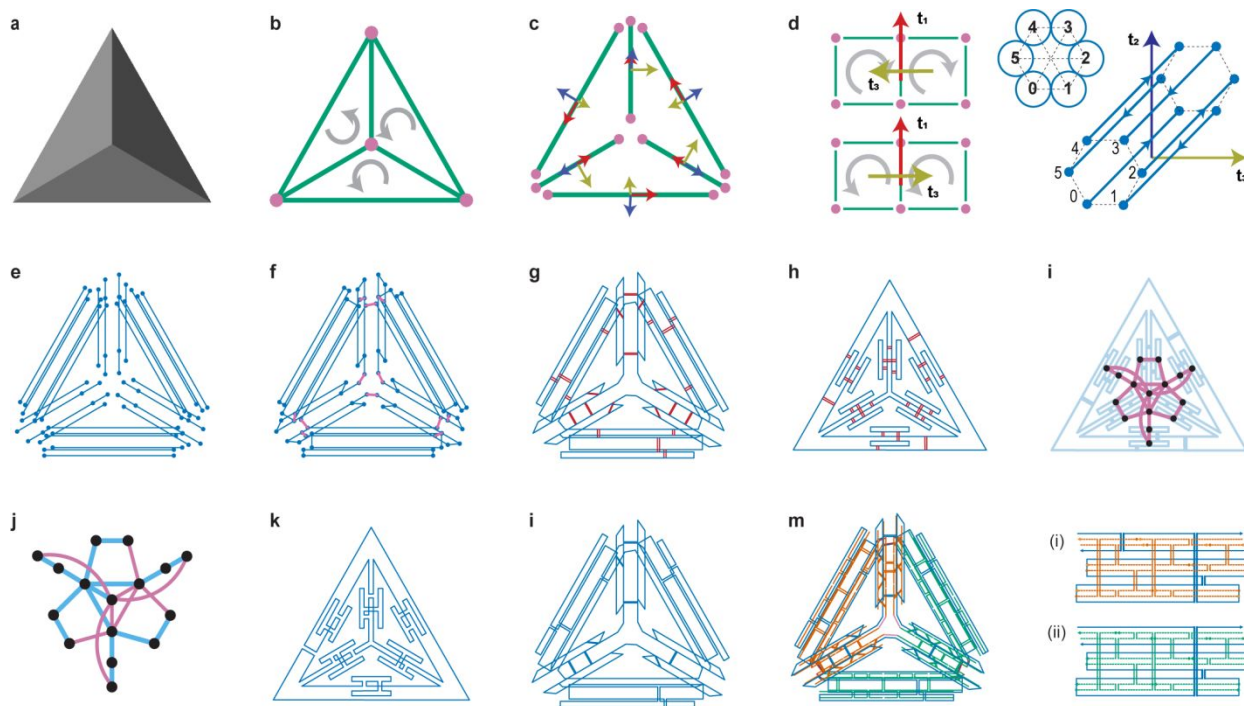

**Figure S1. Schematic illustrating design algorithm for a FV tetrahedron.** (a-b) The polygon mesh file contains information for positions of points and the face connectivity, for this example it consists of the triangular mesh (b) with the consistent orientation. (c) All edges are separated from the vertex associated and the local coordinate system,  $t_1$ - $t_2$ - $t_3$  is introduced at the center of each separated edge. (d) The three vectors are calculated by the direction of two neighboring faces and the interfacing line. Then, the cross-section of the six-helix bundle is defined on the local vectors,  $t_3$ - $t_2$  and the six lines whose direction depends on the cross-section ID (number in circle) are introduced. (e-f) Each separated line is substituted with six scaffold segments and closed loops are generated (f) by connecting endpoints of multiple lines at the vertex. (g) The multiple lines are discretized to represent the base pair, in which the scaffold double-crossovers (red double line) for each two closed loops are introduced. (h-j) The loop-crossover structure is projected in 2D as a Schlegel diagram and converted (i) into the dual graph that is used to compute (j) the spanning tree. (k-i) By inverting (k) the spanning tree to the Schlegel diagram, the scaffold routing is completed (i). (m) Staples are added and sequences are assigned, resulting in two edge routing patterns.



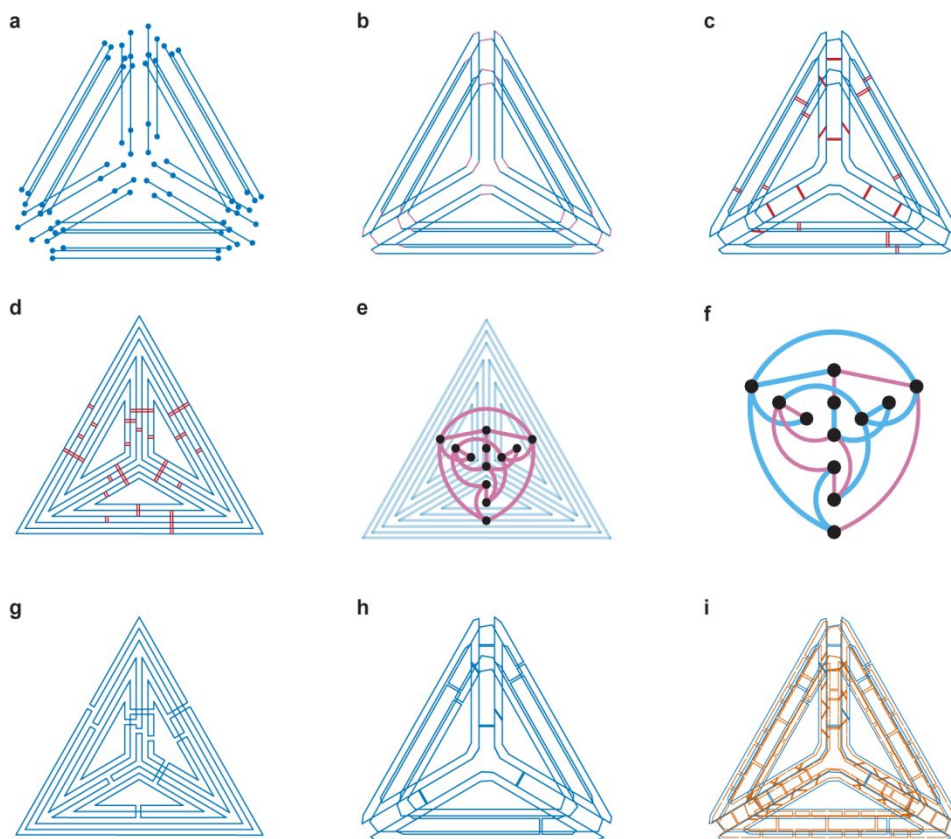

**Figure S2. Schematic illustrating design algorithm for a MV tetrahedron.** (a-b) Line segments are extended to connect their neighboring lines crossing at the vertex and closed loops are formed by connecting endpoints of the each line at the vertex. (c) The multiple lines are discretized to represent the base pair, in which the scaffold double-crossovers (red double line) for each two closed loops are introduced. (d-f) The loop-crossover structure is projected in 2D as a Schlegel diagram and converted (e) into the dual graph that is used to compute (f) the spanning tree. (g-h) By inverting the spanning tree to the Schlegel diagram, the scaffold routing is completed. i, Staples are added and sequences are assigned.

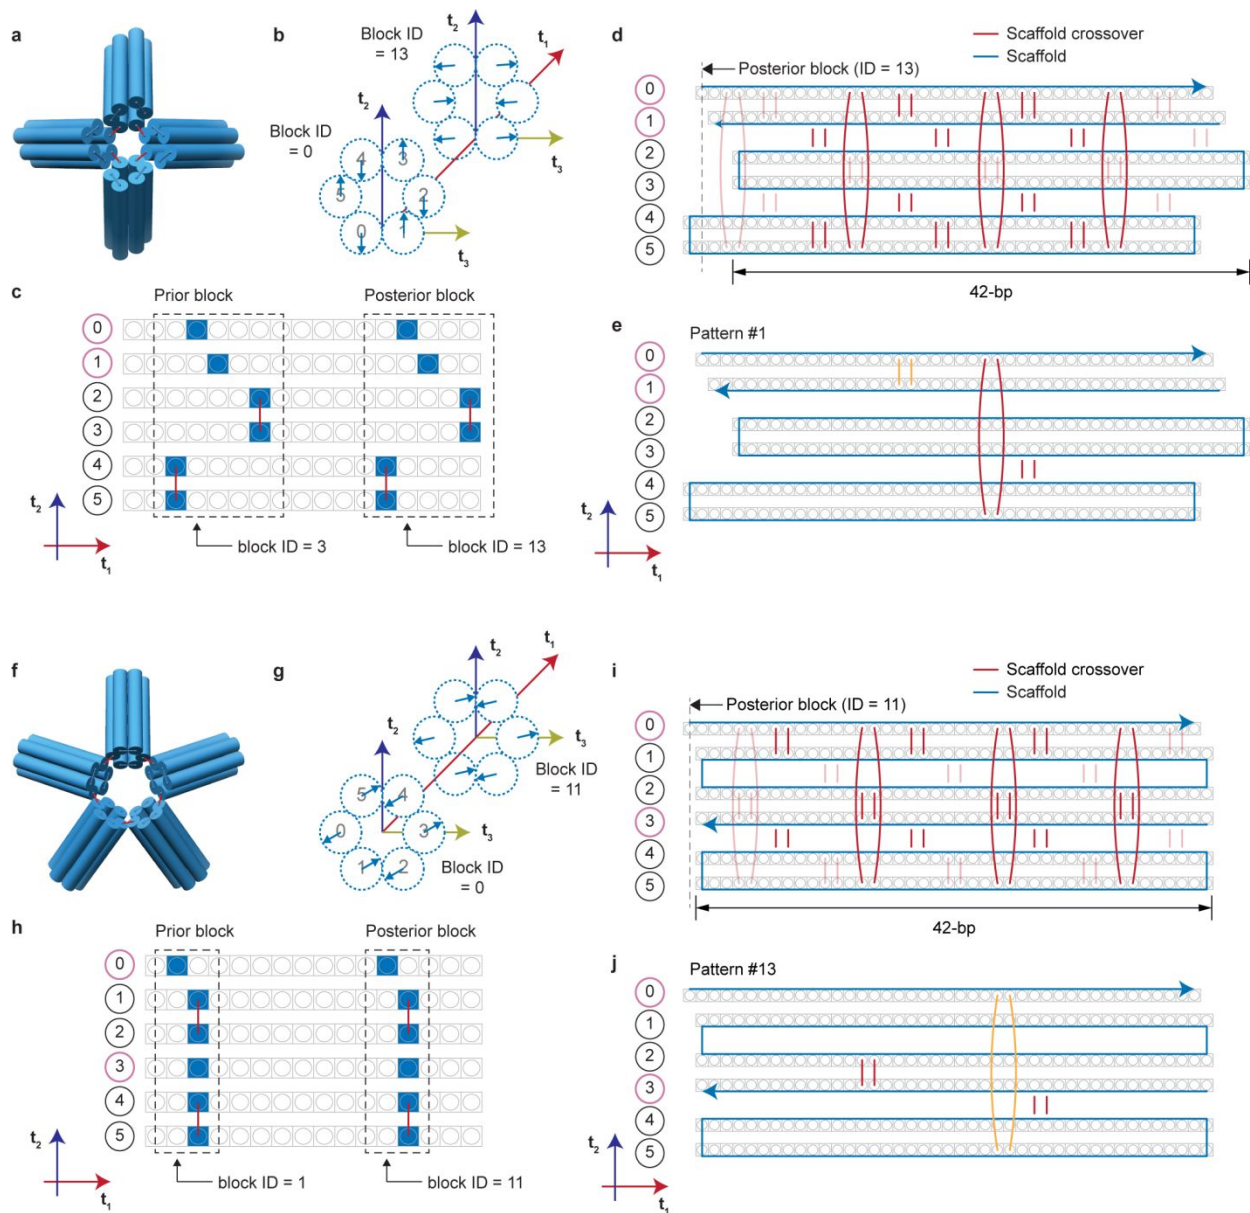

**Figure S3. Initial scaffold crossovers according to the inner and middle connection layer.**

(a-b) In the inner connection layer, the nucleotide at the 5'-end is initially located in the  $270^\circ$  direction for even numbers and  $90^\circ$  direction for odd numbers. The positions of nucleotides are rotated by  $34.28^\circ$  counterclockwise per base pair mean twist (21 base pairs every two turns). (c-d) There are two possible positions to define the 5'-end of the scaffold, prior and posterior block, resulting in different patterns (d) of scaffold possible crossovers (red line) on the edge. The crossover is removed (faint red line) when it is 7-bp away from the end of the line. (e) The only double-crossover between two loops is assigned by a zigzag pattern sequentially from section 1 to

6 and imposed a weight factor (1 for red, 2 for yellow, and 3 for black crossovers) according to weight patterns shown in Figure S4. **(f-g)** For the middle connection layer, the nucleotide of the scaffold is initially located in the  $30^\circ$  direction for even numbers and  $210^\circ$  direction for odd numbers. **(h-j)** Two different block positions also results in the different patterns of scaffold possible crossovers on the edge.

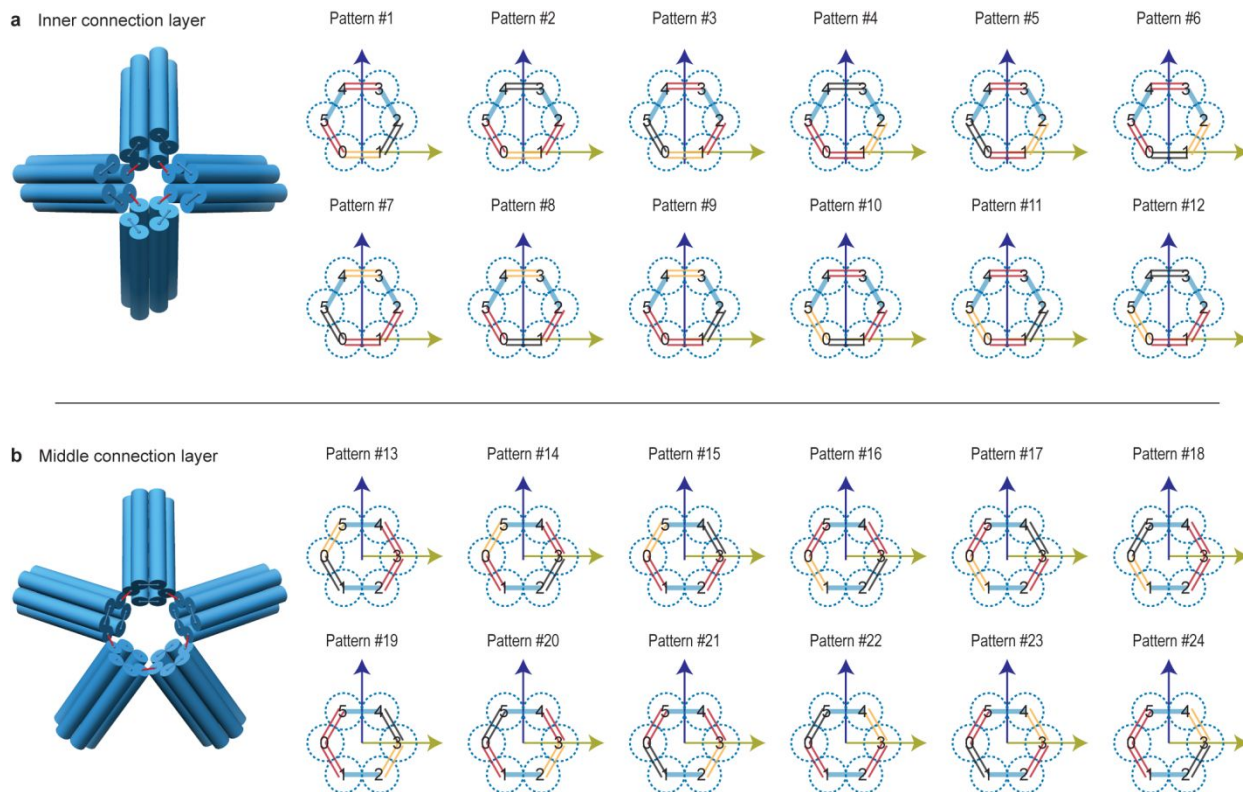

**Figure S4. 12 possible patterns to define the weight factor of the scaffold crossovers for the FV design.** (a-b) The six-circles show the cross-section of the six-helix bundle. Two circles that are located on the  $t_3$  axis are connected to the neighboring circles crossing the vertex. Four possible double-crossovers can be constructed with three different weight factors, resulting in 12 possible patterns for each connection layer. Each edge has at least two double crossovers of scaffold, which is assigned as weight factor of 1 (red double line). The others are assigned as the weight factor of 2 (yellow) or 3 (black), which is algorithmically selected.

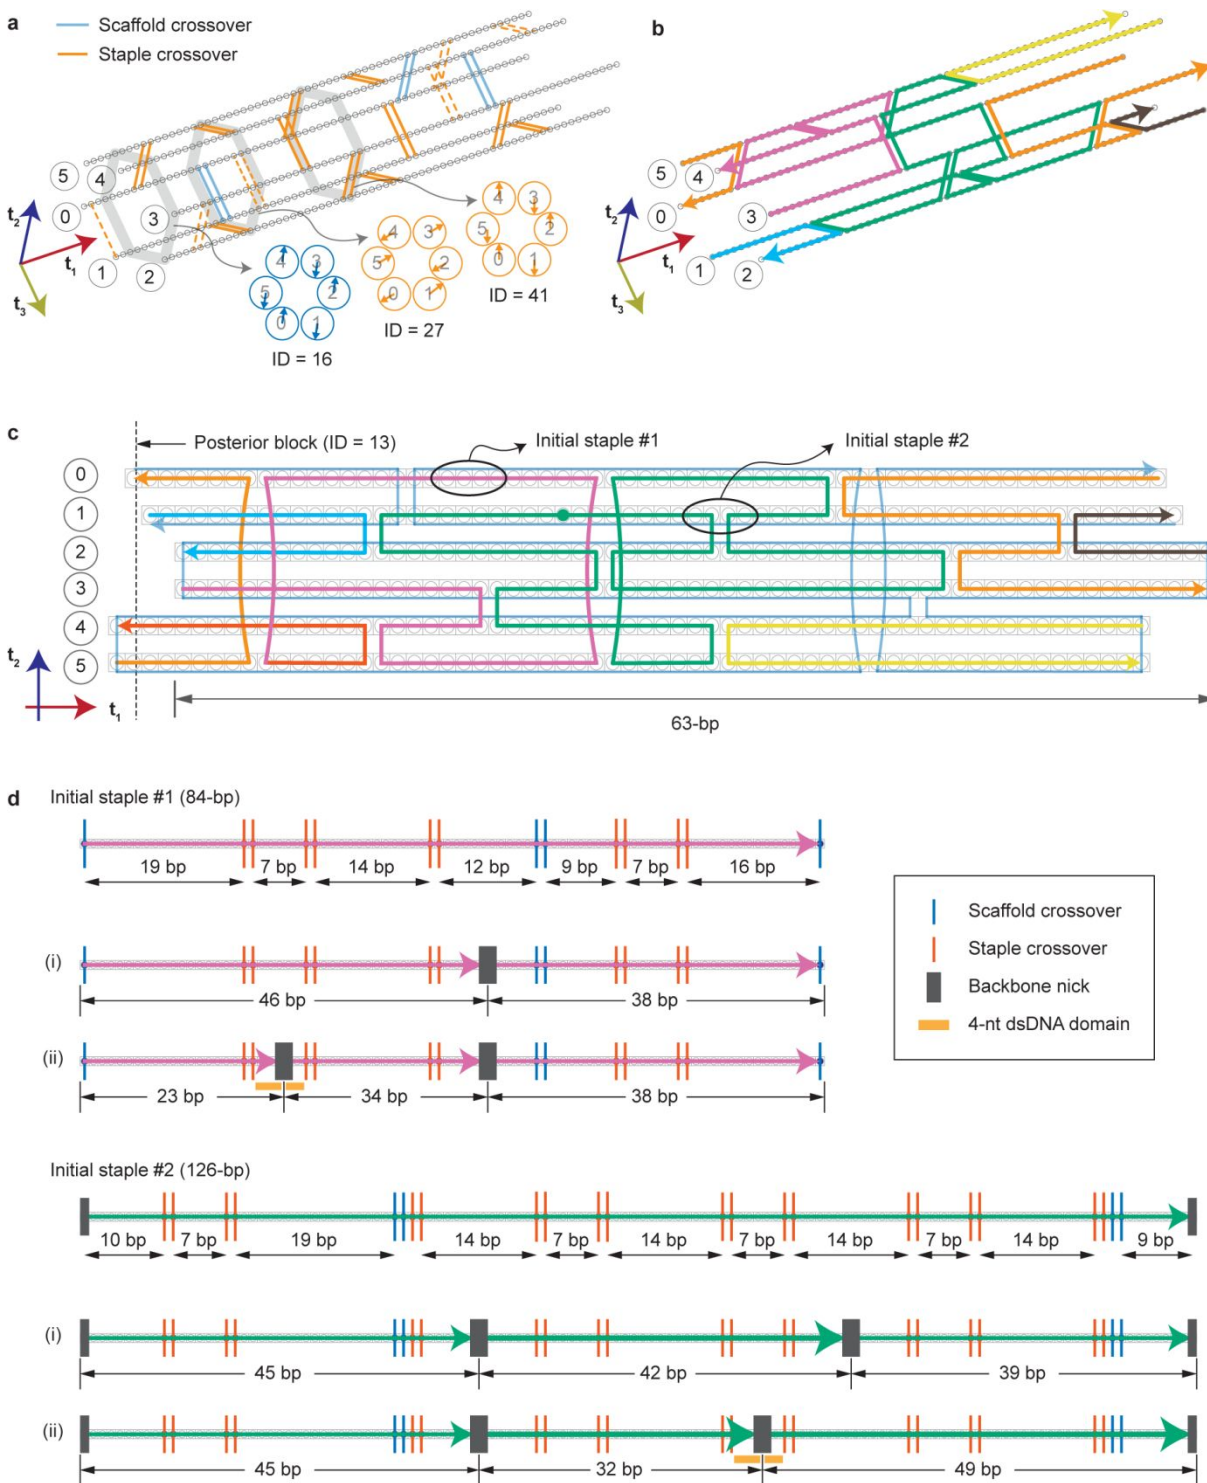

**Figure S5. Schematic illustration of staple routing procedure and two staple-break rules. (a)** Possible staple crossovers (orange line) are assigned in the permitted position except for those (orange dotted line) that would be 5 bp away from a scaffold crossover between the same helices

and 7 bp away from the both ends of discretized lines. The six-circles show the cross-section of the 6HB and the arrow indicates the position of the nucleotide of the scaffold (blue) or staple (orange) according to the block ID. **(b)** Initial staple paths (multiple colored lines) are constructed by connecting assigned possible staple crossovers, which have the orientation (arrow) that is opposite to one of the complementary scaffold. **(c)** In the planar representation of six-helix bundle shown in panel **(b)**, the initial staple #1 (red) and staple #2 (green) have lengths of 84-bp and 126-bp, respectively, which is complementary to scaffold strand (blue). The staple #2 is non-circular, which is broken by the backbone nick (green circle) at the center of the longest dsDNA domain. **(d)** Two staple-break rules of the “maximized staple length” and “maximized the number of seed domains” are applied into the initial staple #1 and #2 to make short staples ranging from 20 bp to 60 bp.

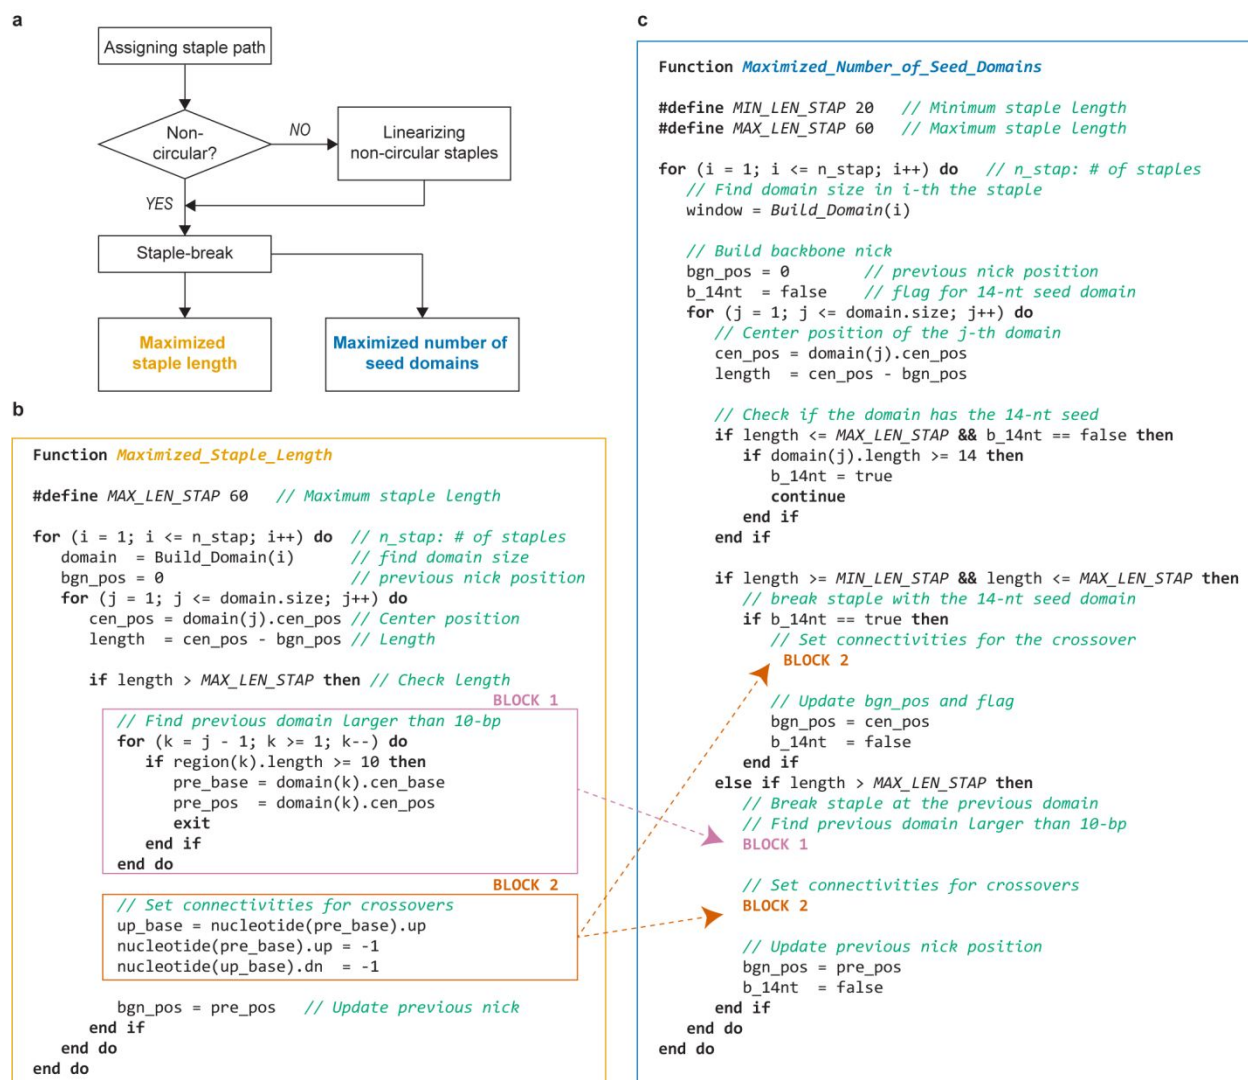

**Figure S6. Procedure to design the staple routing and two algorithms to break the staples ranged from 20 bp to 60 bp. (a)** The staple routing consists of three steps; assigning initial staple path, making non-circular and breaking the initial staple. **(b-c)** Pseudo codes for two staple-break rules, “maximized staple length” **(b)** and “maximized the number of seed domains” **(c)**. Data structures used in algorithms: *domain* – the linked list to save the information on the dsDNA domain of each initial staple; *window(i).length* – the return value of the length of the *i*-th dsDNA domain; *window(i).cen\_pos* – the return value of the center position at *i*-th dsDNA domain; *nucleotides* – vector array to save information on the connectivity of nucleotides; *nucleotide(i).up* – the return value indicating the upper nucleotide ID; *nucleotide(i).dn* – the return value indicating the downward nucleotide ID. Pseudocode does not include exception handling.

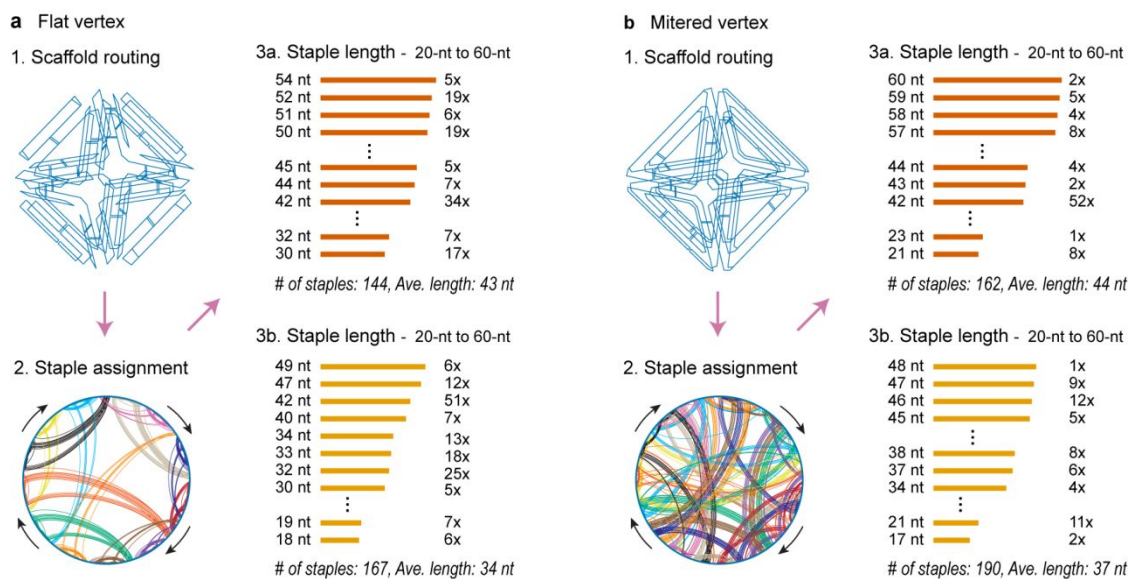

**Figure S7. User defined staple length design.**



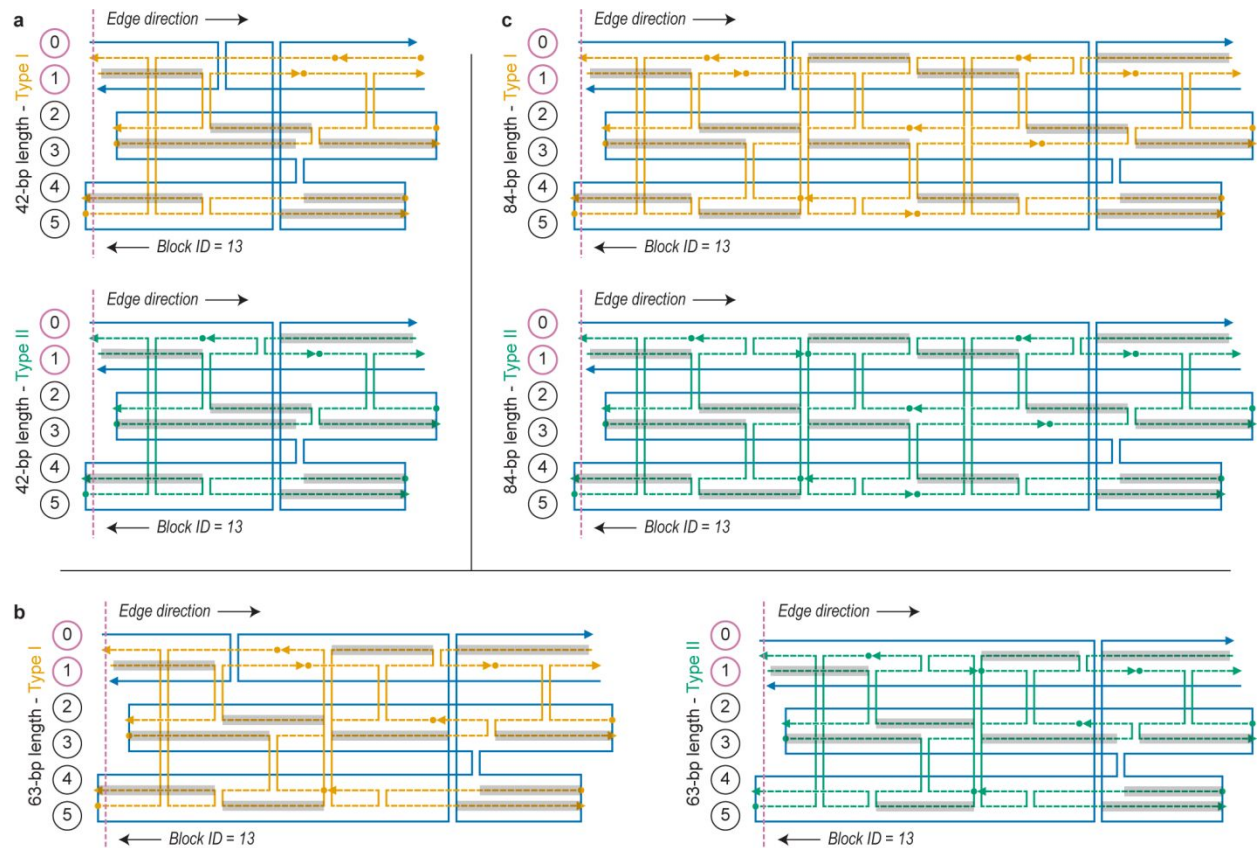

**Figure S8. Edge staple-design for the inner connection layer when the “maximized staple length” breaking rule is used. (a-c) All FV DNA-NPs have only two edge staple-design patterns; type I (orange edge staples with three scaffold double-crossovers) and type II (green edge staples with two scaffold double-crossovers) for 42-bp (a), 63-bp (b) and 84-bp (c) edge length. The blue strand is the part of the M13mp18 scaffold strand. The gray-shaded region represents the 14-nt seed dsDNA domain and arrowheads indicate the 3'-ends of strands.**

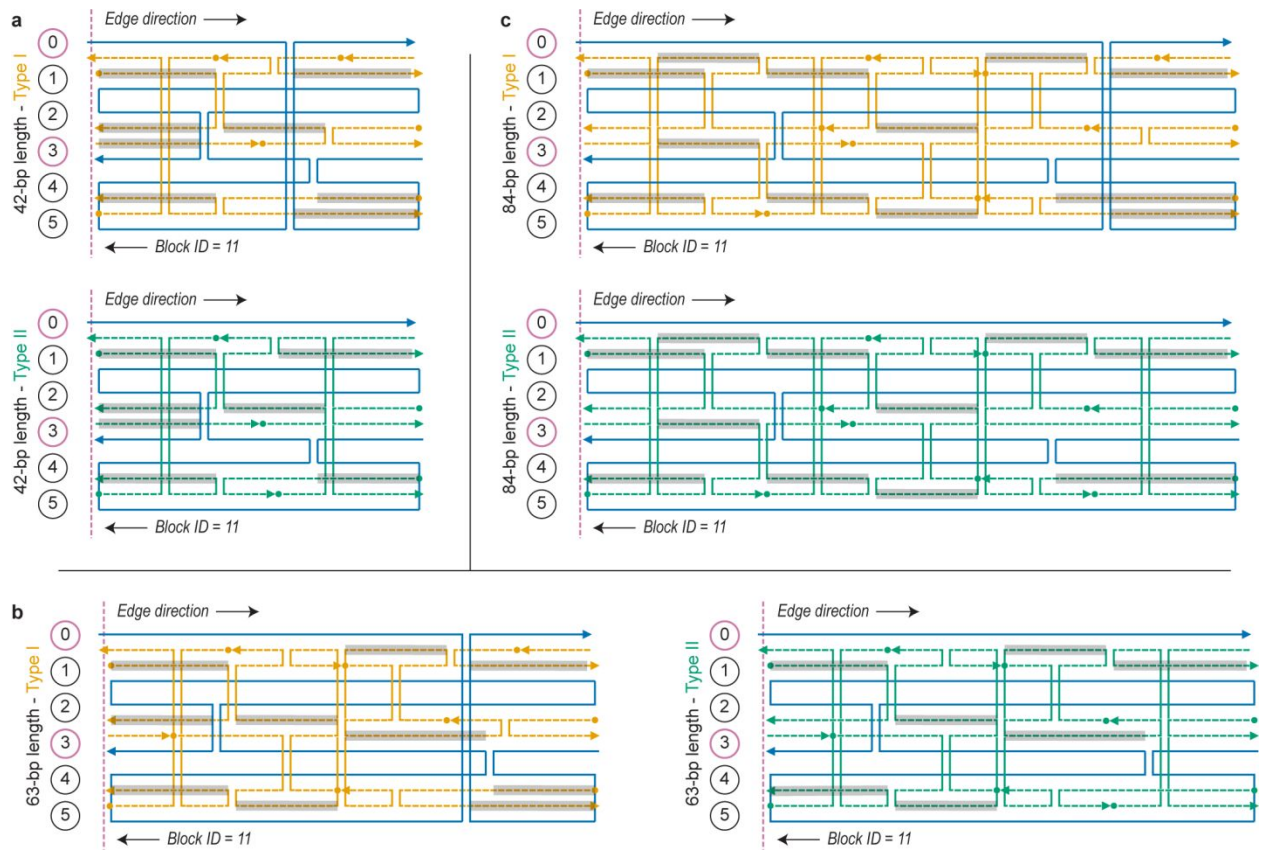

**Figure S9. Edge staple-design for the middle connection layer when the “maximized staple length” breaking rule is used. (a-c) All FV DNA-NPs have only two edge staple-design patterns; type I (orange edge staples with three scaffold double-crossovers) and type II (green edge staples with two scaffold double-crossovers) for 42-bp (a), 63-bp (b) and 84-bp (c) edge length. The blue strand is the part of the M13mp18 scaffold strand. The gray-shaded region represents the 14-nt seed dsDNA domain and arrowheads indicate the 3'-ends of strands.**

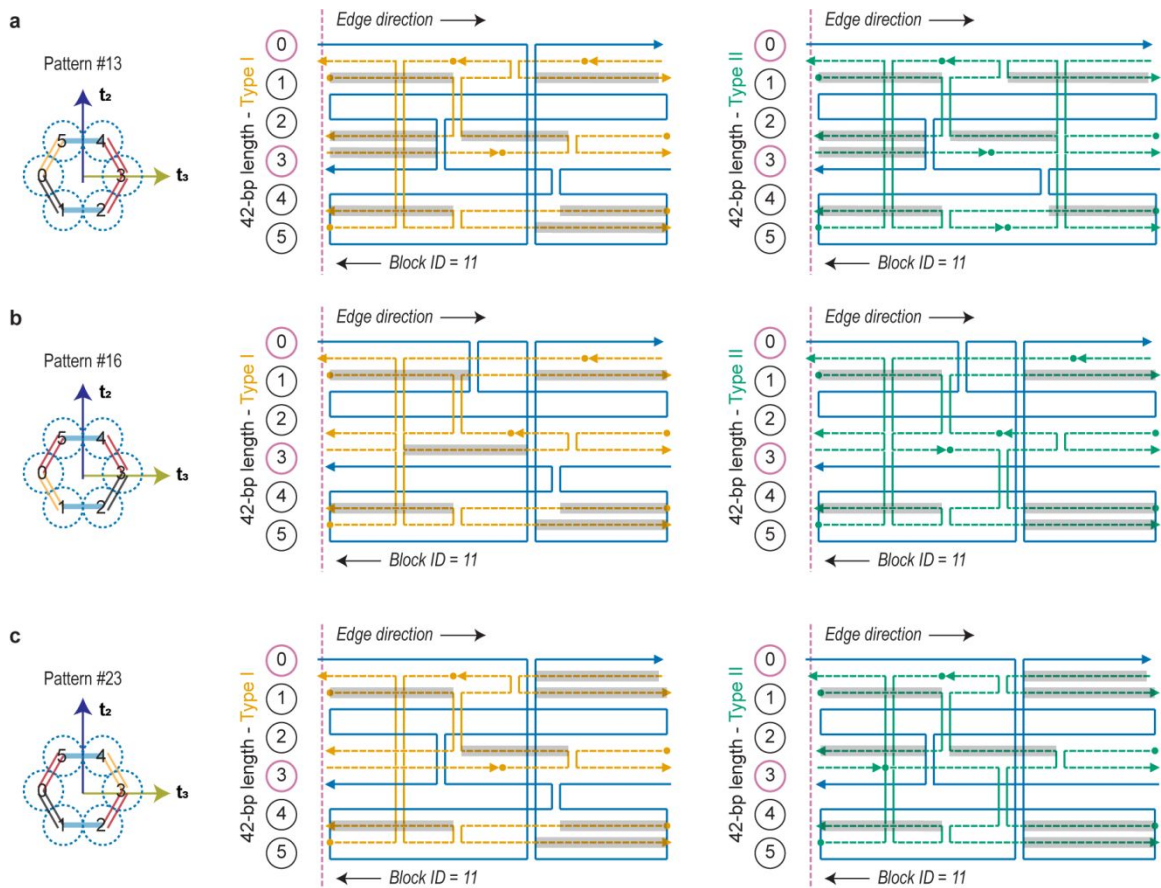

**Figure S10. Edge staple-design for the middle connection layer with the “maximized staple length” breaking rule when three different scaffold crossovers are used.** All FV DNA-NPs have only two edge staple-design patterns; type I (orange edge staples with three scaffold double-crossovers) and type II (green edge staples with two scaffold double-crossovers) for the 42-bp edge length. **(a-c)** The pattern of the edge staple-design is depending on how to assign the weight factors of initial scaffold crossovers, for example, pattern #13 **(a)**, pattern #16 **(b)**, and pattern #23 **(c)**. The blue strand is the part of the M13mp18 scaffold strand. The gray-shaded region represents the 14-nt seed dsDNA domain and arrowheads indicate the 3'-ends of strands.

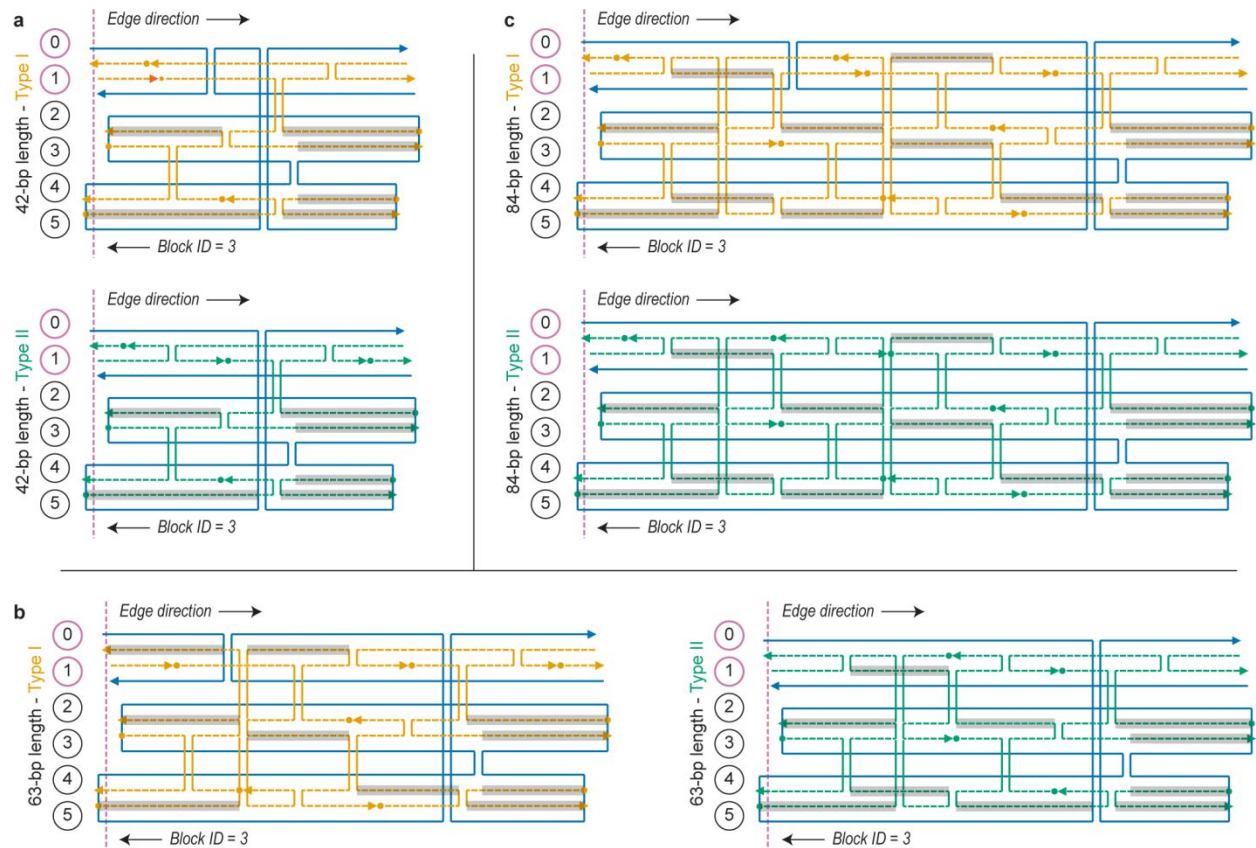

**Figure S11. Edge staple-design for the inner connection layer with the “maximized staple length” breaking rule when the prior block (ID = 3) is used. (a-c) All FV DNA-NPs have only two edge staple-design patterns; type I (orange edge staples with three scaffold double-crossovers) and type II (green edge staples with two scaffold double-crossovers) for 42-bp (a), 63-bp (b) and 84-bp (c) edge length. The blue strand is the part of the M13mp18 scaffold strand. The gray-shaded region represents the 14-nt seed dsDNA domain and arrowheads indicate the 3'-ends of strands.**

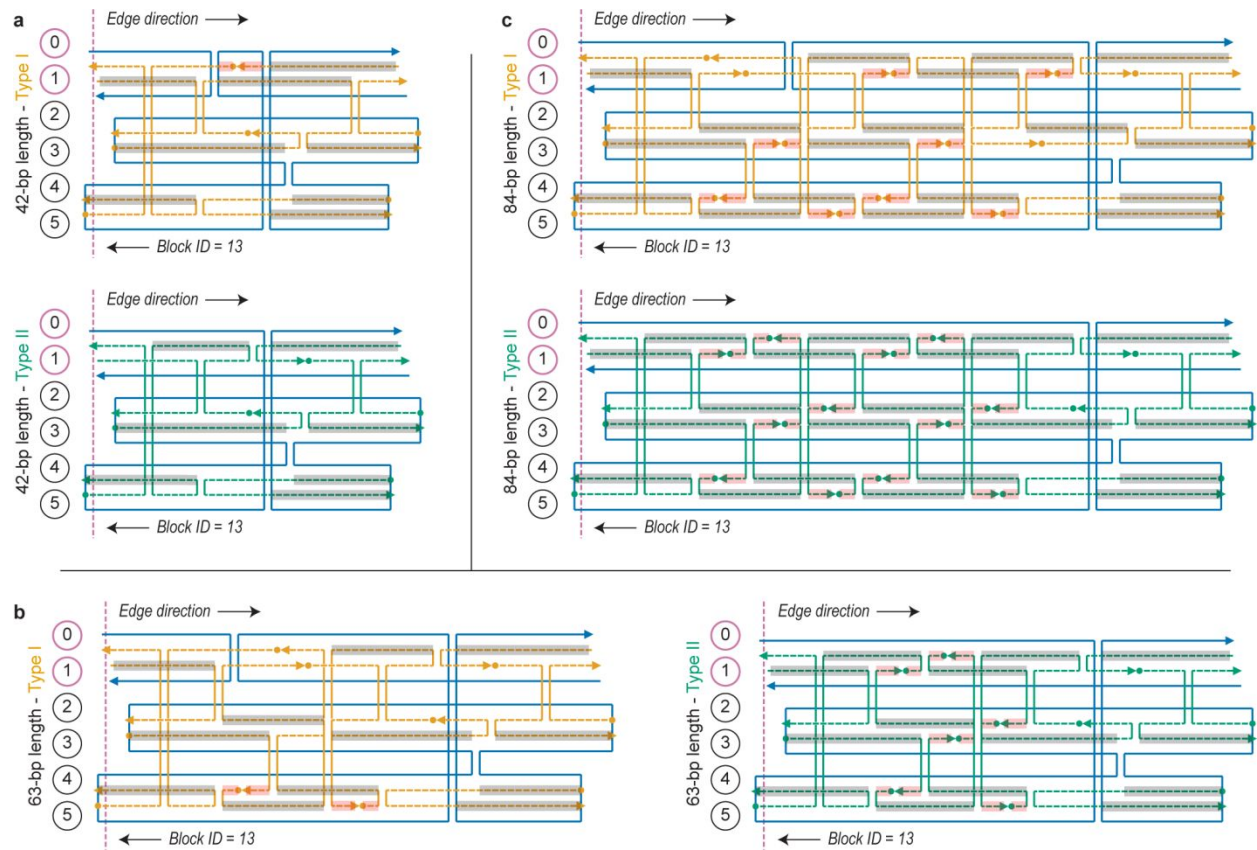

**Figure S12. Edge staple-design for the inner connection layer when the “Maximized number of seeds” breaking rule is used. (a-c) All FV DNA-NPs have only two edge staple-design patterns; type I (orange edge staples with three scaffold double-crossovers) and type II (green edge staples with two scaffold double-crossovers) for 42-bp (a), 63-bp (b) and 84-bp (c) edge length. The blue strand is the part of the M13mp18 scaffold strand. The gray-shaded region represents the 14-nt seed dsDNA domain and arrowheads indicate the 3'-ends of strands.**

### Maximized staple length

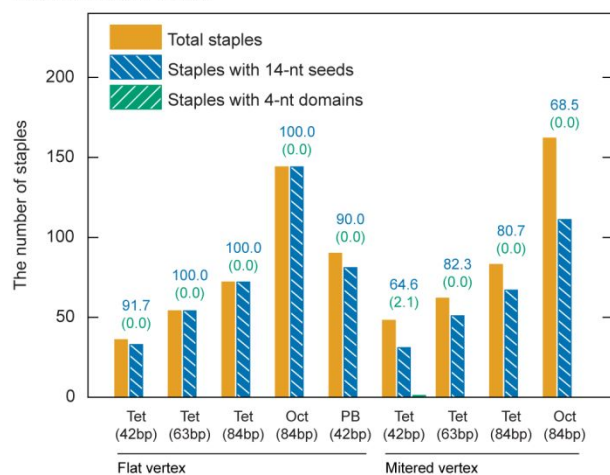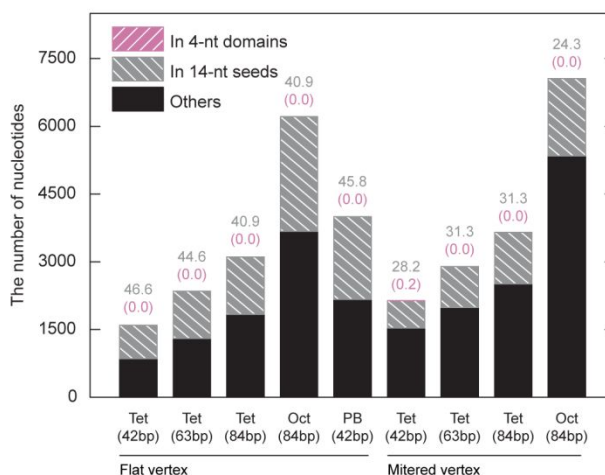

### Maximized number of seed domains

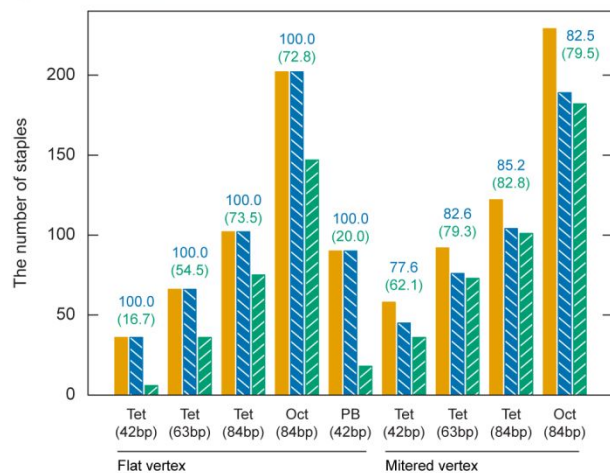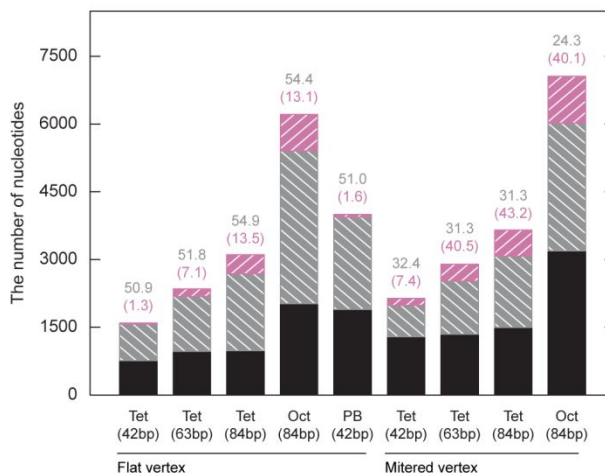

**Figure S13. A comparison of the number of dsDNA domains with two different staple-break rules; “maximized staple length” and “maximized number of seed domains” in the folded DNA 6HB DNA-NPs.** The values indicate the fraction of staples with 14-nt seed dsDNA domains (left) and basepairs that reside on strands with 14-nt seeds (right). The values in parenthesis denote the fraction of strands with 4-nt dsDNA domains (left) and base pairs that reside on strands with 4-nt domains (right).

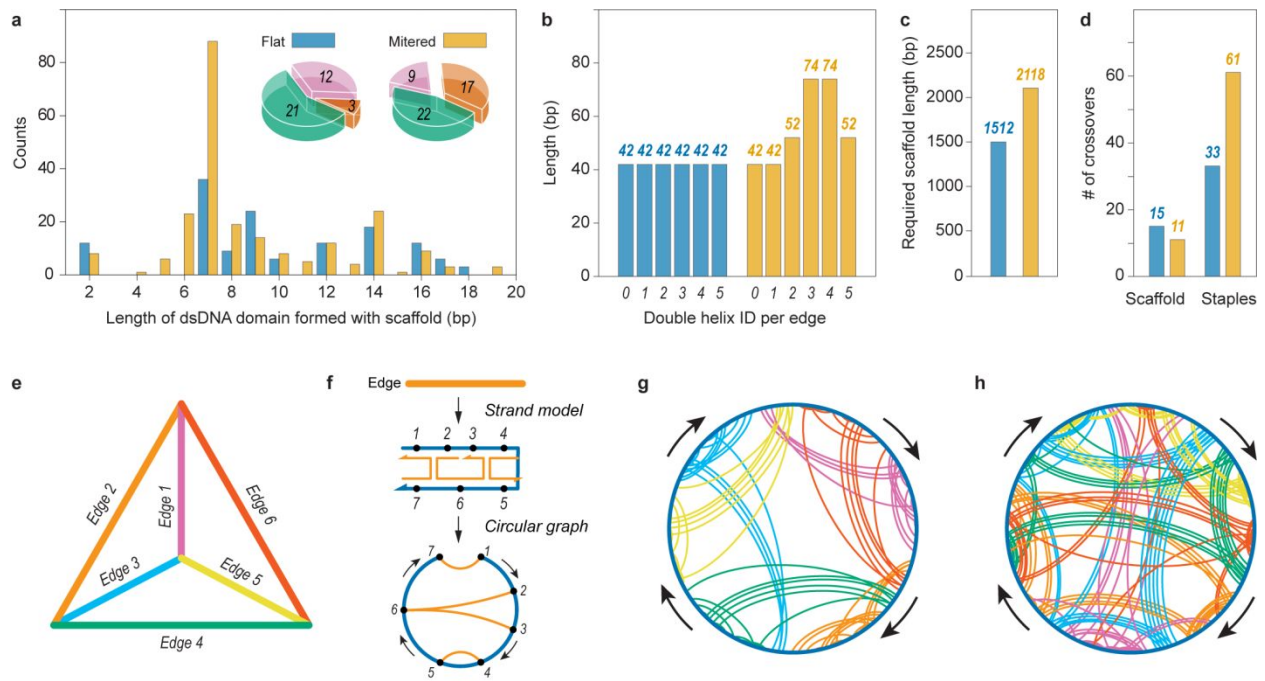

**Figure S14. Quantitative analysis of the computed sequence design of the 42-bp tetrahedron DNA origami structure between the FV and MV designs.** (a-d) The distribution of lengths of dsDNA domains (a), of edge lengths (b) of base pairs according to the cross-section ID, of required scaffold lengths (c) and the total number of crossovers (d) for the FV (blue) and MV (orange) tetrahedron of 42-bp edge length. Two pie charts (right in panel (a)) depict the ratio of staple distributions with the number of staples with one 14-nt seed (green), two 14-nt seeds (pink) and without the 14-nt seed (orange). (e) Schematic diagram of the initial geometry of the tetrahedron, which has edge ID with the specific color. (f) Schematic illustration of how to render a circular graph in which the outer circle representing the scaffold has points assigned in the middle of dsDNA domain. Two points can be connected when they are lined up in the same staple. A nick of the scaffold is positioned at the top and arrows indicates the 5' to 3'-end direction of the scaffold. (g-h) Two circular maps for the FV (g) and MV (h) tetrahedron.

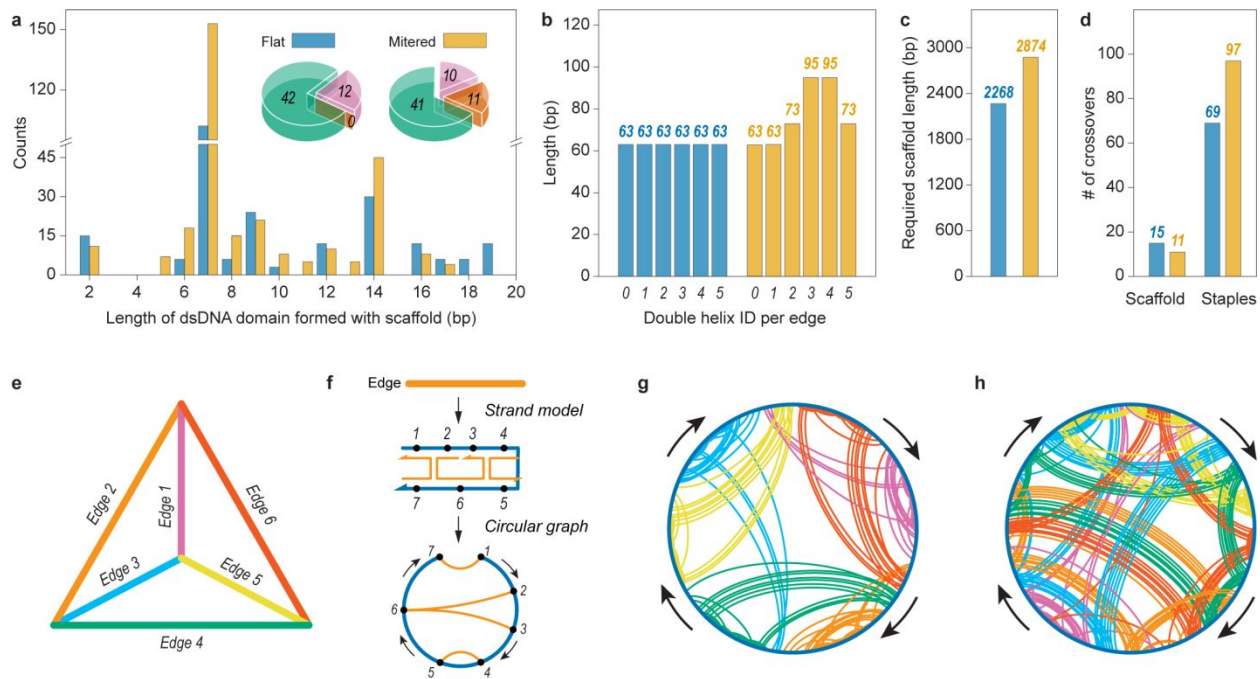

**Figure S15. Quantitative analysis of the computed sequence design of the tetrahedron of 63-bp edge length between the FV and MV designs.** (a-d) The distribution of lengths of dsDNA domains (a), of edge lengths (b) of base pairs according to the cross-section ID, of required scaffold lengths (c) and the total number of crossovers (d) for the FV (blue) and MV (orange) tetrahedron of 63-bp edge length. Two pie charts (right in panel (a)) depict the ratio of staple distributions with the number of staples with one 14-nt seed (green), two 14-nt seeds (pink) and without the 14-nt seed (orange). (e) Schematic diagram of the initial geometry of the tetrahedron, which has edge ID with the specific color. (f) Schematic illustration of how to render a circular graph in which the outer circle representing the scaffold has points assigned in the middle of dsDNA domain. Two points can be connected when they are lined up in the same staple. A nick of the scaffold is positioned at the top and arrows indicates the 5' to 3'-end direction of the scaffold. (g-h) Two circular maps for the FV (g) and MV (h) tetrahedron.



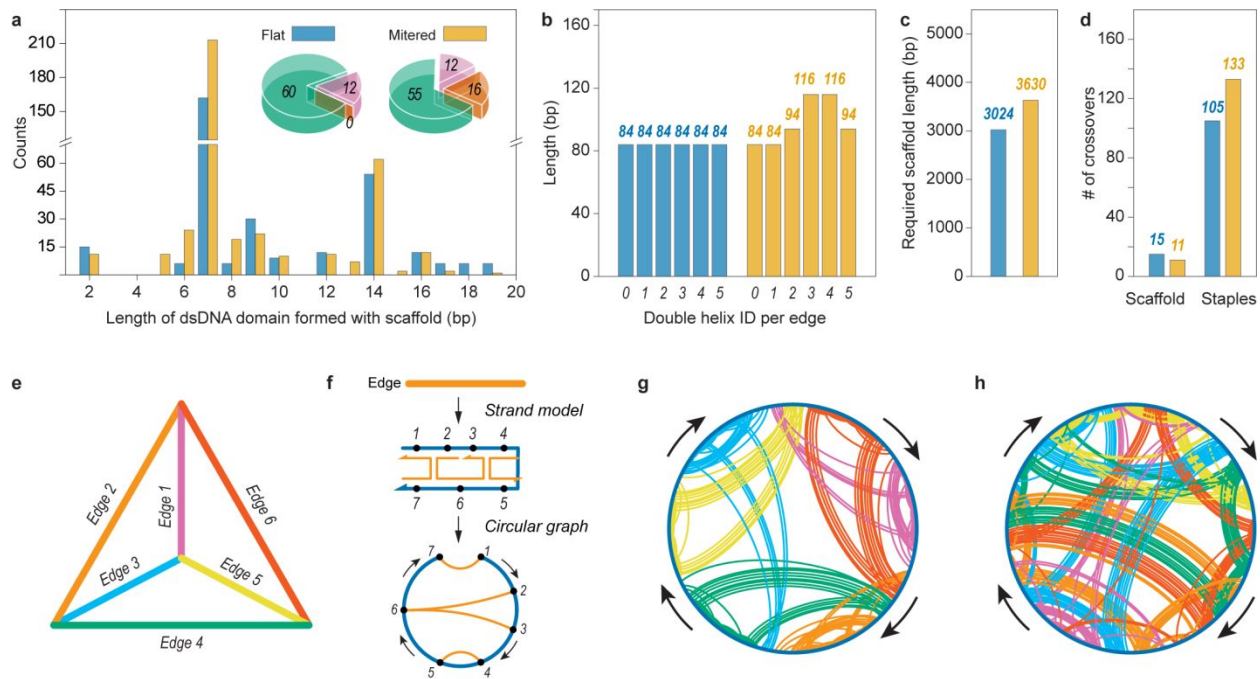

**Figure S16. Quantitative analysis of the computed sequence design of the tetrahedron of 84-bp edge length between the FV and MV. (a-d)** The distribution of lengths of dsDNA domains (a), of edge lengths (b) of base pairs according to the cross-section ID, of required scaffold lengths (c) and the total number of crossovers (d) for the FV (blue) and MV (orange) tetrahedron of 84-bp edge length. Two pie charts (right in panel (a)) depict the ratio of staple distributions with the number of staples with one 14-nt seed (green), two 14-nt seeds (pink) and without the 14-nt seed (orange). (e) Schematic diagram of the initial geometry of the tetrahedron, which has edge ID with the specific color. (f) Schematic illustration of how to render a circular graph in which the outer circle representing the scaffold has points assigned in the middle of dsDNA domain. Two points can be connected when they are lined up in the same staple. A nick of the scaffold is positioned at the top and arrows indicates the 5' to 3'-end direction of the scaffold. (g-h) Two circular maps for the FV (g) and MV (h) tetrahedron.

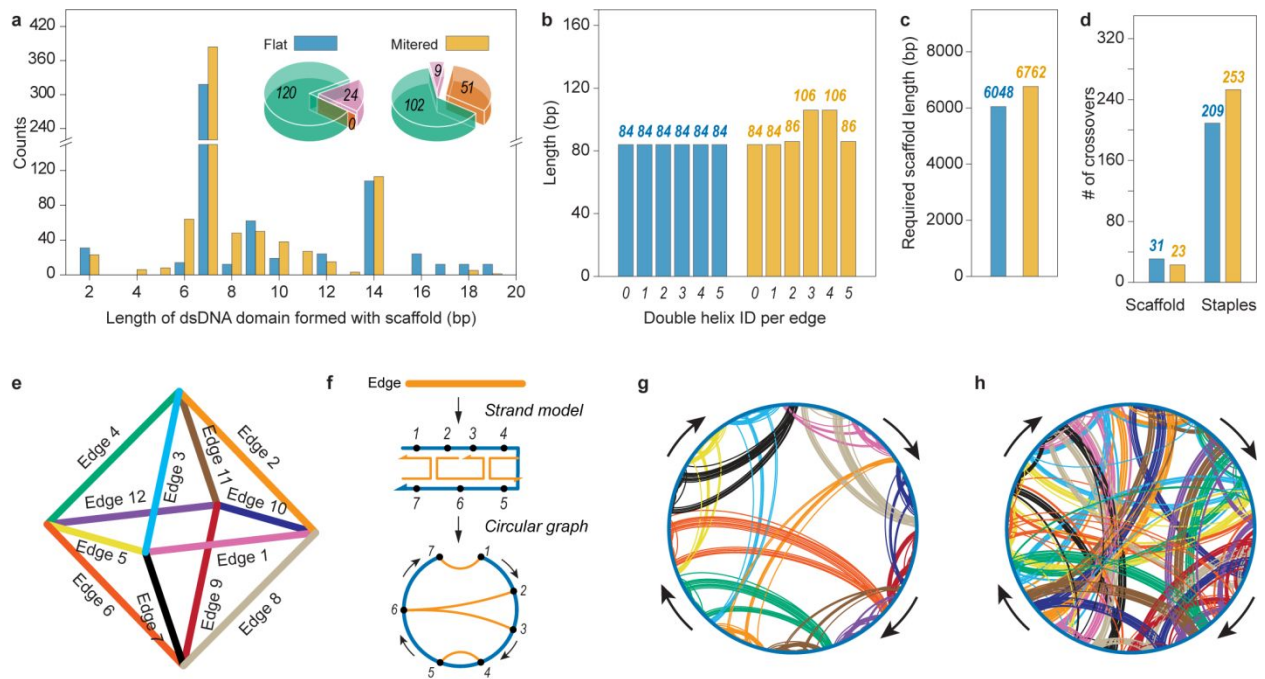

**Figure S17. Quantitative analysis of the computed sequence design of the octahedron of 84-bp edge length between the FV and MV designs.** (a-d) The distribution of lengths of dsDNA domains (a), of edge lengths (b) of base pairs according to the cross-section ID, of required scaffold lengths (c) and the total number of crossovers (d) for the FV (blue) and MV (orange) octahedron of 84-bp edge length. Two pie charts (right in panel (a)) depict the ratio of staple distributions with the number of staples with one 14-nt seed (green), two 14-nt seeds (pink) and without the 14-nt seed (orange). (e) Schematic diagram of the initial geometry of the tetrahedron, which has edge ID with the specific color. (f) Schematic illustration of how to render a circular graph in which the outer circle representing the scaffold has points assigned in the middle of dsDNA domain. Two points can be connected when they are lined up in the same staple. A nick of the scaffold is positioned at the top and arrows indicates the 5' to 3'-end direction of the scaffold. (g-h) Two circular maps for the FV (g) and MV (h) octahedron.

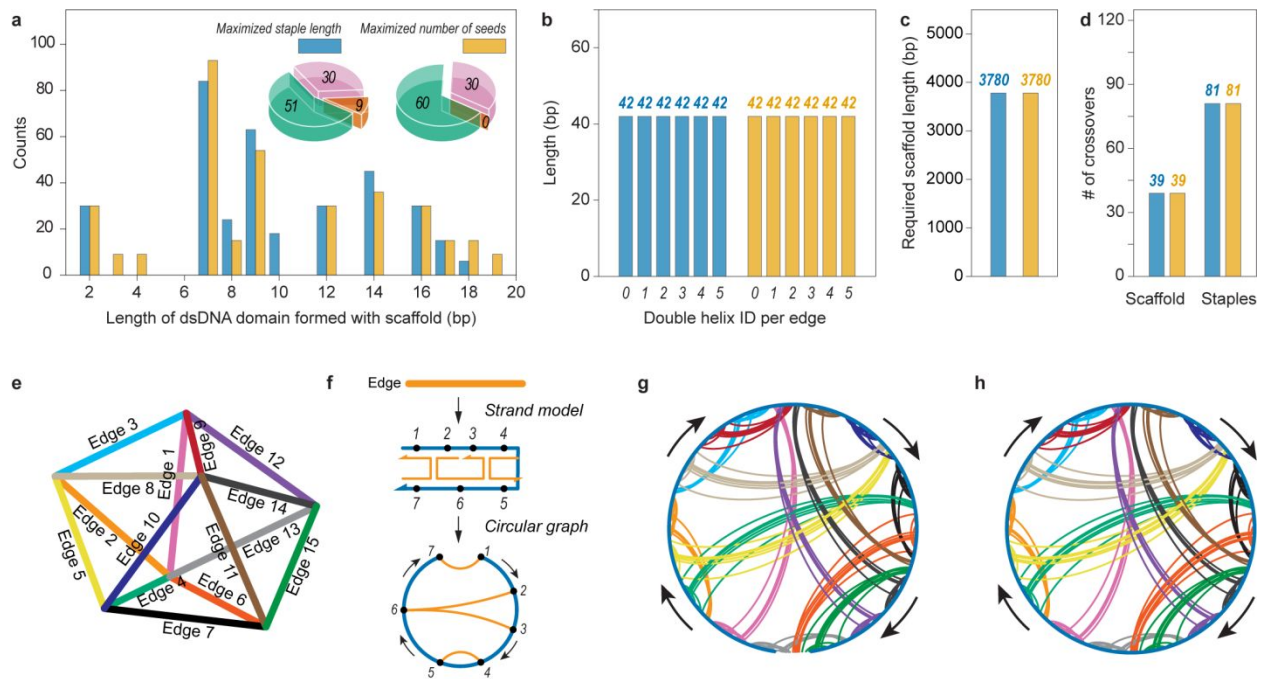

**Figure S18. Quantitative analysis of the computed sequence design of the 42-bp pentagonal bipyramid DNA origami structure with the FV design when using either “maximized staple length” or “maximized number of seeds” staple breaking rule. (a-d)** The distribution of lengths of dsDNA domains (a), of edge lengths (b) of base pairs according to the cross-section ID, of required scaffold lengths (c) and the total number of crossovers (d) for the 42-bp pentagonal bipyramid using the “maximized staple length” (blue) and “maximized number for seeds” (orange) staple breaking. Two pie charts (right in panel (a)) depict the ratio of staple distributions with the number of staples with one 14-nt seed (green), two 14-nt seeds (pink) and without the 14-nt seed (orange). (e) Schematic diagram of the initial geometry of the tetrahedron, which has edge ID with the specific color. (f) Schematic illustration of how to render a circular graph in which the outer circle representing the scaffold has points assigned in the middle of dsDNA domain. Two points can be connected when they are lined up in the same staple. A nick of the scaffold is positioned at the top and arrows indicates the 5' to 3'-end direction of the scaffold. (g-h) Two circular maps for the 42-pentagonal pyramid using the “maximized staple length” (g) and “maximized number of seeds” (h) staple breaking.

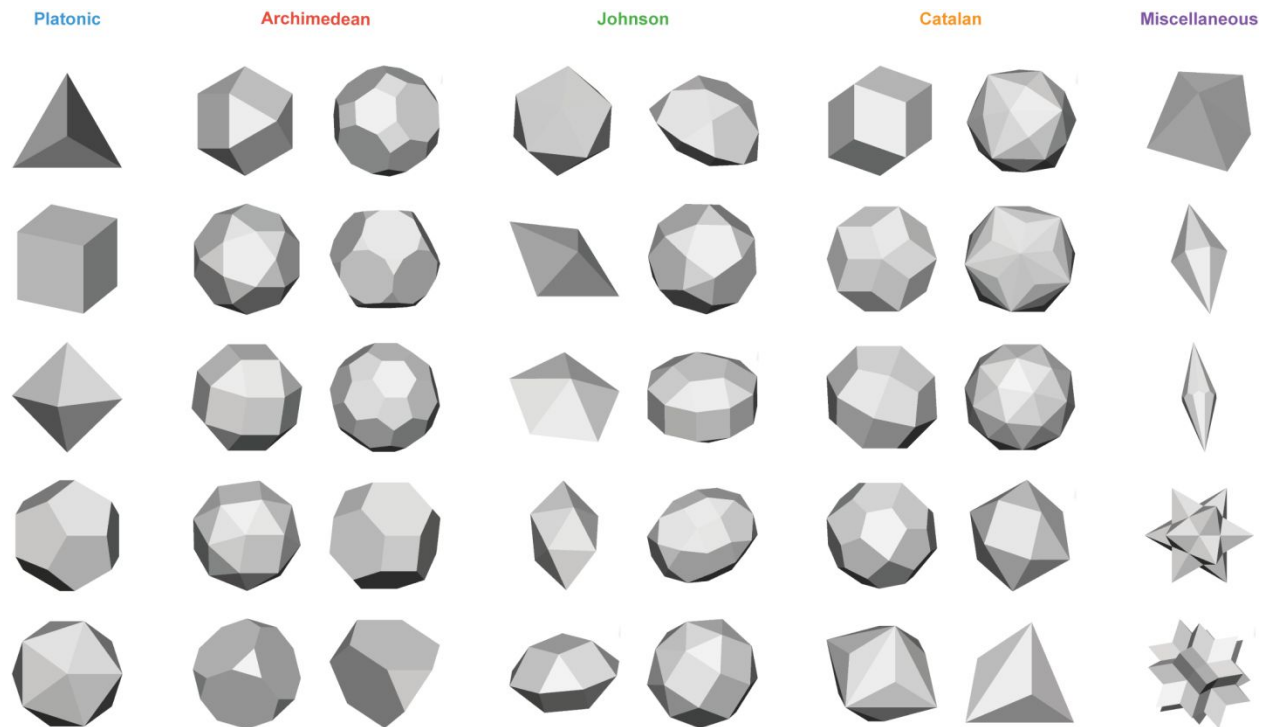

Figure S19. 40 target geometries.

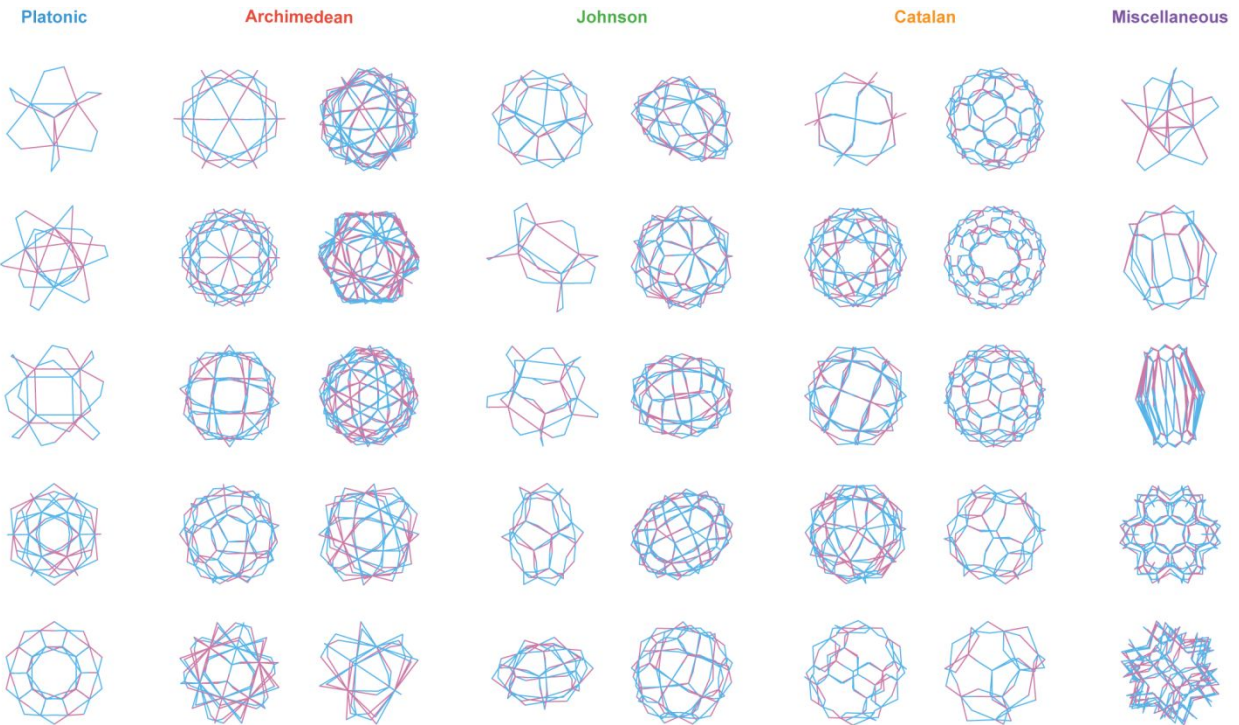

**Figure S20. Spanning trees of the dual graph of the loop-crossover structure generated by the algorithm when the FV design is used.** The spanning tree (sky blue) of each dual graph (reddish purple) of the loop-crossover structure defines the double crossovers to be retained by inverting into the loop-crossover structure. The double-crossovers associated with the remaining edges are deleted by the inverting procedure. The nodes in the dual graph network are not shown.

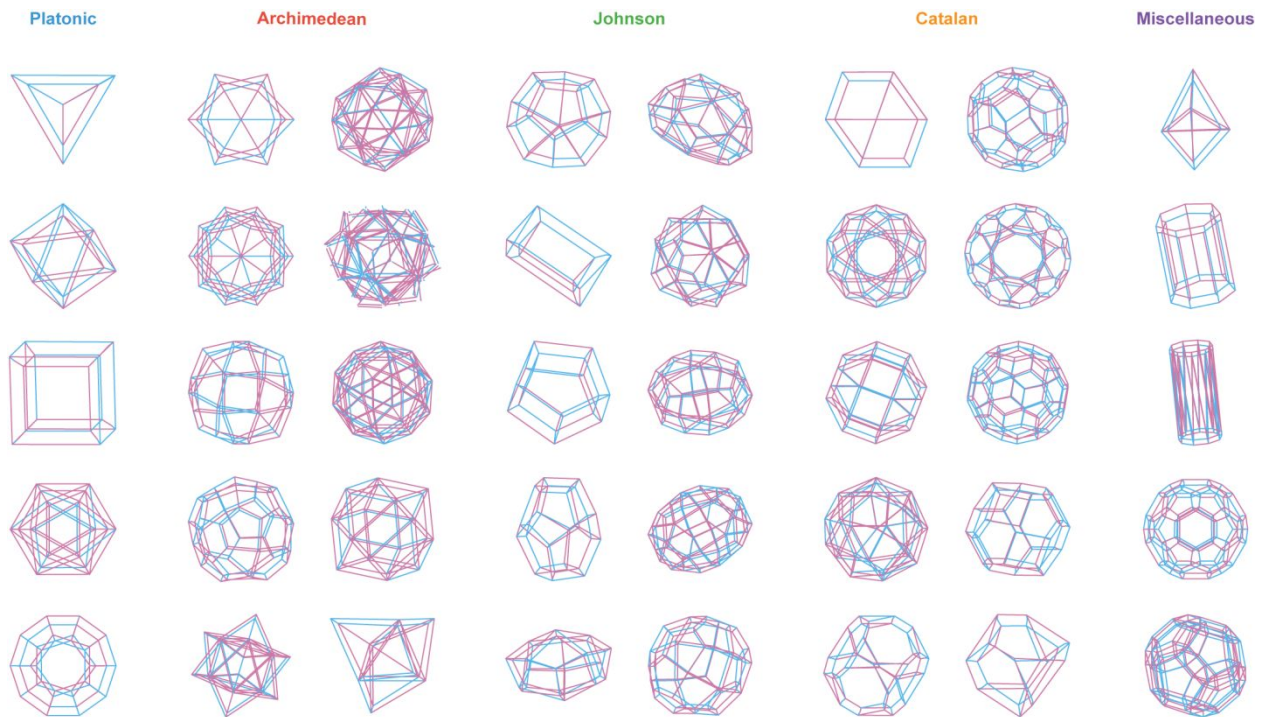

**Figure S21. Spanning trees of the dual graph of the loop-crossover structure generated by the algorithm when the MV design is used.** The spanning tree (sky blue) of each dual graph (reddish purple) of the loop-crossover structure defines the double crossovers to be retained by inverting into the loop-crossover structure. The double-crossovers associated with the remaining edges are deleted by the inverting procedure. The nodes in the dual graph network are not shown.

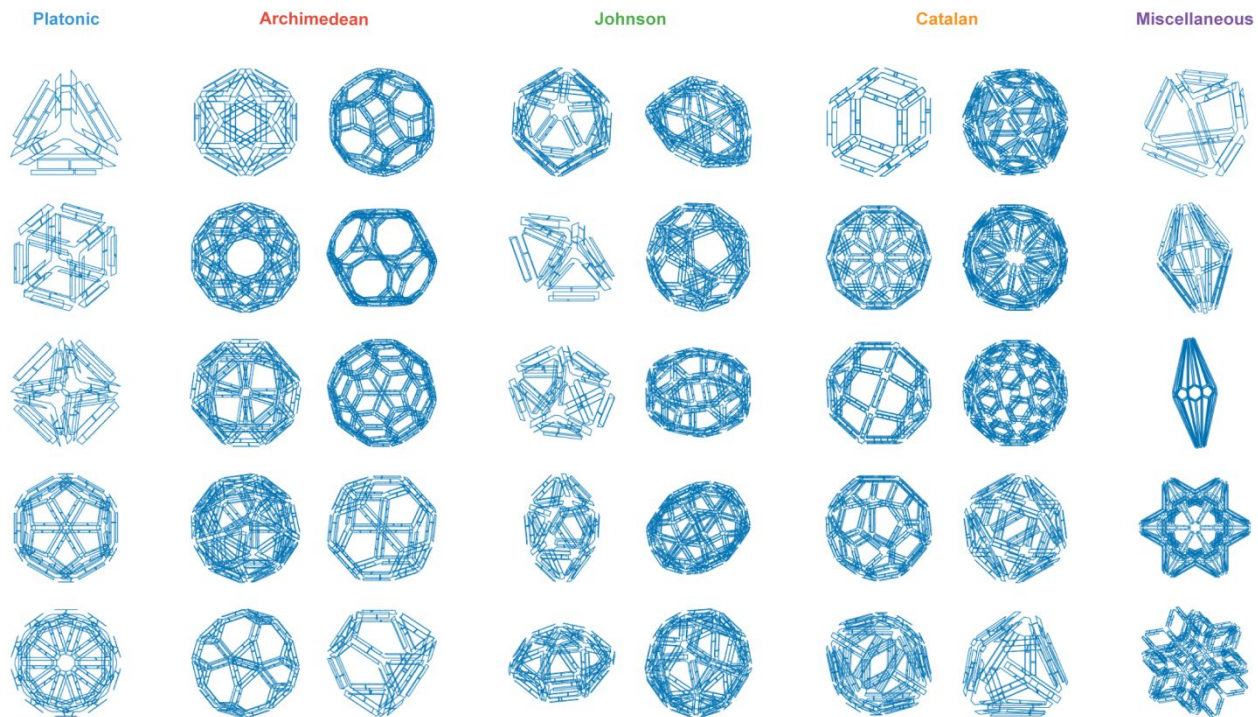

**Figure S22. Scaffold-folding path of 40 diverse DNA-NPs generated by the algorithm when the FV design is used.** The continuous blue loop is the single-stranded DNA scaffold routed throughout the entire DNA-NP of arbitrary shape.

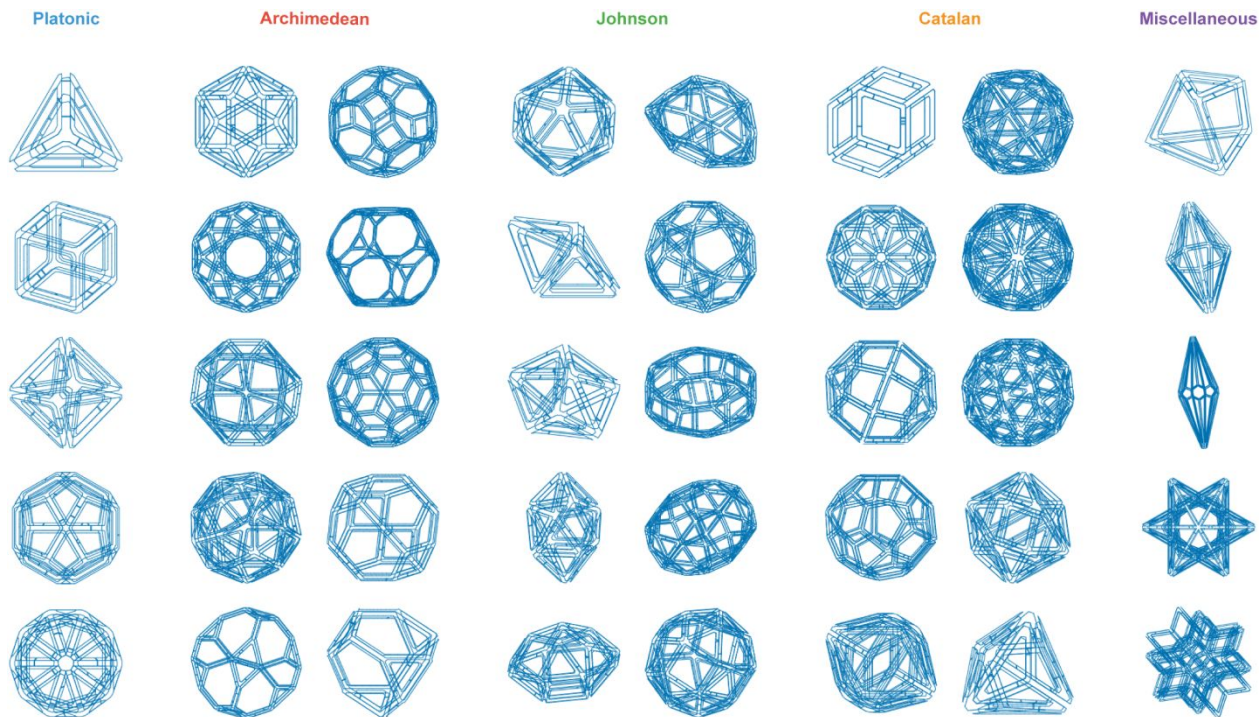

**Figure S23. Scaffold-folding path of 40 diverse DNA-NPs generated by the algorithm when the MV design is used.** The continuous blue loop is the single-stranded DNA scaffold routed throughout the entire DNA-NP of arbitrary shape.



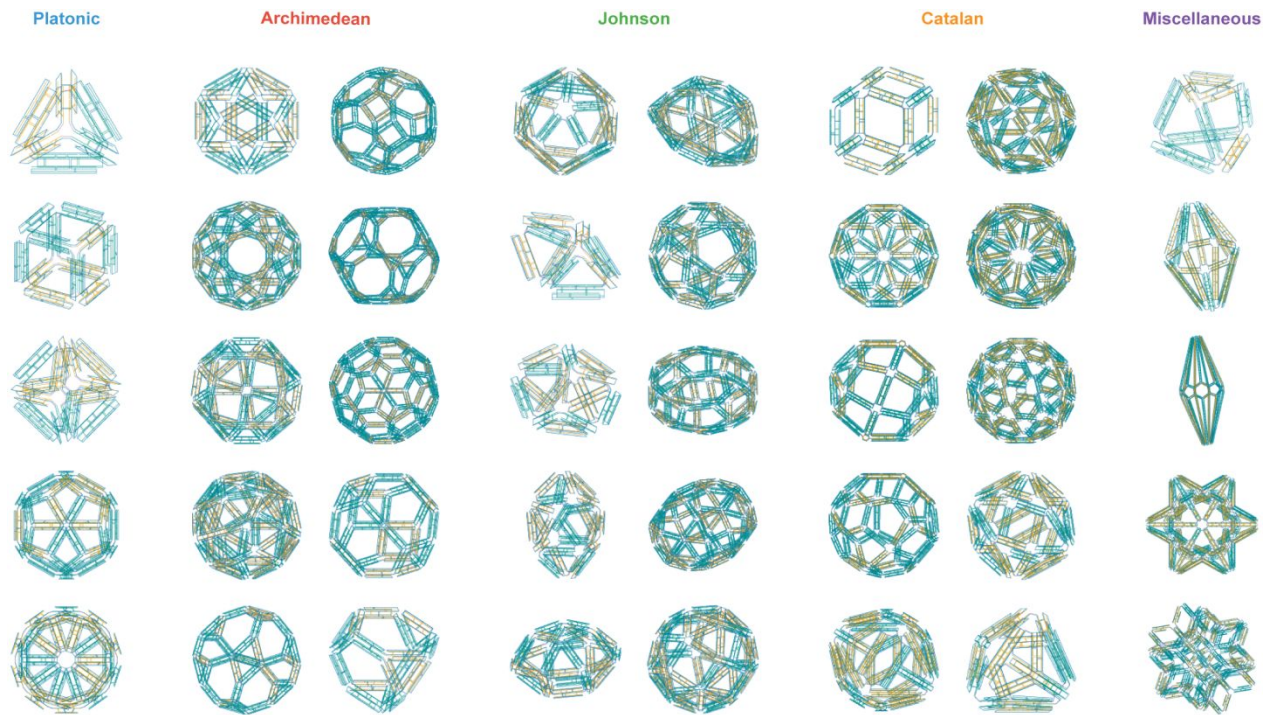

**Figure S24. Staple and scaffold design path of 40 diverse DNA-NPs generated by the algorithm when the FV design is used.** Complementary staples (green or orange) are wound in an antiparallel direction around the scaffold strand (blue) to assemble B-form double helices.

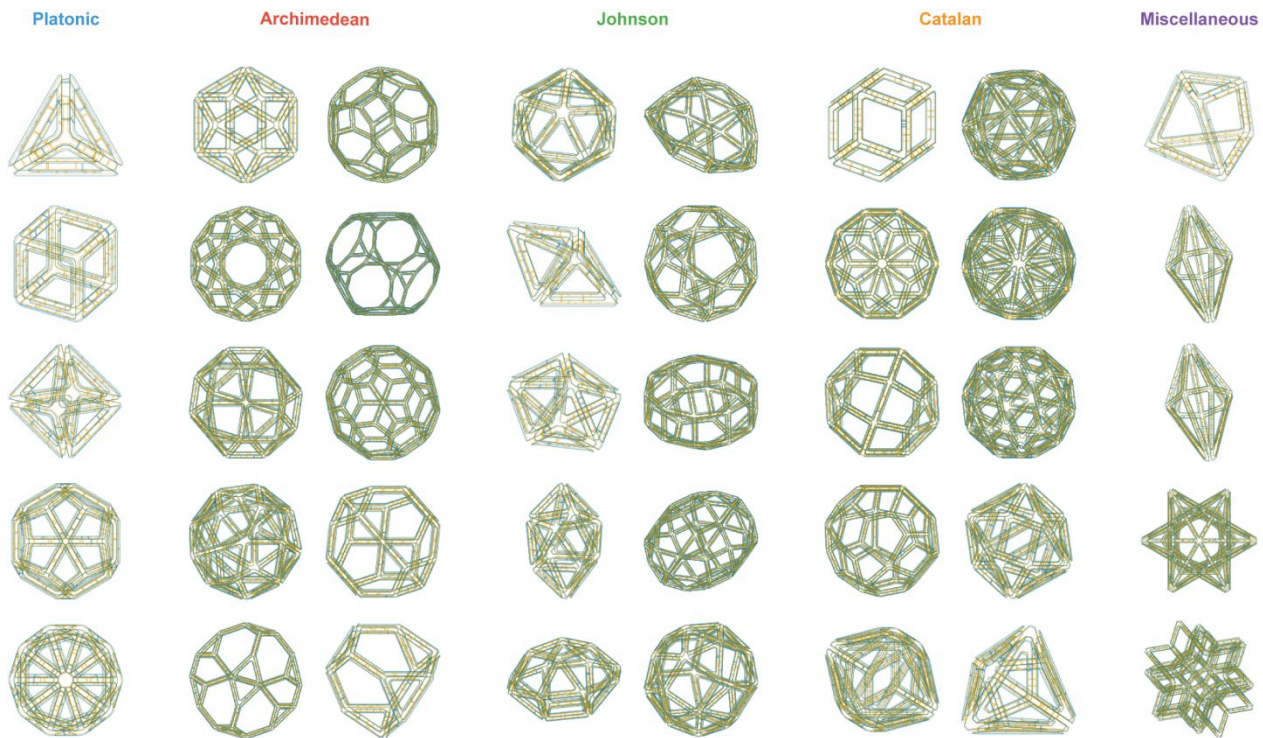

**Figure S25. Staple and scaffold design path of 40 diverse DNA-NPs generated by the algorithm when the MV design is used. Complementary staples (orange) are wound in an antiparallel direction around the scaffold strand (blue) to assemble B-form double helices.**

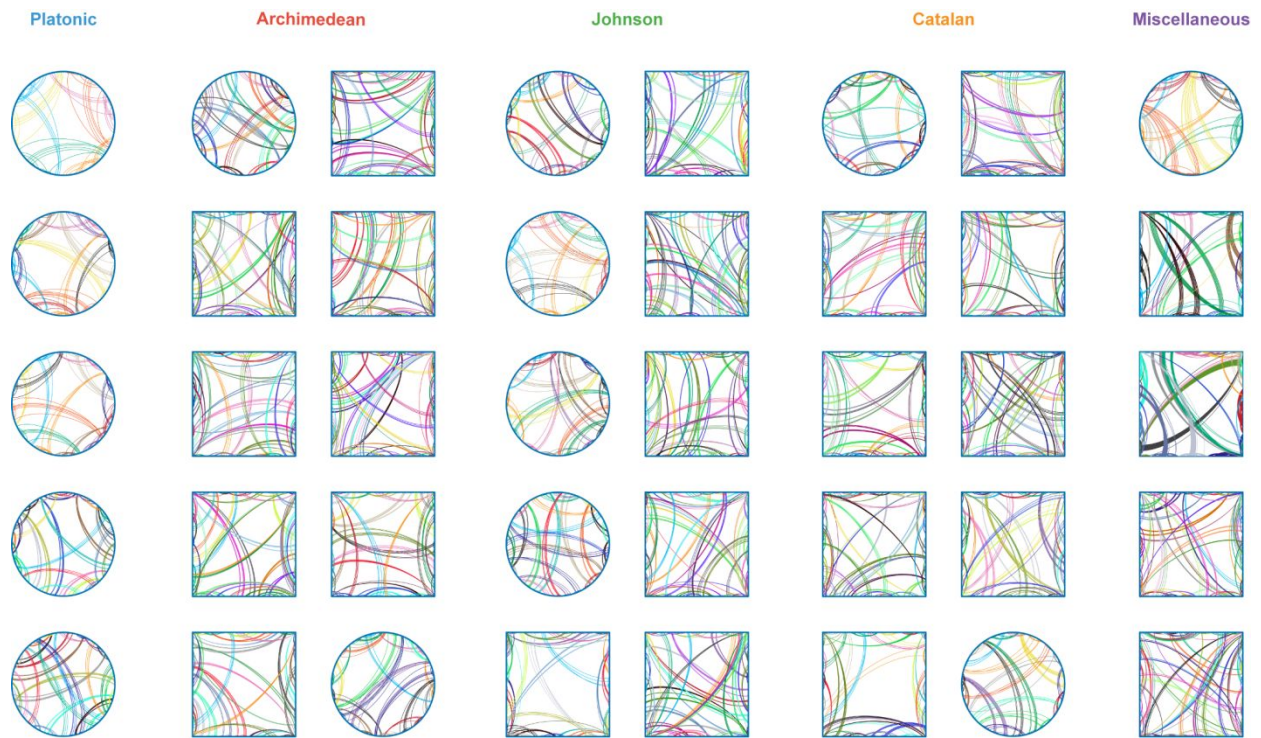

**Figure S26. Circular maps of 40 diverse DNA-NPs generated by the algorithm when the FV design is used. DNA-NPs requiring scaffolds longer than 7,249-nt M13mp18 are represented by square maps.**

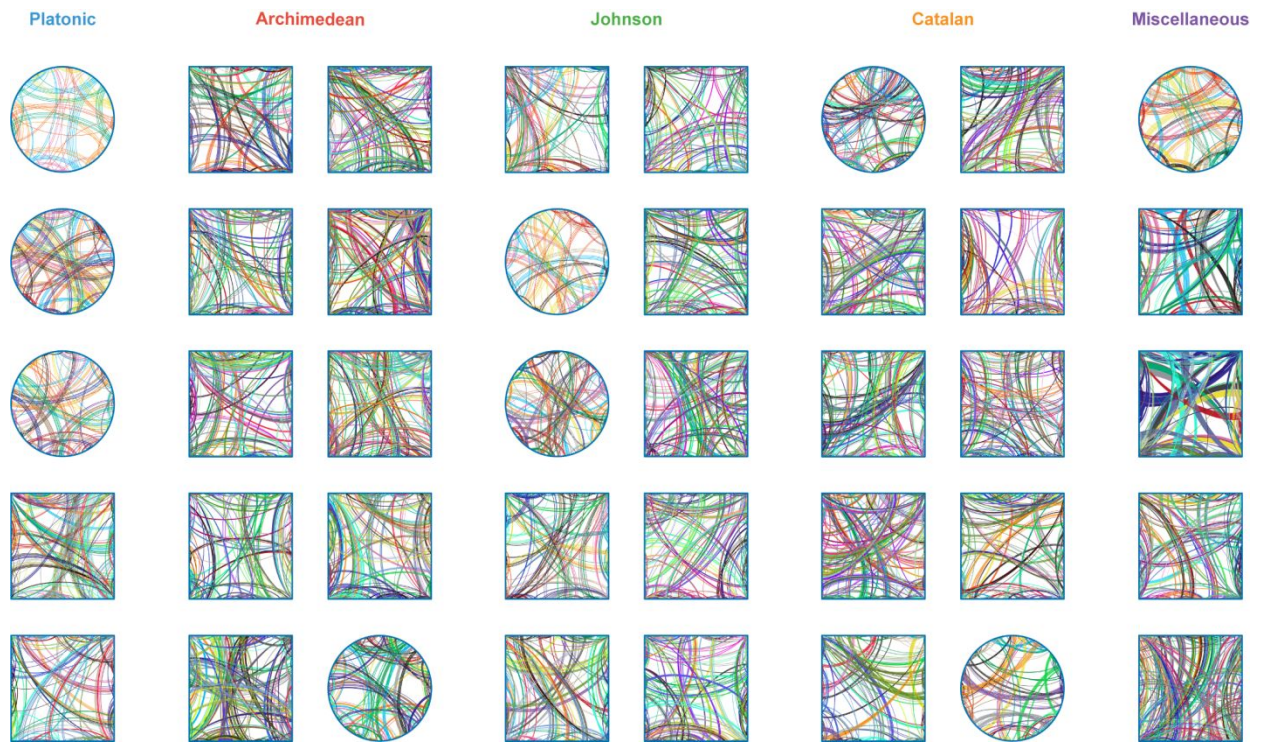

**Figure S27. Circular maps of 40 diverse DNA-NPs generated by the algorithm when the MV design is used. DNA-NPs requiring scaffolds longer than 7,249-nt M13mp18 are represented by square maps.**

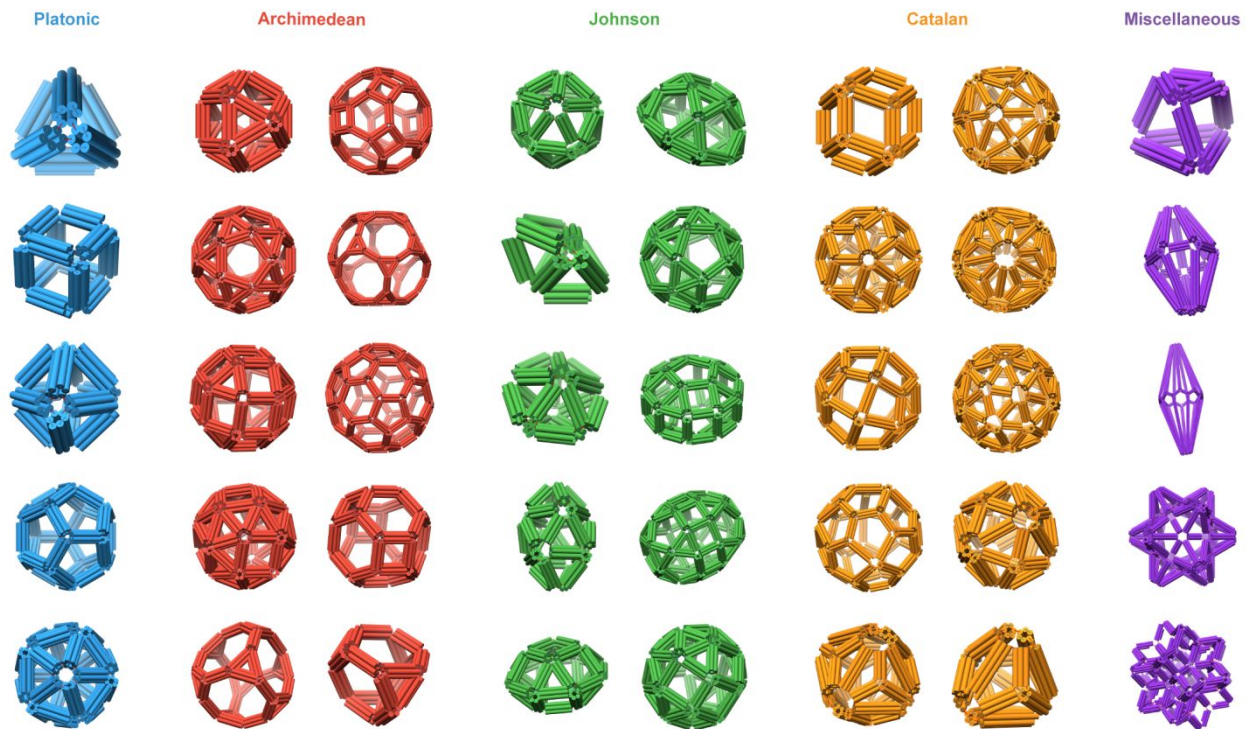

**Figure S28.** Cylindrical representation of 40 diverse FV DNA-NPs generated by the **algorithm**. Each cylinder whose diameter is 2 nm represents a DNA double helix.

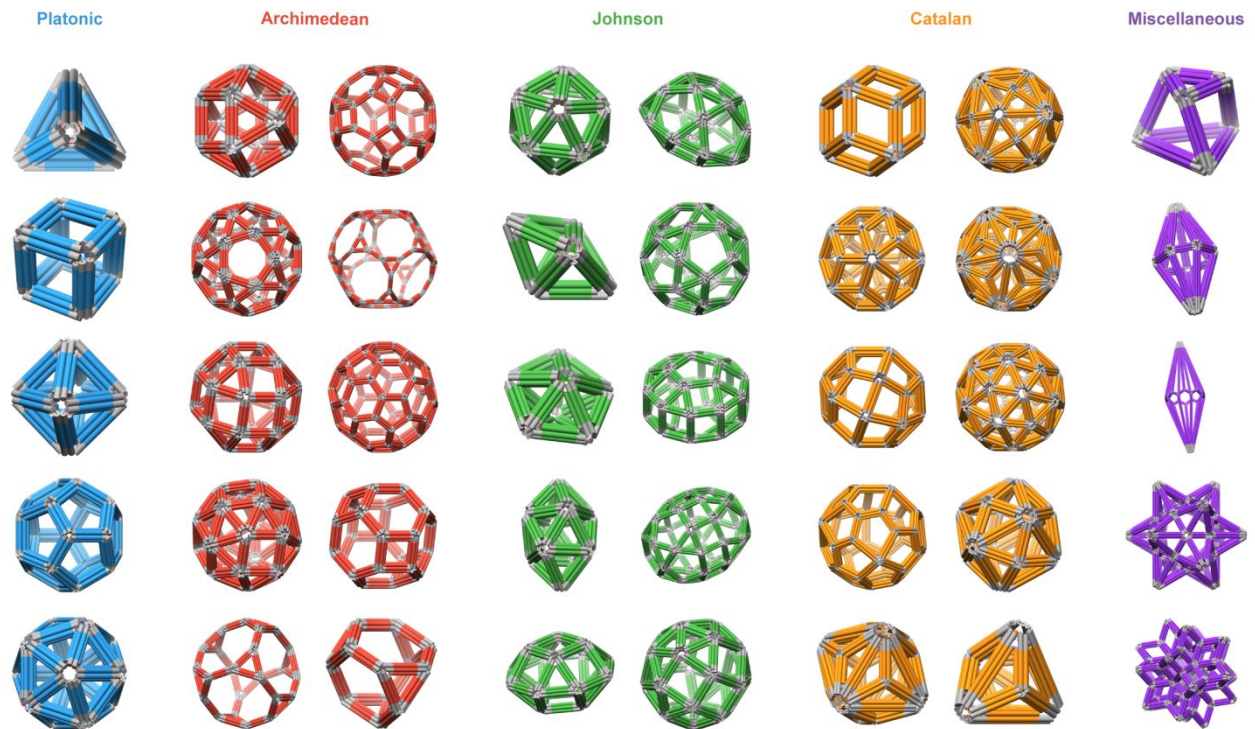

**Figure S29.** Cylindrical representation of 40 diverse MV DNA-NPs generated by the **algorithm**. Each cylinder whose diameter is 2 nm represents a DNA double helix.

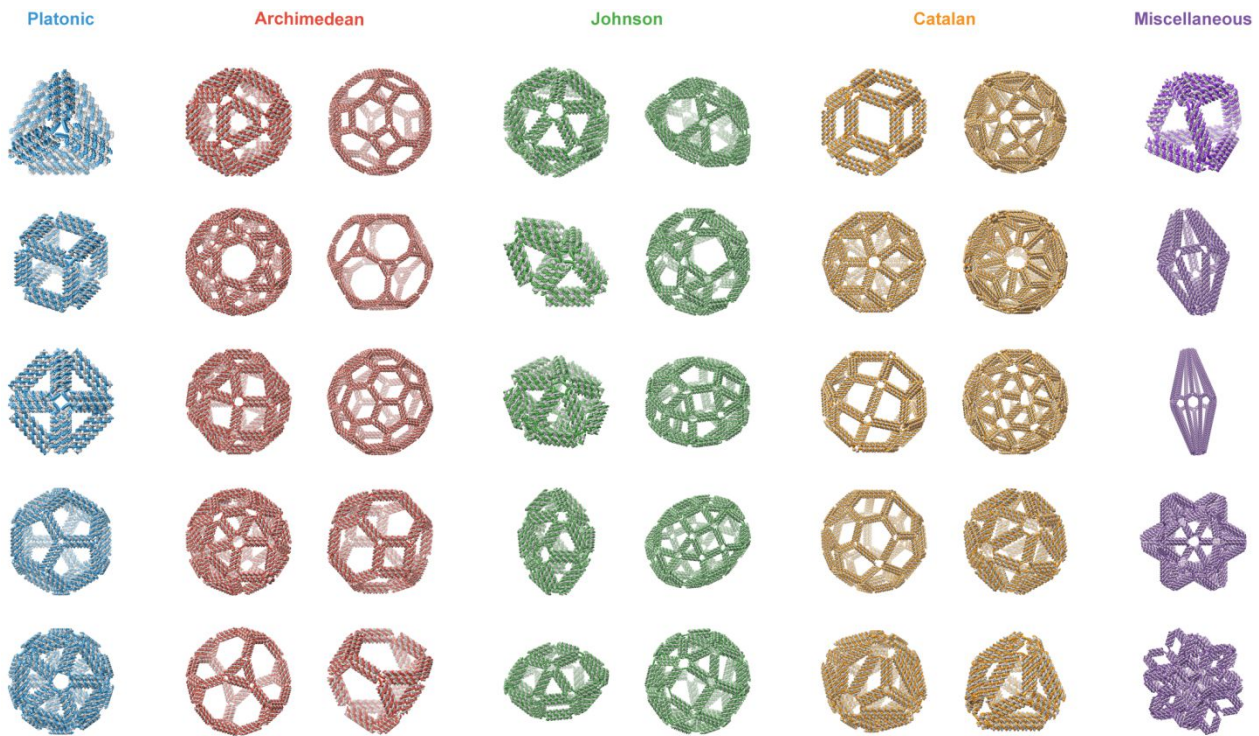

**Figure S30. Atomic model of 40 diverse FV DNA-NPs generated by the algorithm.**

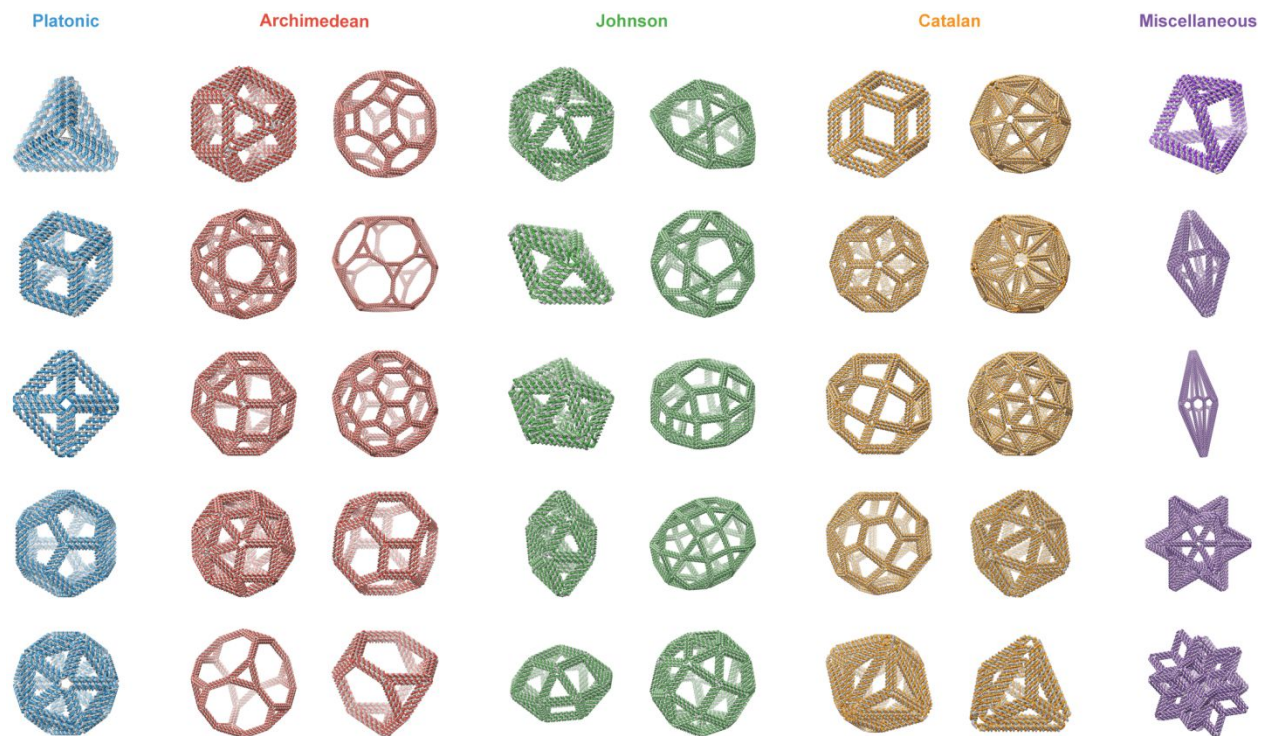

**Figure S31. Atomic model of 40 diverse MV DNA-NPs generated by the algorithm.**



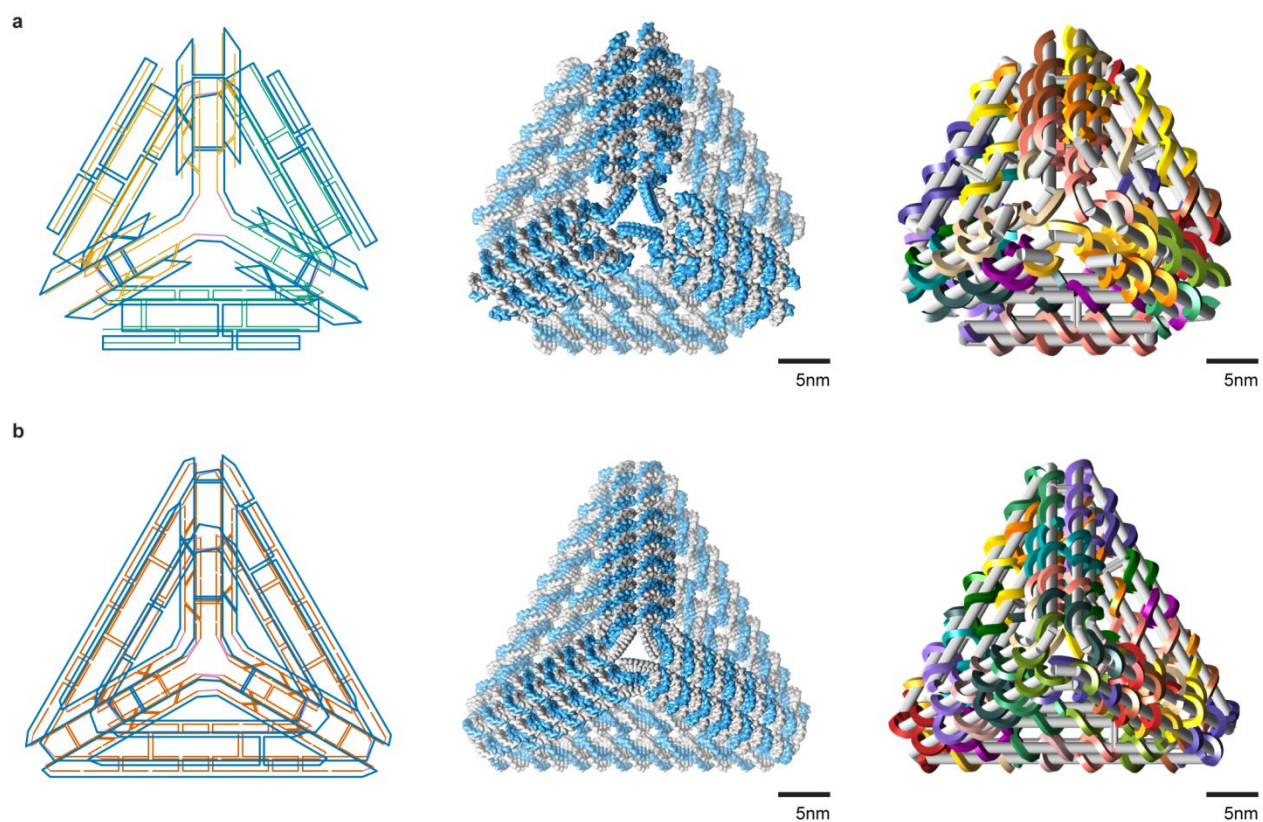

**Figure S32. The staple and scaffold routing (left), atomic (middle) and cylindrical (right) model of the tetrahedron of 42-bp edge length. (a-b) The FV (a) and MV (b) tetrahedron of 42-bp edge length. In the cylindrical model, the scaffold and staples are represented by gray and multiple colors, respectively; See Table S5 for the required scaffold lengths and Table S6 and Table S7 for design parameters.**

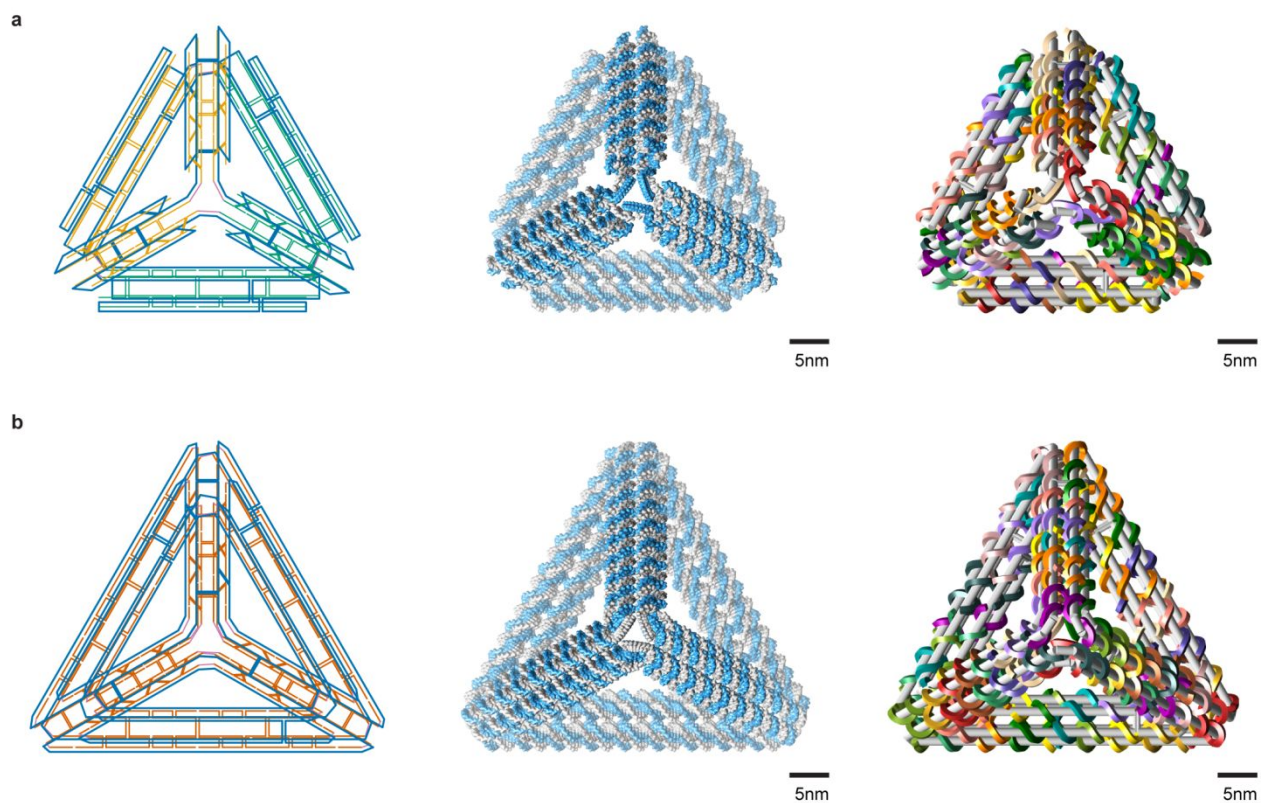

**Figure S33. The staple and scaffold routing (left), atomic (middle) and cylindrical (right) model of the tetrahedron of 63-bp edge length . (a-b) The FV (a) and MV (b) tetrahedron of 63-bp edge length. In the cylindrical model, the scaffold and staples are represented by gray and multiple colors, respectively; See Table S5 for the required scaffold lengths and Table S6 and Table S7 for design parameters.**

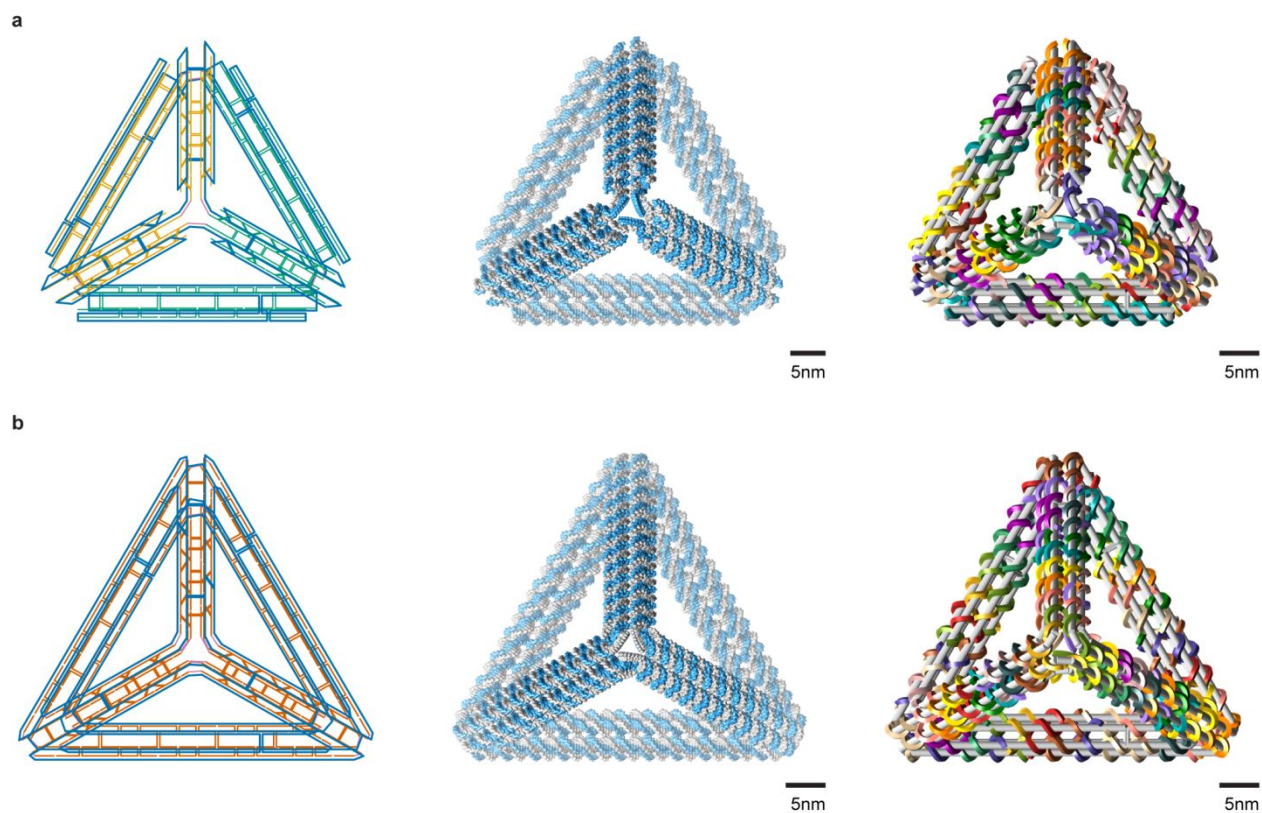

**Figure S34. The staple and scaffold routing (left), atomic (middle) and cylindrical (right) model of the tetrahedron of 84-bp edge length. (a-b) The FV (a) and MV (b) tetrahedron of 84-bp edge length. In the cylindrical model, the scaffold and staples are represented by gray and multiple colors, respectively; See Table S5 for the required scaffold lengths and Table S6 and Table S7 for design parameters.**

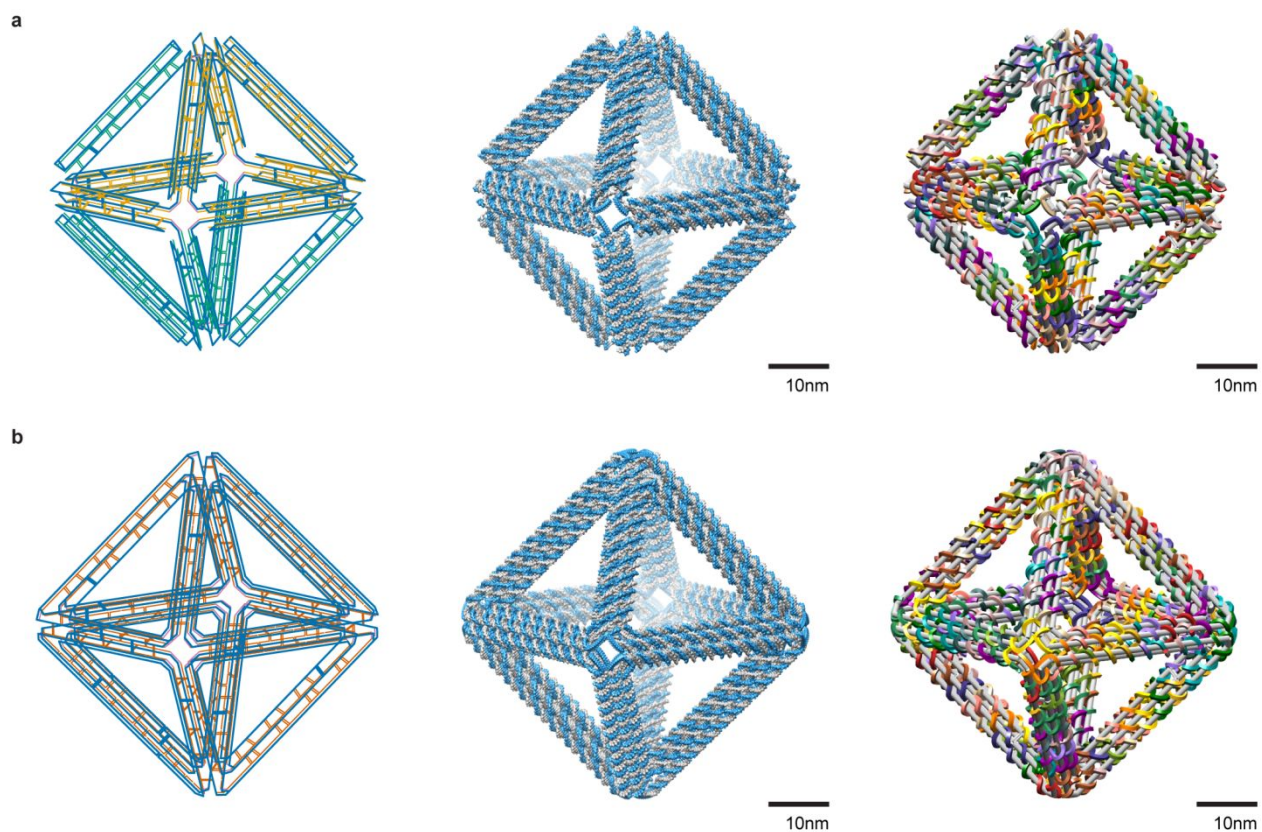

**Figure S35. The staple and scaffold routing (left), atomic (middle) and cylindrical (right) model of the octahedron of 84-bp edge length. (a-b) The FV (a) and MV (b) tetrahedron of 84-bp edge length. In the cylindrical model, the scaffold and staples are represented by gray and multiple colors, respectively; See Table S5 for the required scaffold lengths and Table S6 and Table S7 for design parameters.**

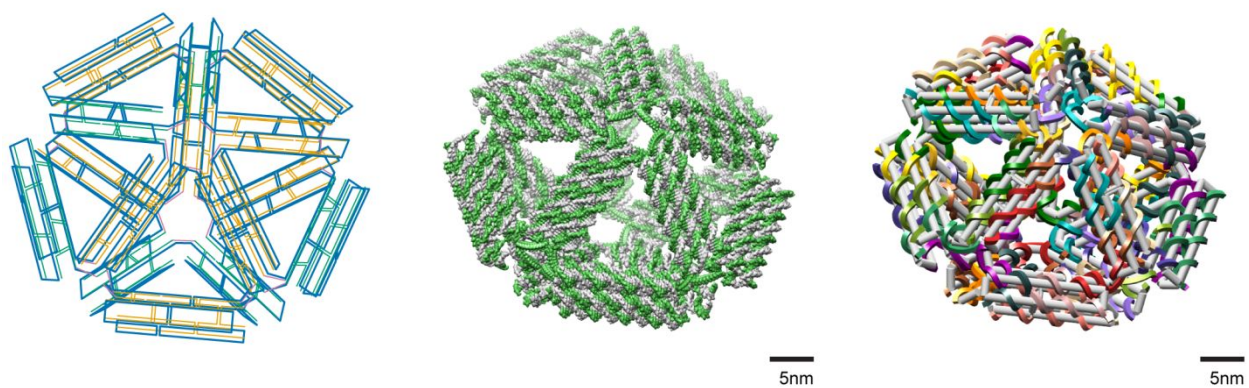

**Figure S36. The staple and scaffold routing (left), atomic (middle) and cylindrical (right) model of the pentagonal bipyramid of 42-bp edge length.** In the cylindrical model, the scaffold and staples are represented by gray and multiple colors, respectively; See Table S5 for the required scaffold lengths and Table S6 and Table S7 for design parameters.

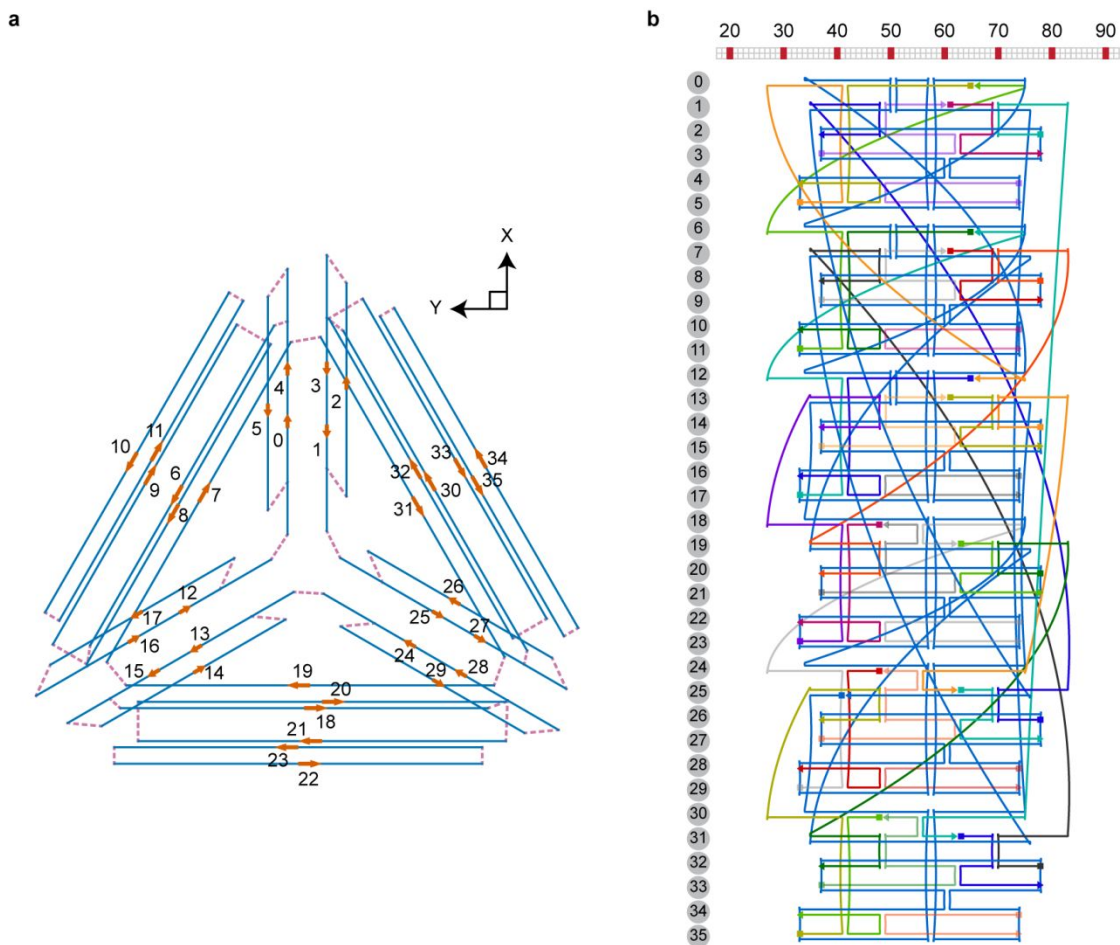

**Figure S37. JSON caDNAno for the FV tetrahedron of 42-bp edge length. (a-b) Scaffold routing model (a) and staple oligonucleotide strand and scaffold organization (b) from caDNAno. The numbers in the scaffold routing model are associated with the cross-section number in caDNAno.**

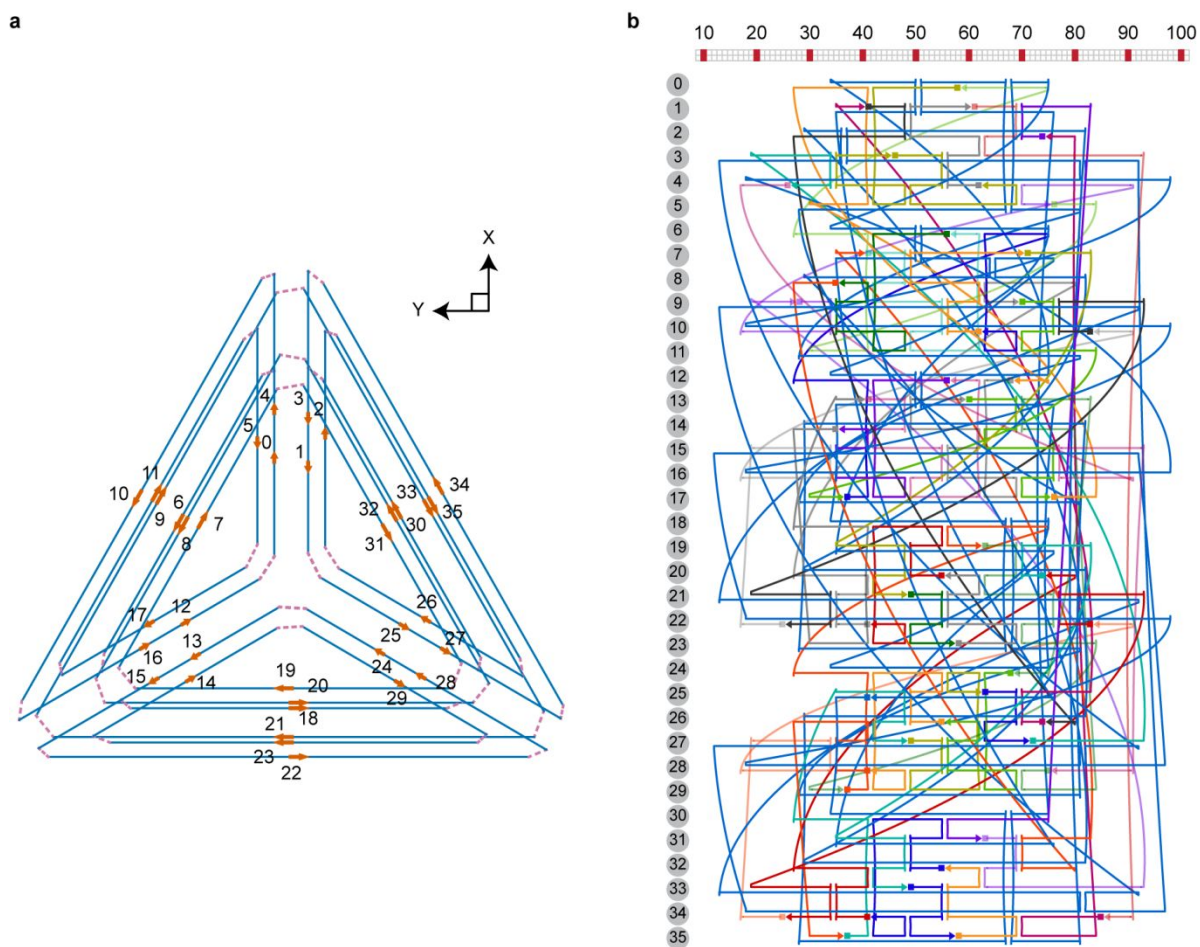

**Figure S38. JSON caDNAno for the MV tetrahedron of 42-bp edge length. (a-b) Scaffold routing model (a) and staple oligonucleotide strand and scaffold organization (b) from caDNAno. The numbers in the scaffold routing model are associated with the cross-section number in caDNAno.**

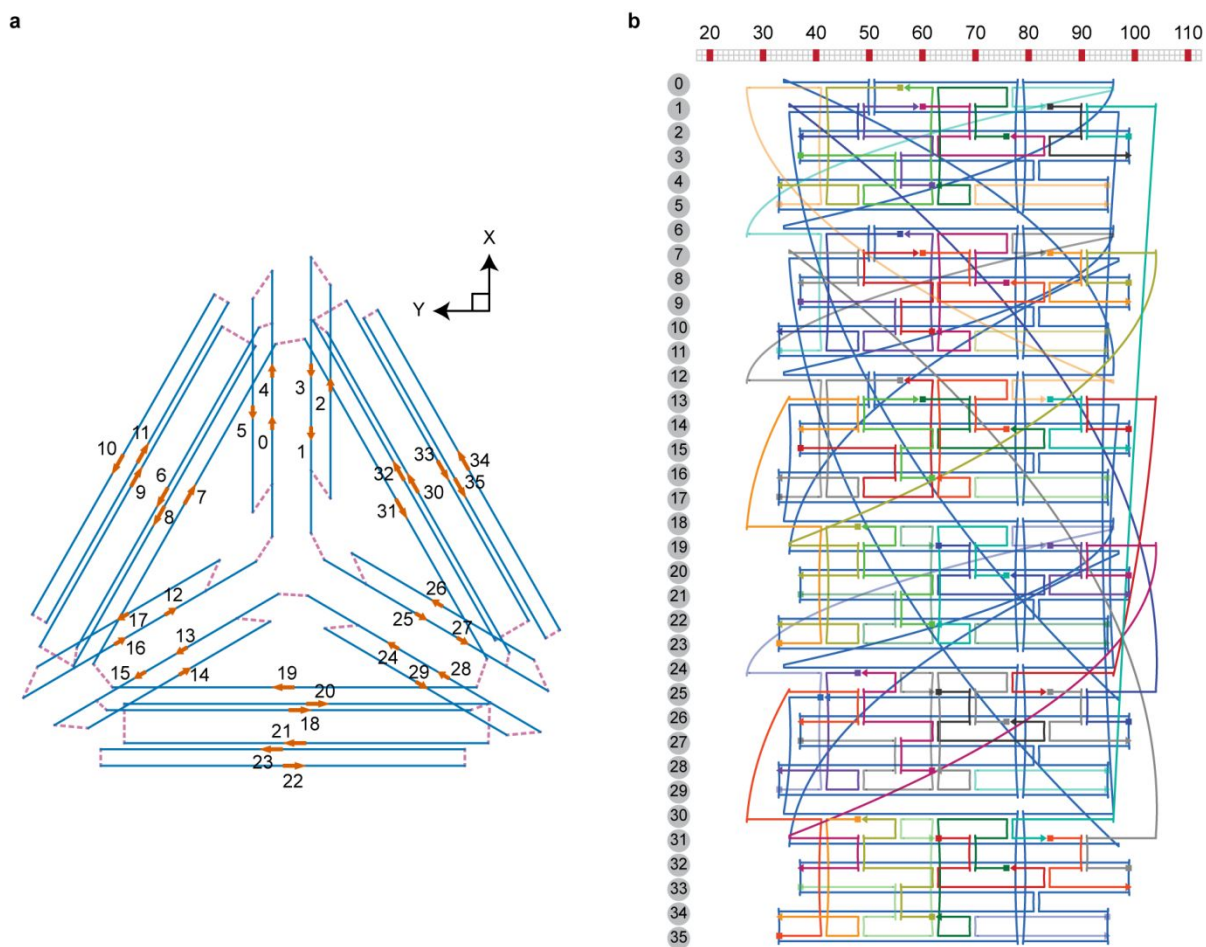

**Figure S39. JSON caDNAno for the FV tetrahedron of 63-bp edge length. (a-b) Scaffold routing model (a) and staple oligonucleotide strand and scaffold organization (b) from caDNAno.** The numbers in the scaffold routing model are associated with the cross-section number in caDNAno.



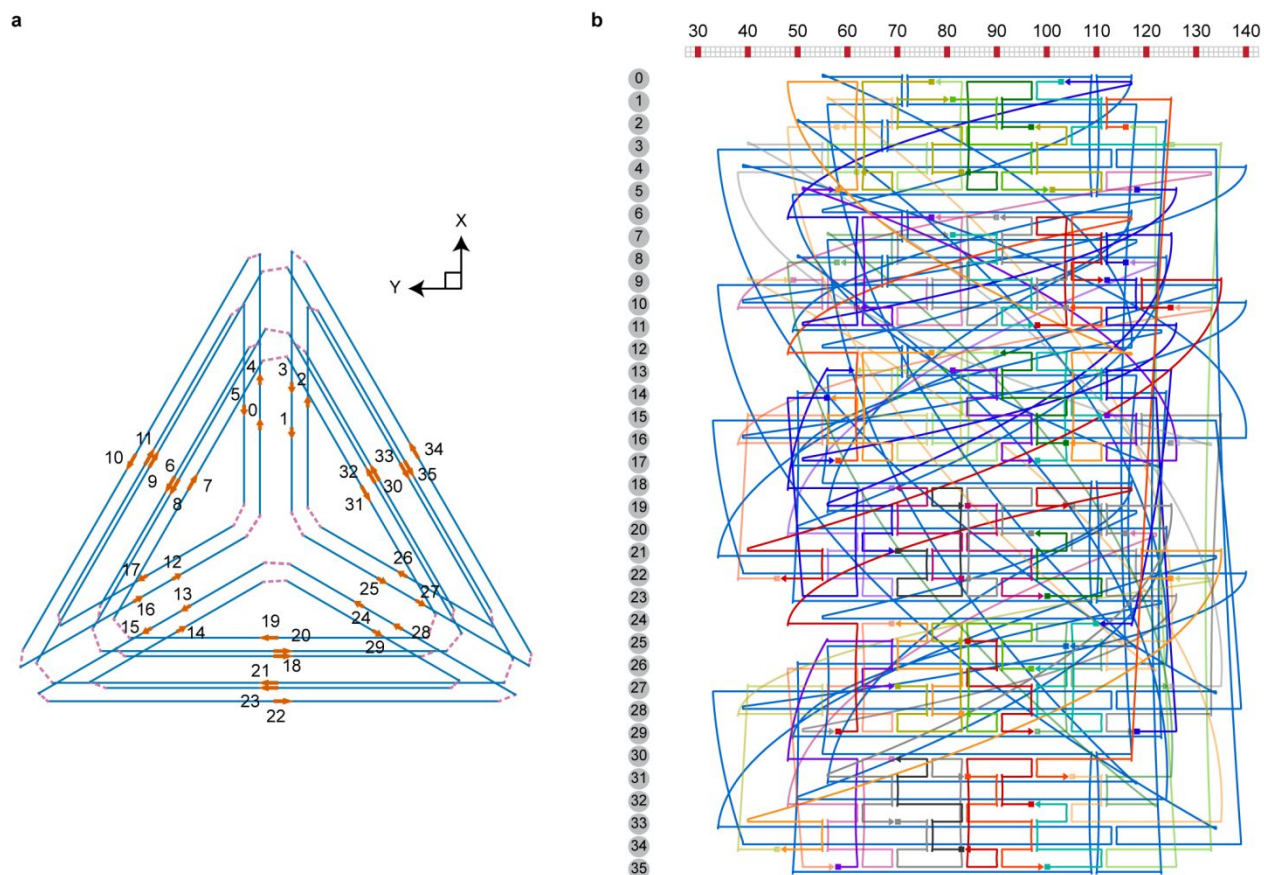

**Figure S40. JSON caDNAno for the MV tetrahedron of 63-bp edge length. (a-b) Scaffold routing model (a) and staple oligonucleotide strand and scaffold organization (b) from caDNAno. The numbers in the scaffold routing model are associated with the cross-section number in caDNAno.**

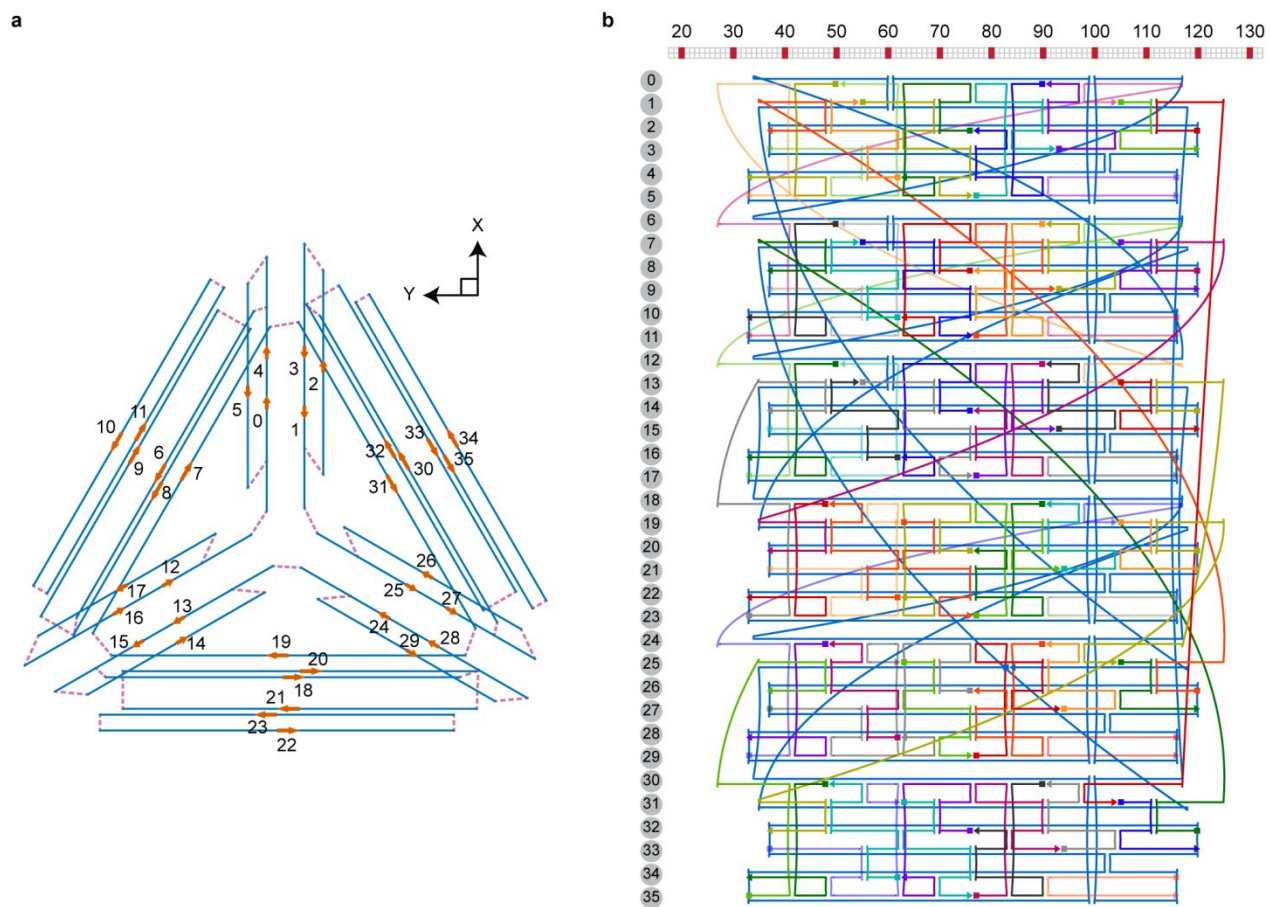

**Figure S41. JSON caDNAno for the FV tetrahedron of 84-bp edge length. (a-b) Scaffold routing model (a) and staple oligonucleotide strand and scaffold organization (b) from caDNAno. The numbers in the scaffold routing model are associated with the cross-section number in caDNAno.**

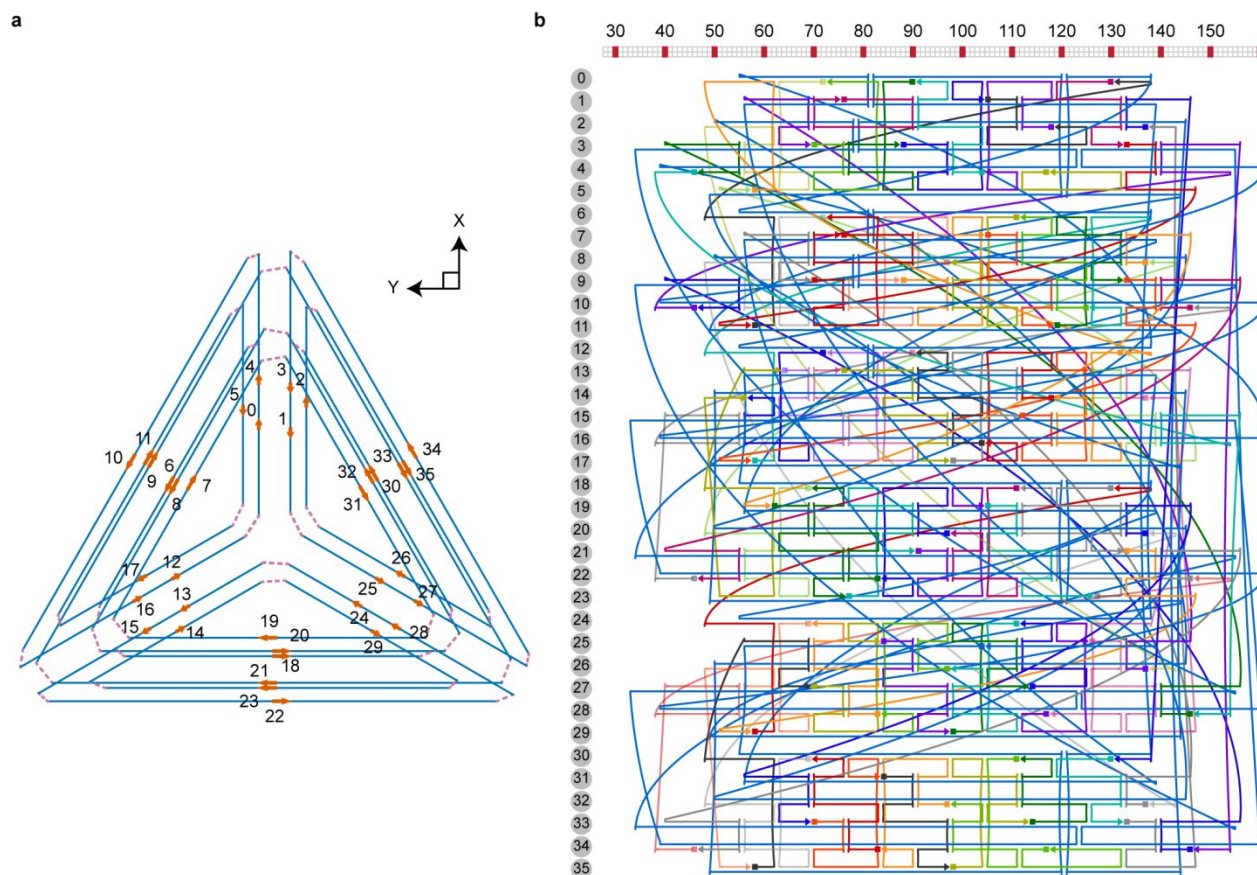

**Figure S42. JSON caDNAno for the MV tetrahedron of 84-bp edge length. (a-b) Scaffold routing model (a) and staple oligonucleotide strand and scaffold organization (b) from caDNAno. The numbers in the scaffold routing model are associated with the cross-section number in caDNAno.**

a

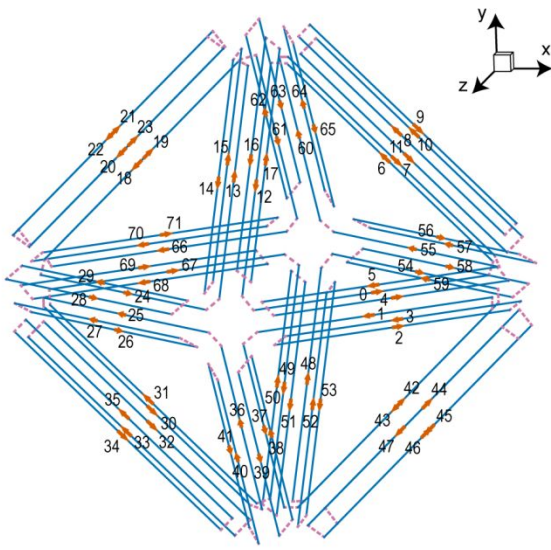

b

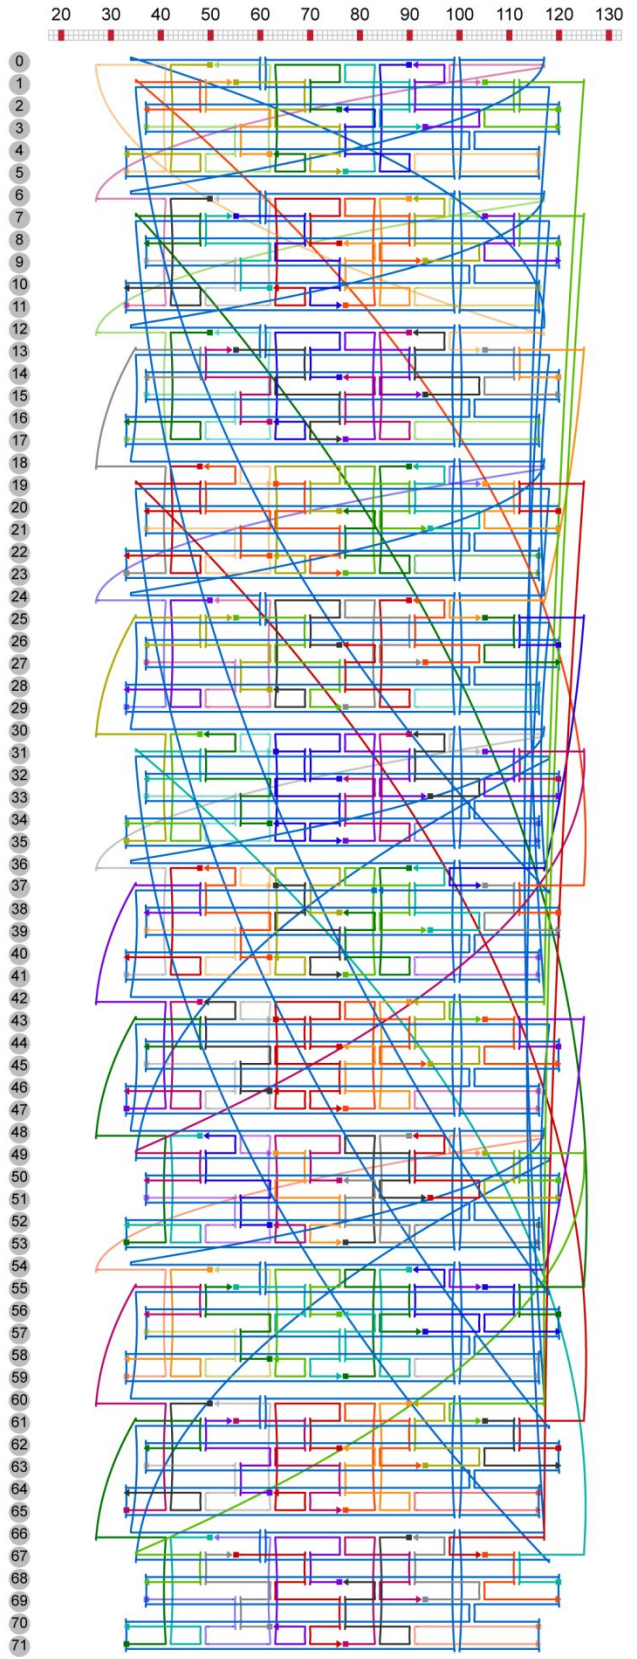

**Figure S43. JSON caDNAno for the FV octahedron of 84-bp edge length. (a-b)** Scaffold routing model **(a)** and staple oligonucleotide strand and scaffold organization **(b)** from caDNAno. The numbers in the scaffold routing model are associated with the cross-section number in caDNAno.

a

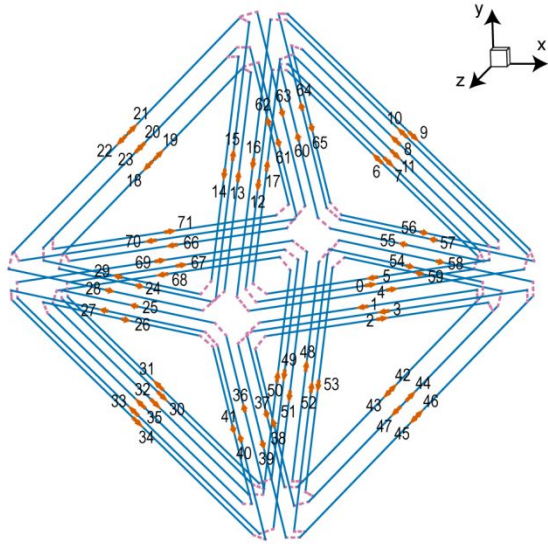

b

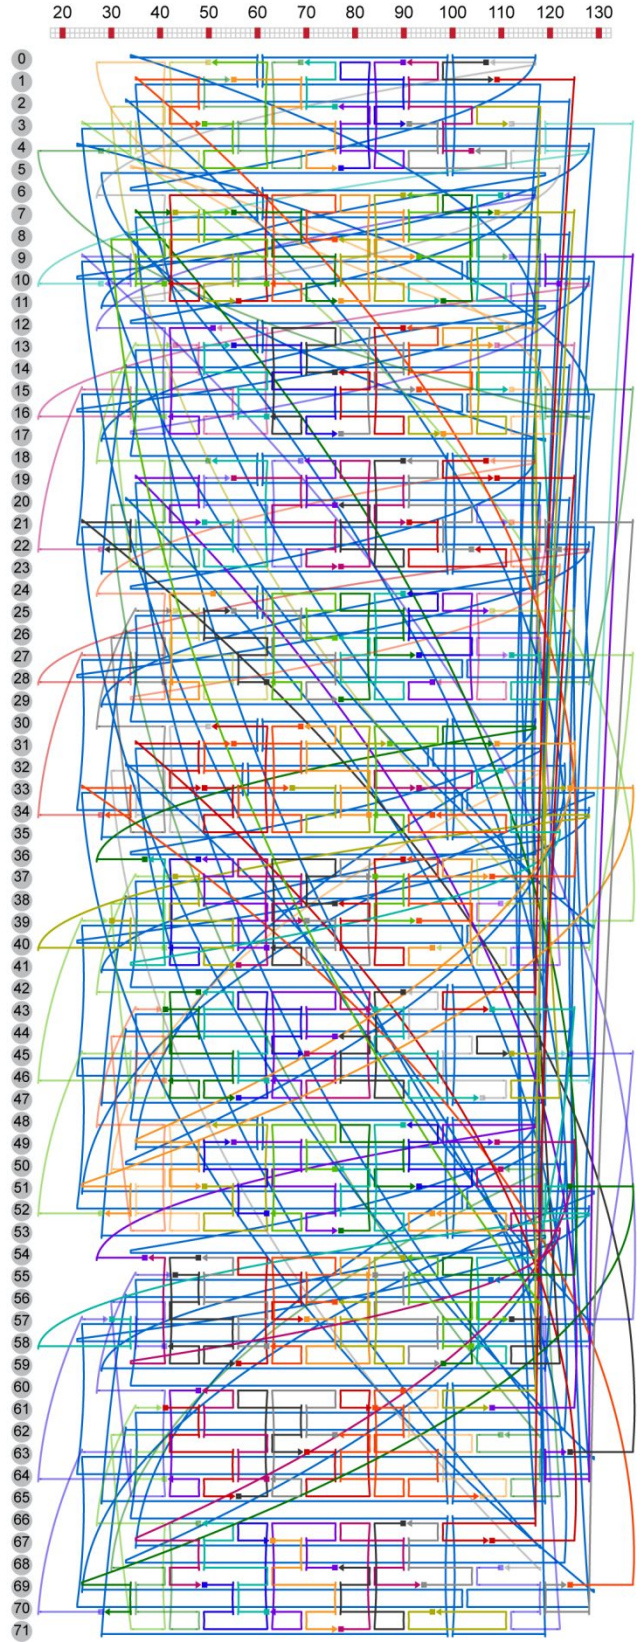

**Figure S44. JSON caDNAno for the MV octahedron of 84-bp edge length. (a-b)** Scaffold routing model **(a)** and staple oligonucleotide strand and scaffold organization **(b)** from caDNAno. The numbers in the scaffold routing model are associated with the cross-section number in caDNAno.

a

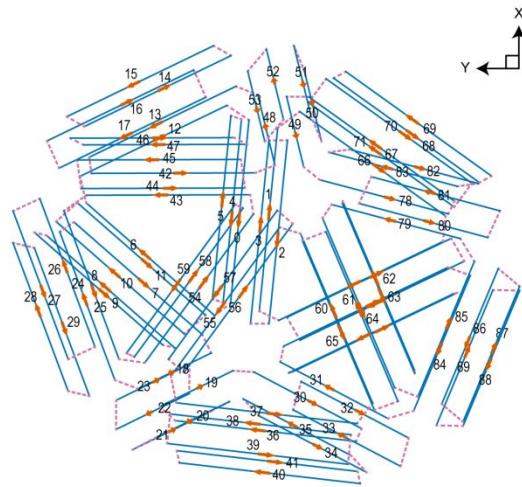

b

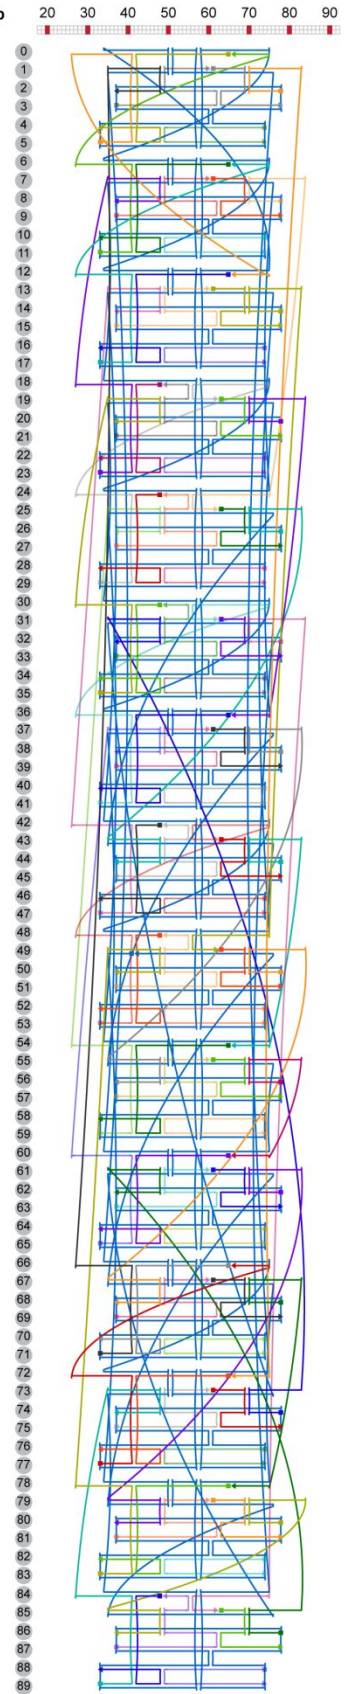



**Figure S45. JSON caDNAo for the FV pentagonal bipyramid of 42-bp edge length. (a-b)** Scaffold routing model **(a)** and staple oligonucleotide strand and scaffold organization **(b)** from caDNAo. The numbers in the scaffold routing model are associated with the cross-section number in caDNAo.

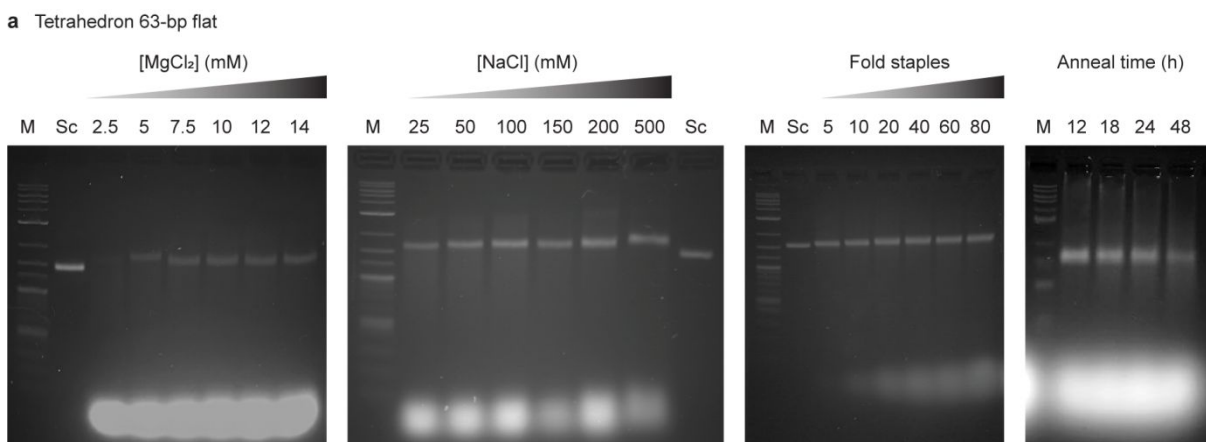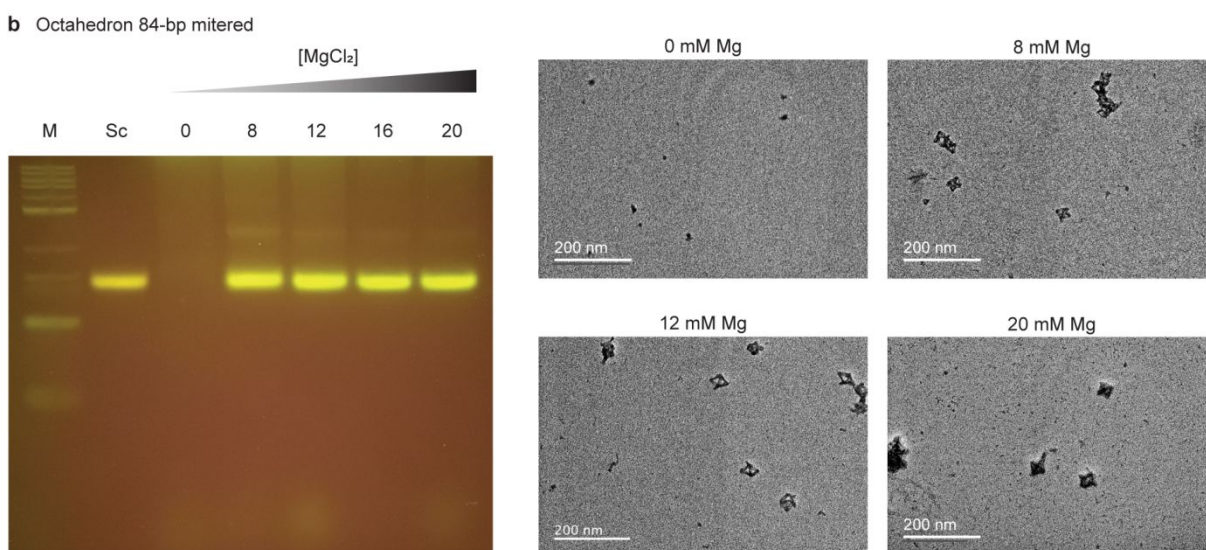

**Figure S46. Optimized folding of 6HB DNA-NPs.** (a) DNA-NP folding were assayed across MgCl<sub>2</sub>, NaCl, and staple concentrations, and annealing time, prototyped with the FV tetrahedron of 63-bp edge length. (b) DNA-NP folding were further assayed by visualizing using electron microscopy, with particles beginning to form in 8 mM MgCl<sub>2</sub>.

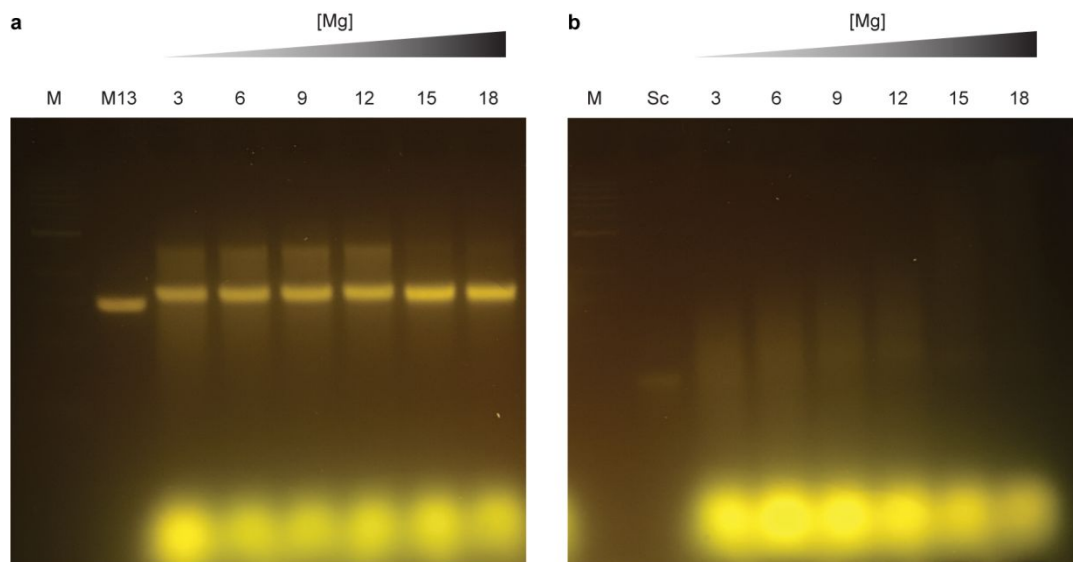

**Figure S47. Single strand full-length M13 vs. asymmetric-PCR-produced scaffold.** (a) Single-stranded M13 genomic DNA used to fold a MV tetrahedron of 42-bp edge length with increasing concentrations of  $\text{MgCl}_2$  (mM). (b) Linear, single-stranded DNA amplified from the same region of the M13 that folds to the tetrahedron. Annealing the object under the same conditions did not result in a well-folded object.

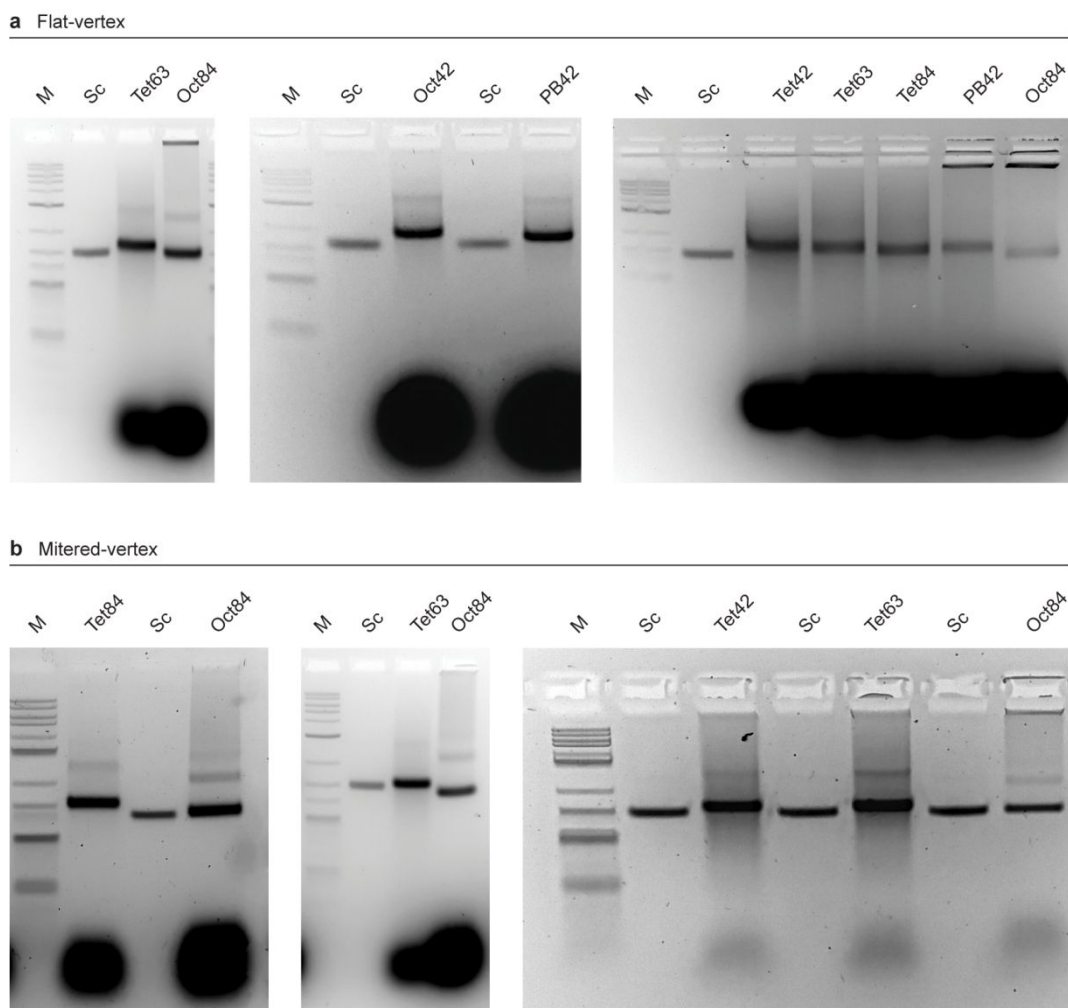

**Figure S48. Agarose gels of FV and MV DNA-NPs.** (a) FV type nanoparticles were folded and ran on a 2% agarose gel in Mg-containing buffer and compared against M13 ssDNA scaffold. (b) MV type nanoparticles were folded and ran on a 2% agarose gel in Mg-containing buffer and compared against M13 ssDNA scaffold. M: Marker (2-log ladder, NEB); Sc: genomic M13mp18 ssDNA (NEB); Tet: tetrahedron; Oct: octahedron; PB: pentagonal bipyramid; 42: 42-bp edge length, 63: 63-bp edge length; 84: 84-bp edge length.

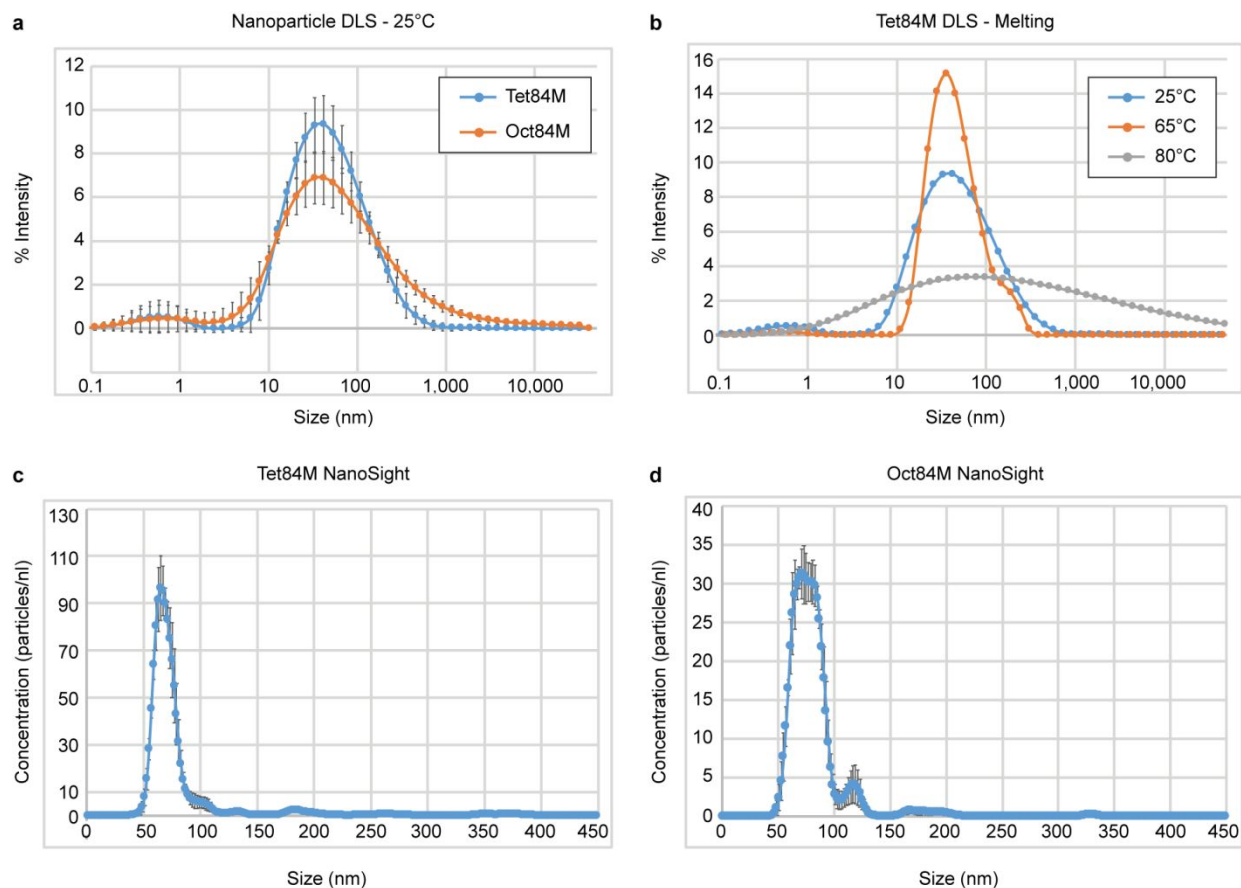

**Figure S49. Monodispersed nanoparticles shown by dynamic light scattering.** Dynamic light scattering was carried out on an MV octahedron of 84-bp edge length and a MV tetrahedron of 84-bp edge length to check monodispersity. **(a)** Particle size centered around 60 nm. **(b)** Melting of the MV tetrahedron of 84-bp edge length visualized by particle size and monodispersity. Heating the particle to 65°C reduced the particle size spread, while heating above 80°C melted the particle visualized by spreading of the particle size. **(c-d)** Nanoparticle size and uniformity was validated further by particle counting using the NanoSight, for the **(c)** MV tetrahedron 84-bp edge length and the **(d)** MV octahedron of 84-bp edge length. Movies associated with the NanoSight data are shown in Movies S1 and S2.

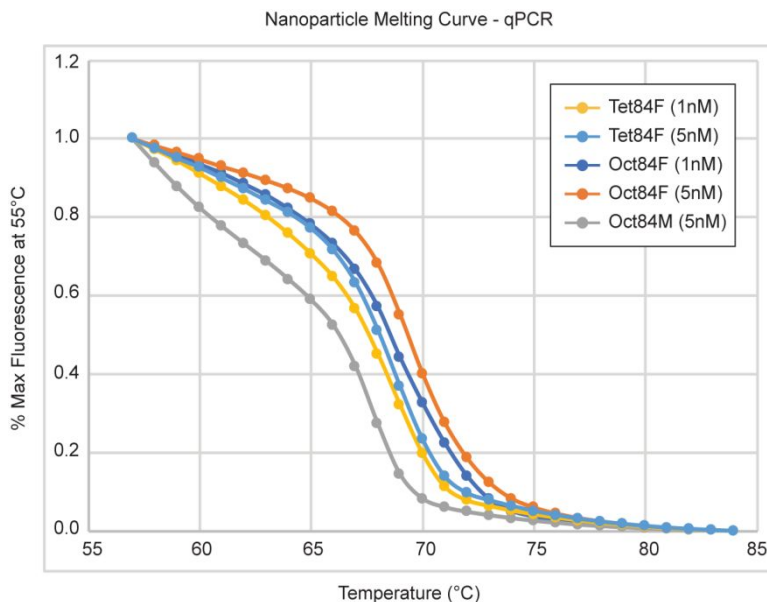

**Figure S50. Fluorescent melting curve analysis of 6HB particles.** Melting temperature was assayed by following fluorescence from SybrGreen binding to base-paired DNA. Melting temperatures were tested for the FV tetrahedron of 84-bp edge length (Tet84F), FV octahedron of 84-bp edge length (Oct84F), and MV octahedron of 84-bp edge length (Oct84M). Each curve is an average of at least four samples. The inflection point calculated by Newton's method was determined for each.

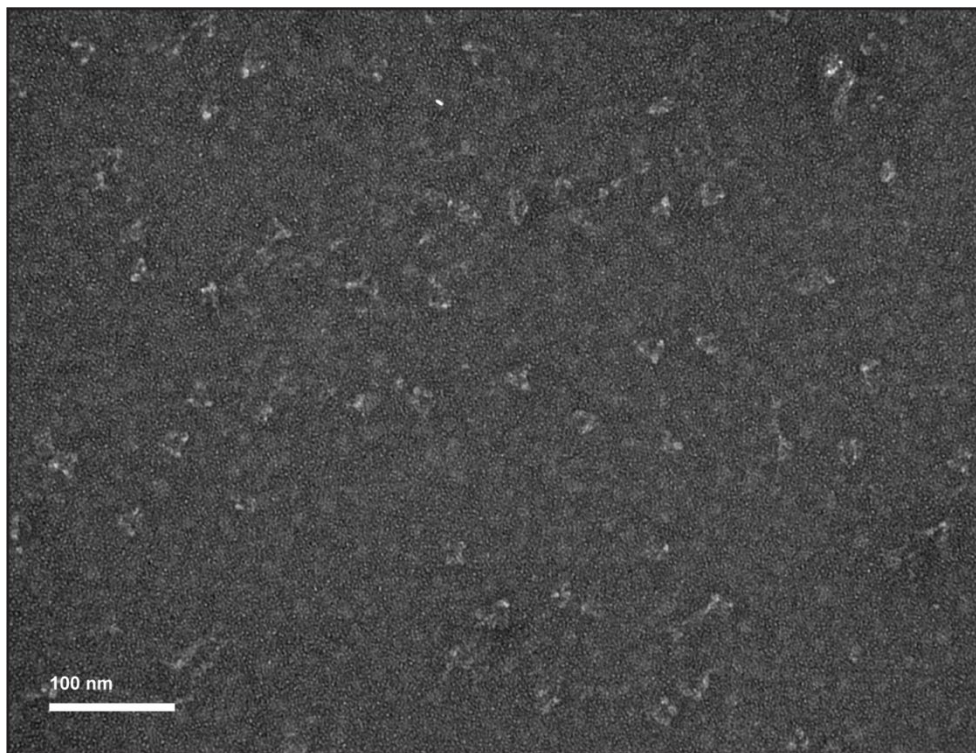

**Figure S51. TEM imaging of a FV tetrahedron of 42-bp edge length.**

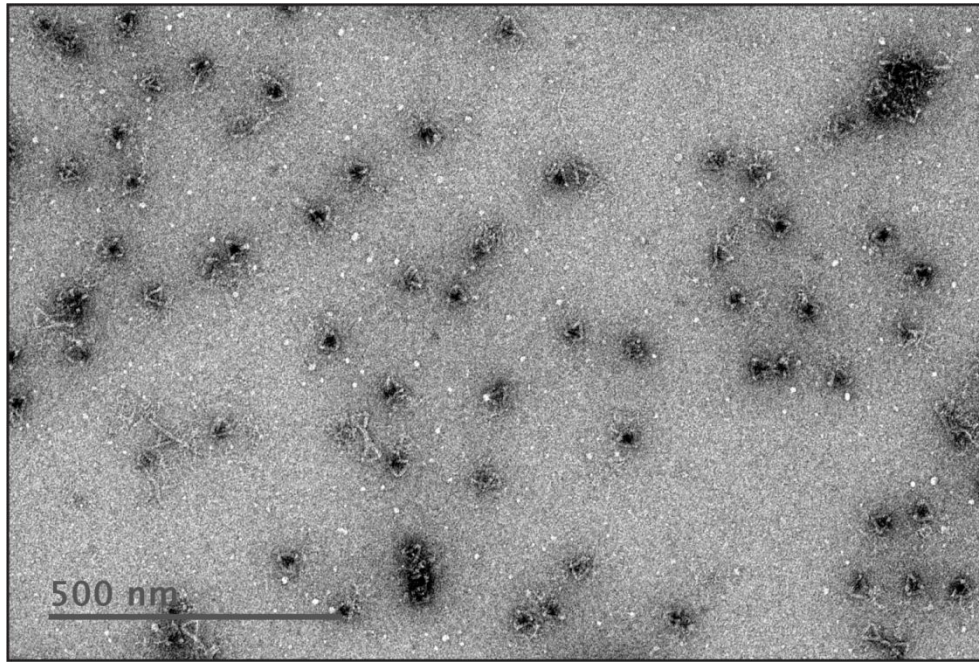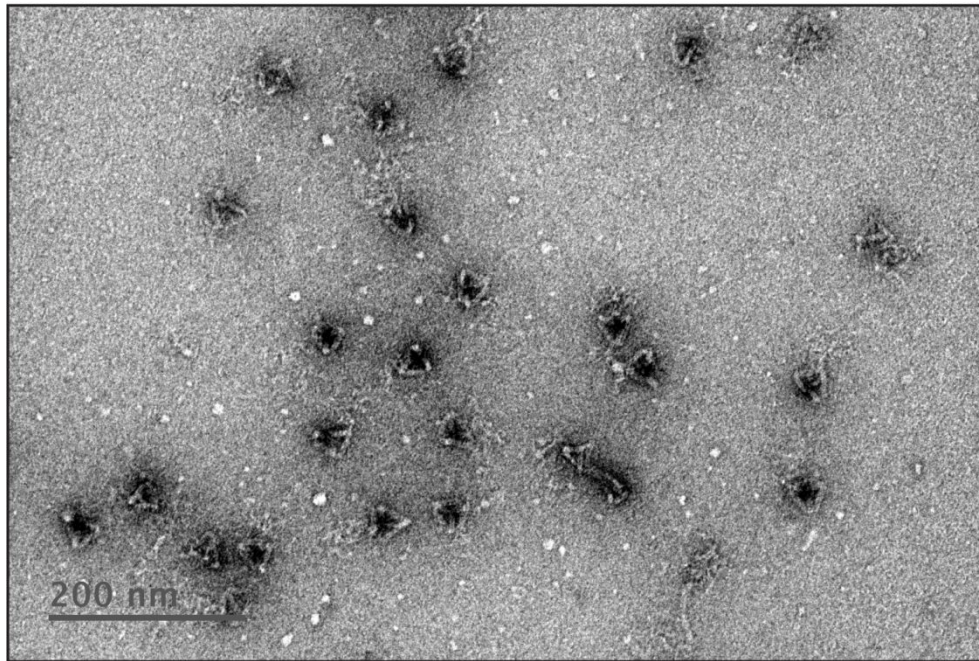

**Figure S52. TEM imaging of a FV tetrahedron of 84-bp edge length.**



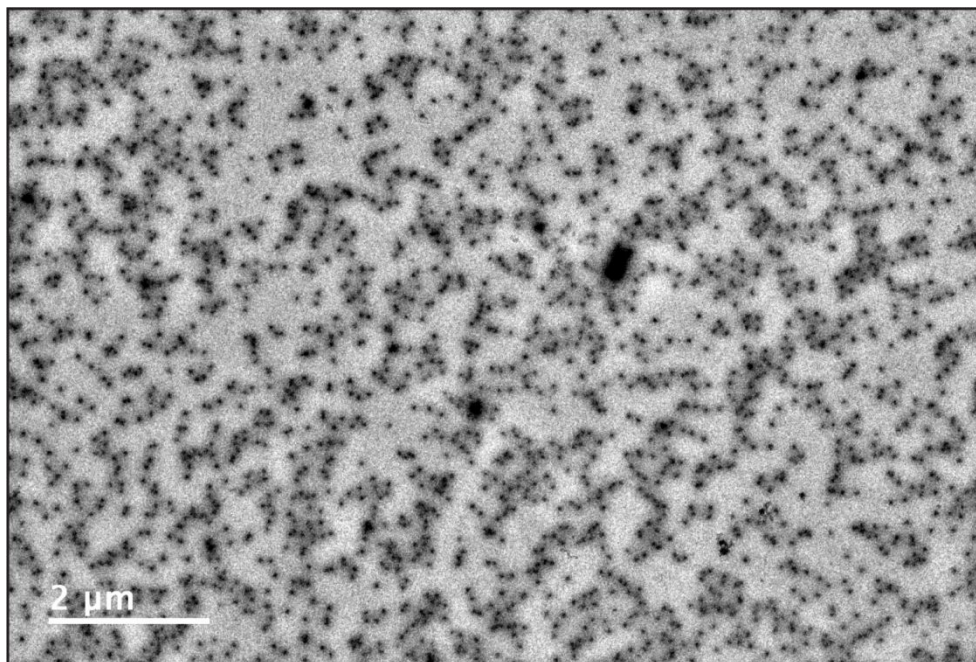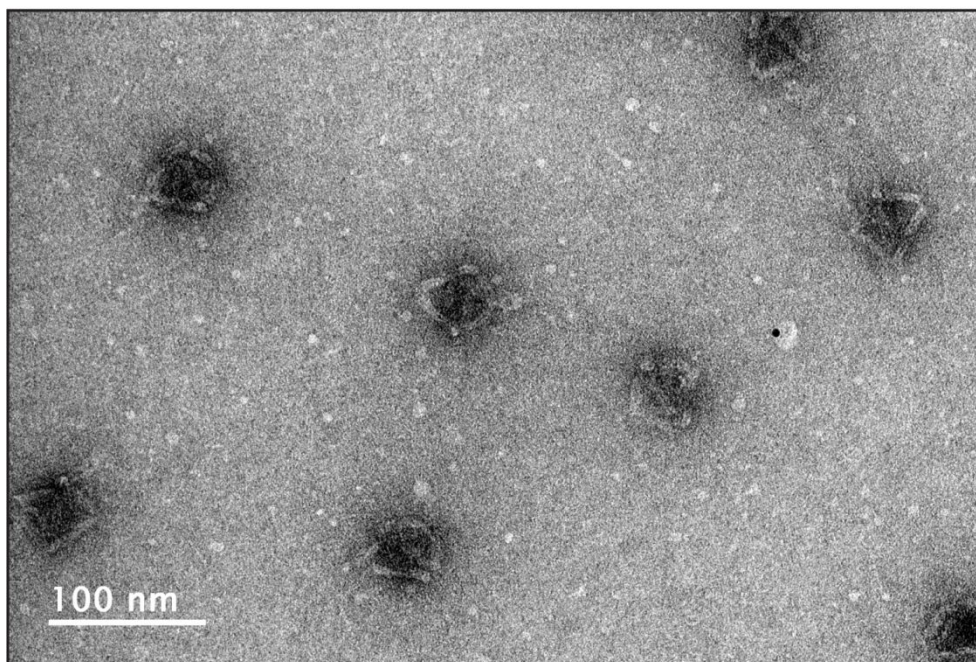

**Figure S53. TEM imaging of a FV octahedron of 84-bp edge length.**

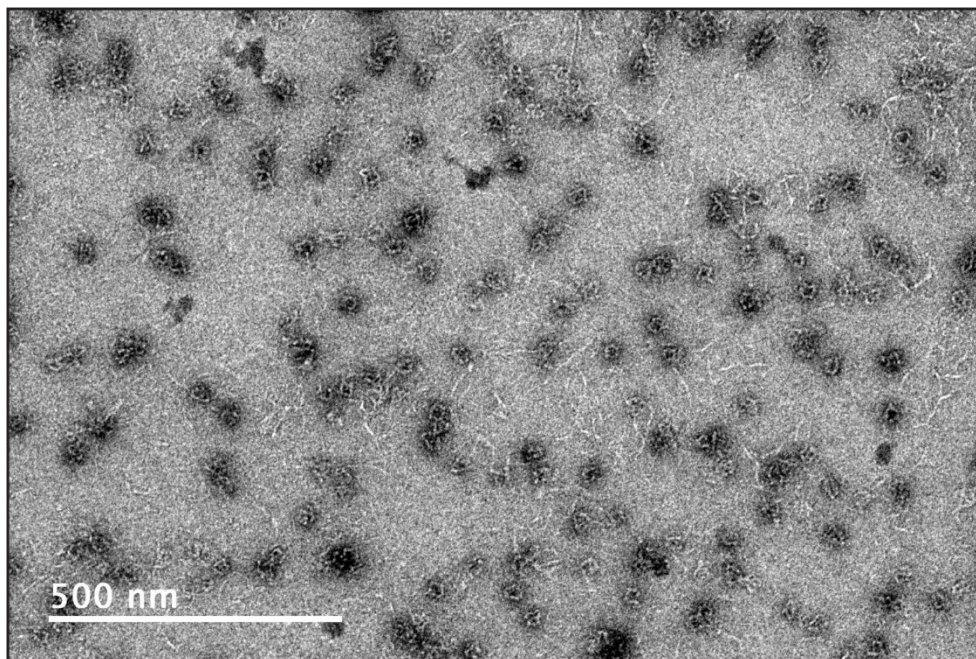

**Figure S54. TEM imaging of a FV pentagonal bipyramid of 42-bp edge length.**

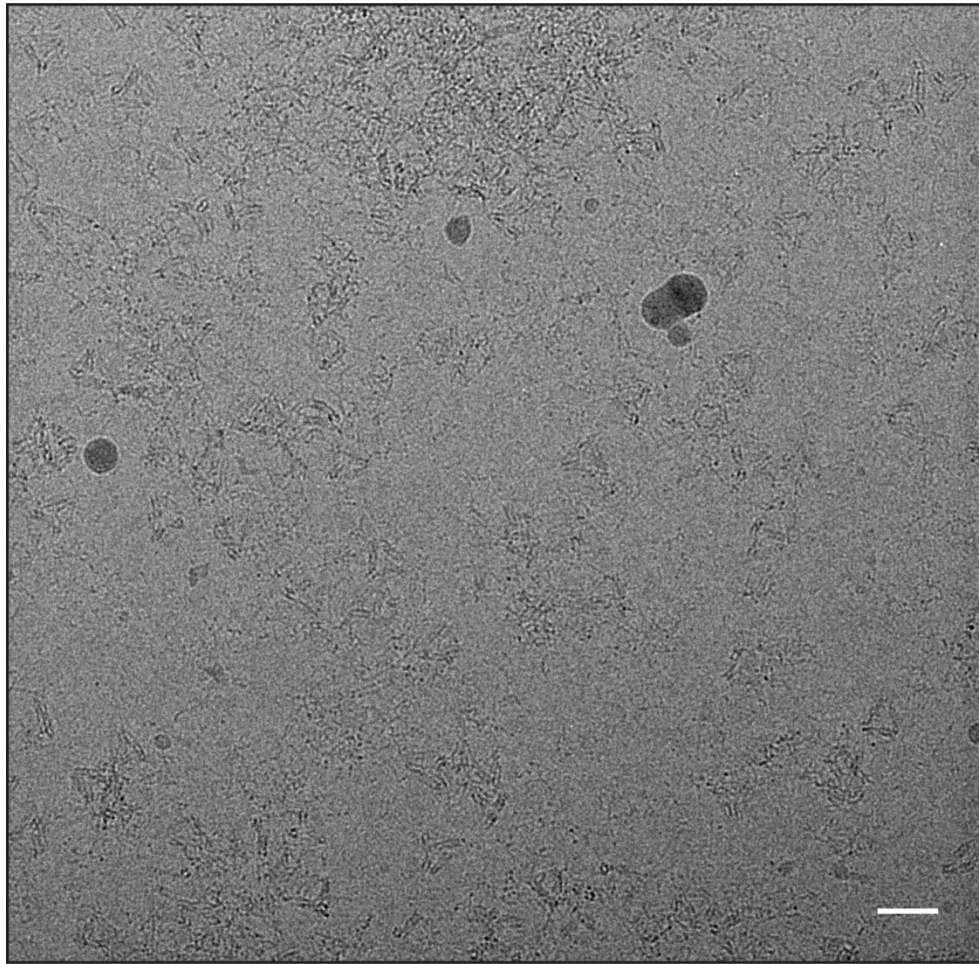

**Figure S55. Cryo-EM imaging of a FV tetrahedron of 63-bp edge length.** Electron micrograph.  
Scale bar 50 nm.

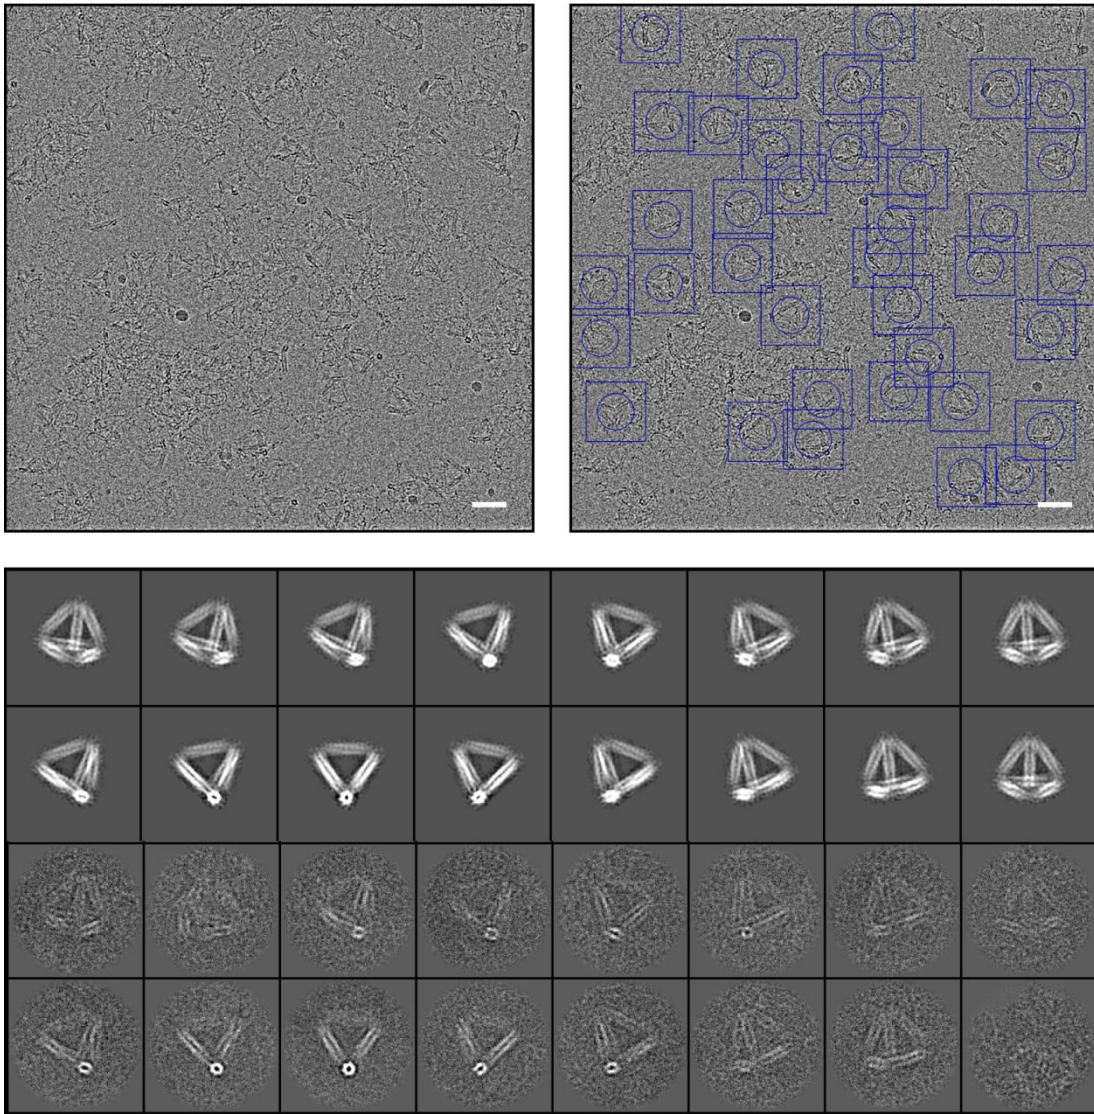

**Figure S56. Cryo-EM imaging of a FV tetrahedron of 84-bp edge length.** (Top) Example cryo-EM micrograph without and with boxed particles. Scale bar 50 nm. (Bottom) Representative class averages and corresponding projections of 3D reconstruction map.

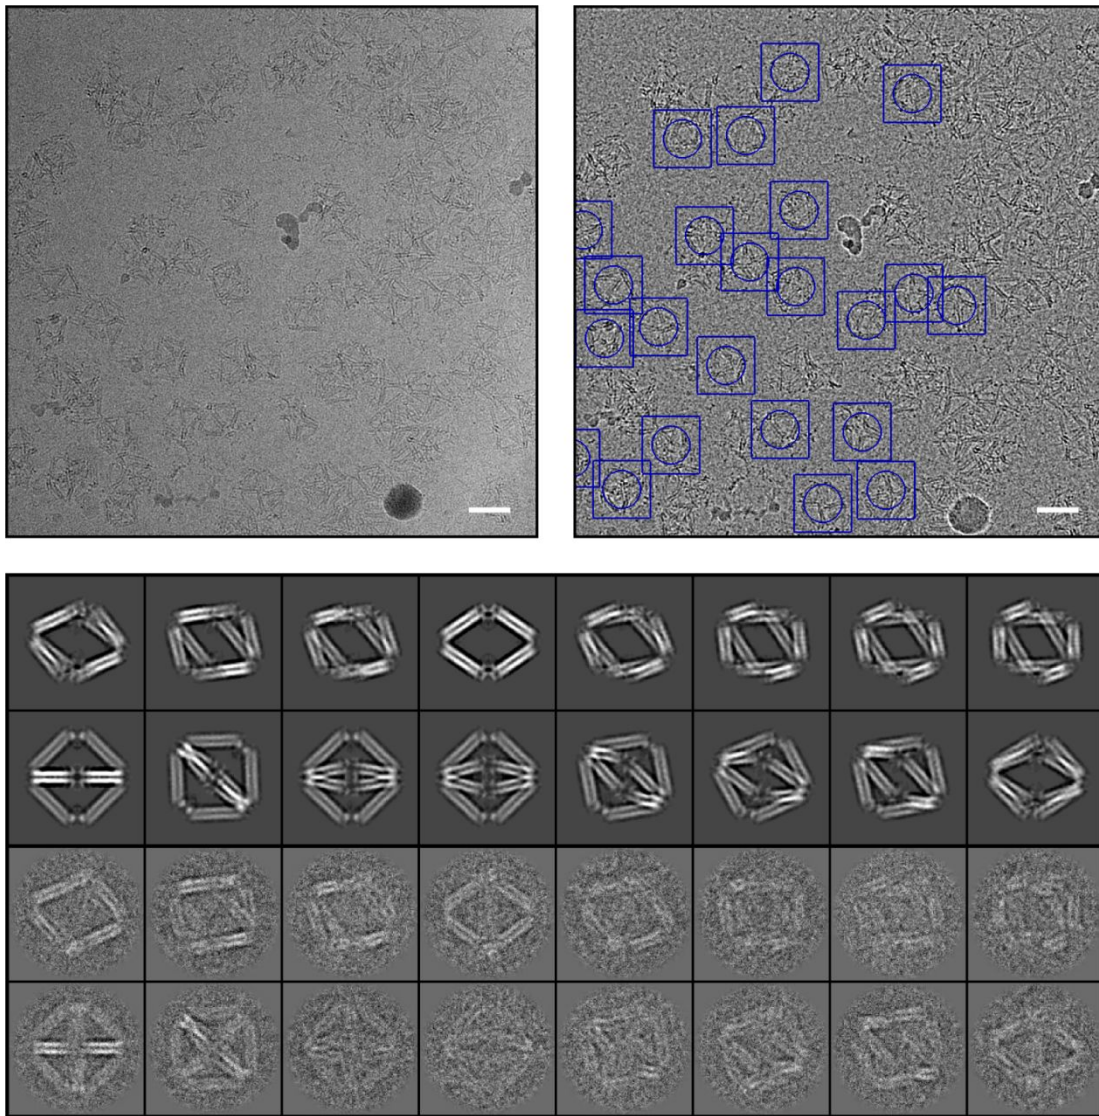

**Figure S57. Cryo-EM imaging of a FV octahedron of 84-bp edge length.** (Top) Example micrograph images showing unboxed (left) and boxed (right) particles. Scale bar 50 nm. (Bottom) Representative class averages and corresponding projections of 3D reconstruction map.

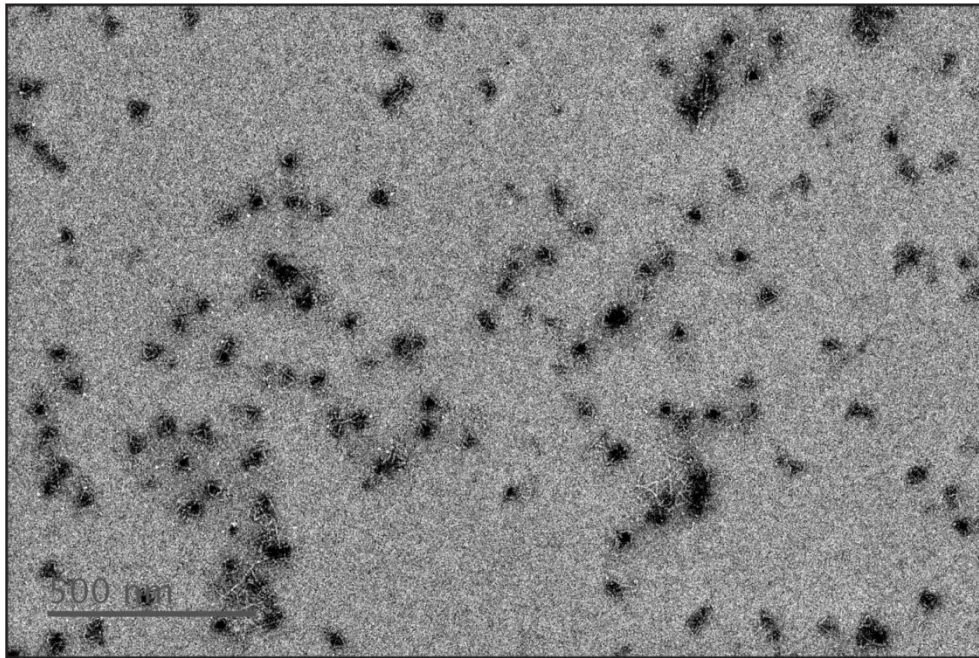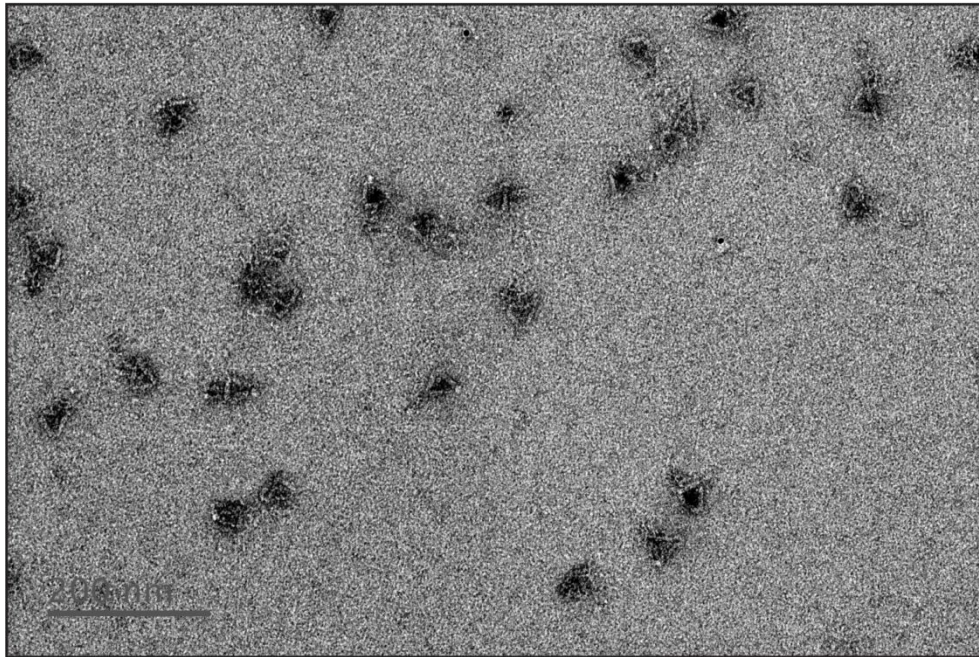

**Figure S58. TEM imaging of a MV tetrahedron of 84-bp edge length.**

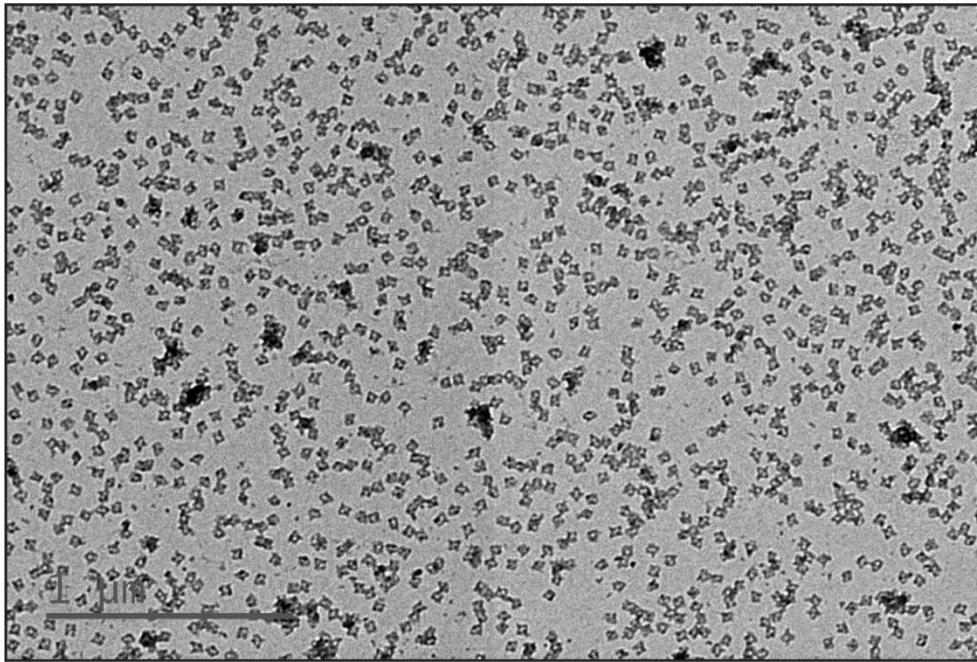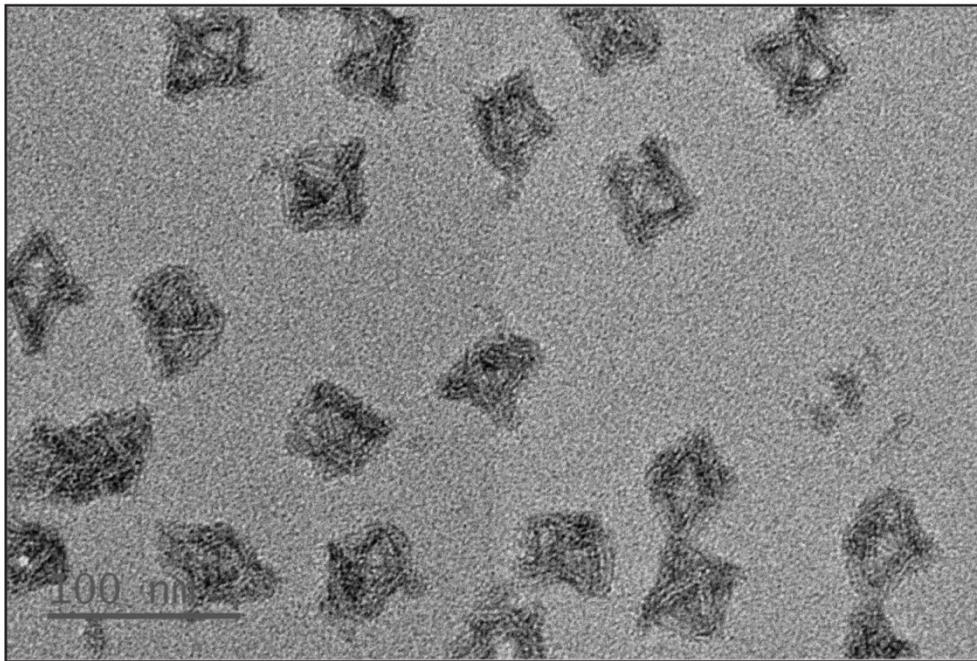

**Figure S59. TEM imaging of a MV octahedron of 84-bp edge length.**

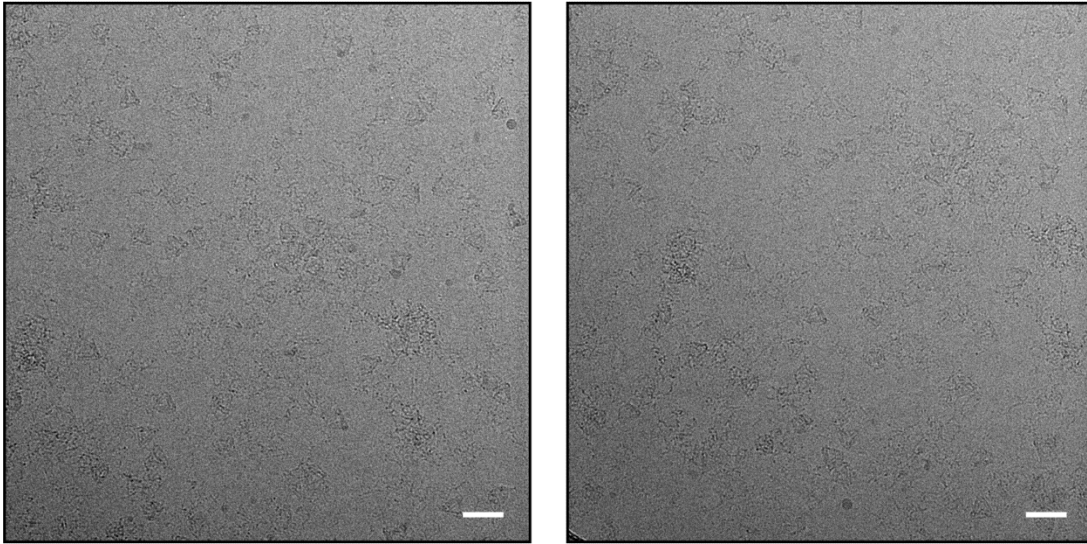

**Figure S60. Cryo-EM imaging of a MV tetrahedron of 42-bp edge length.** Two micrographs showing folded tetrahedra. Scale bar 50 nm.



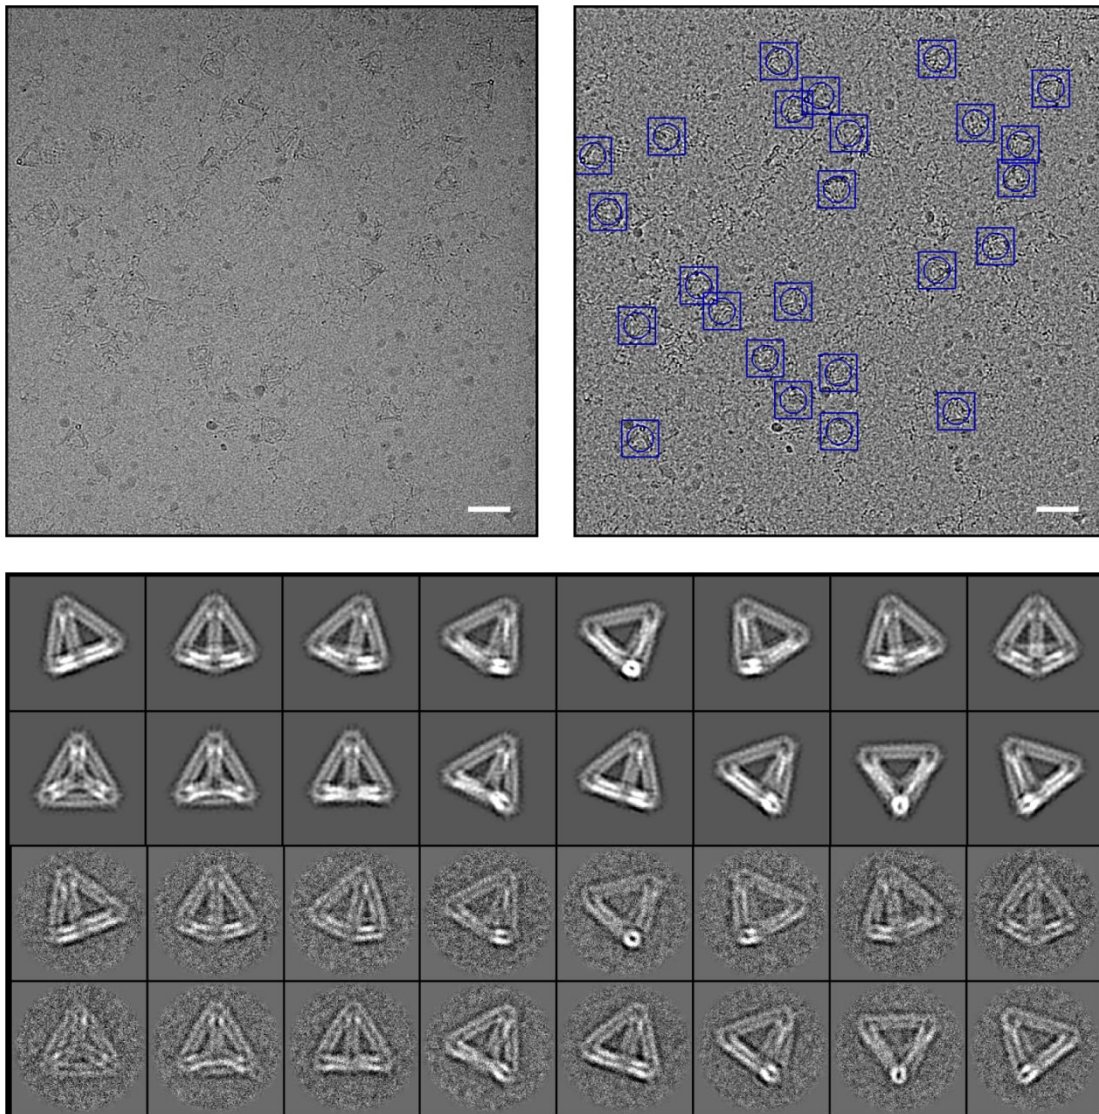

**Figure S61. Cryo-EM imaging of a MV tetrahedron of 63-bp edge length.** (Top) Example micrograph images showing unboxed (left) and boxed (right) particles. Scale bar 50 nm. (Bottom) Representative class averages and corresponding projections of 3D reconstruction map.

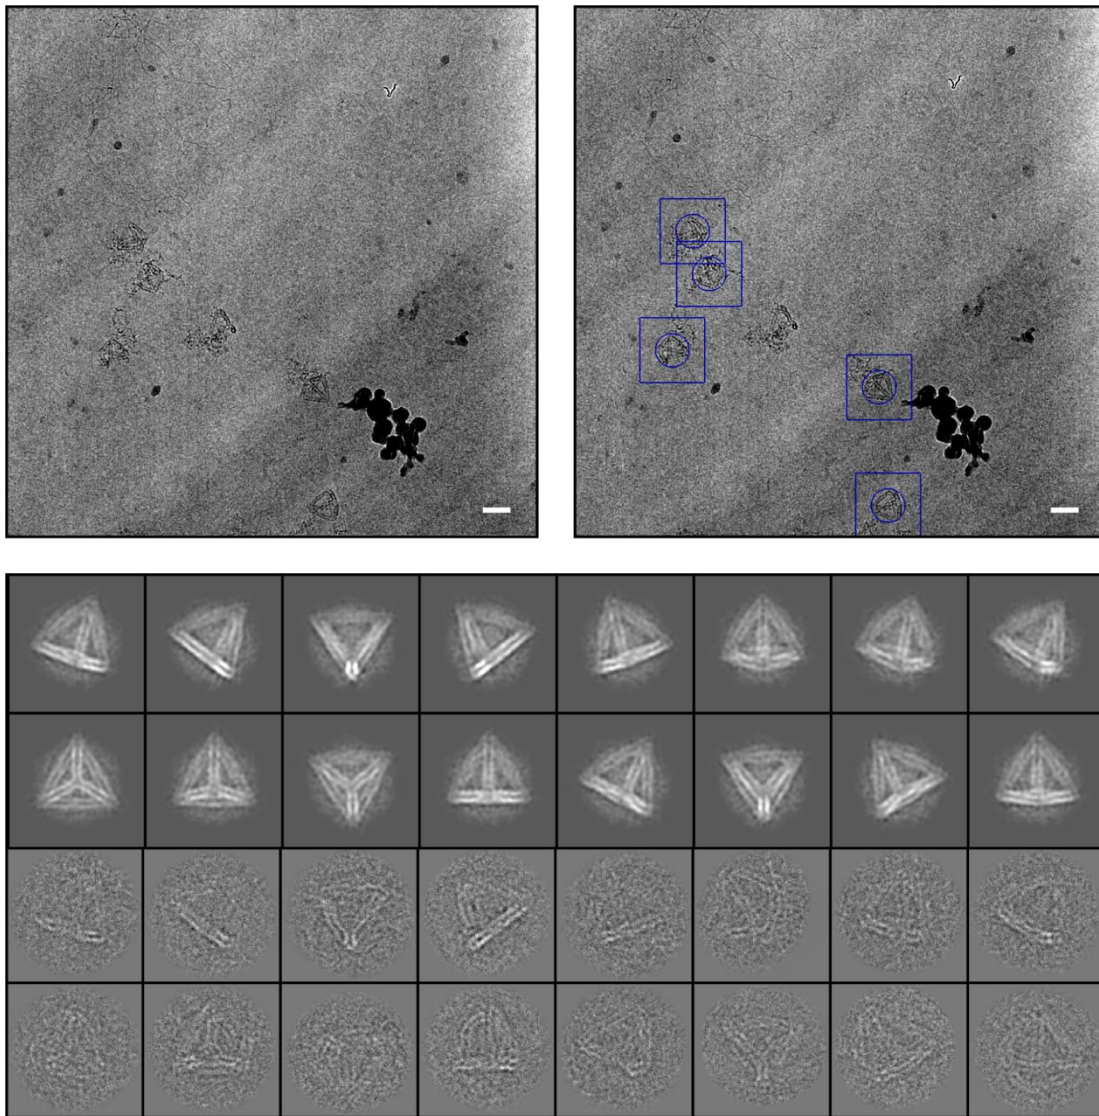

**Figure S62. Cryo-EM imaging of a MV tetrahedron of 84-bp edge length.** (Top) Example micrograph images showing unboxed (left) and boxed (right) particles. Scale bar 50 nm. (Bottom) Representative class averages and corresponding projections of 3D reconstruction map.

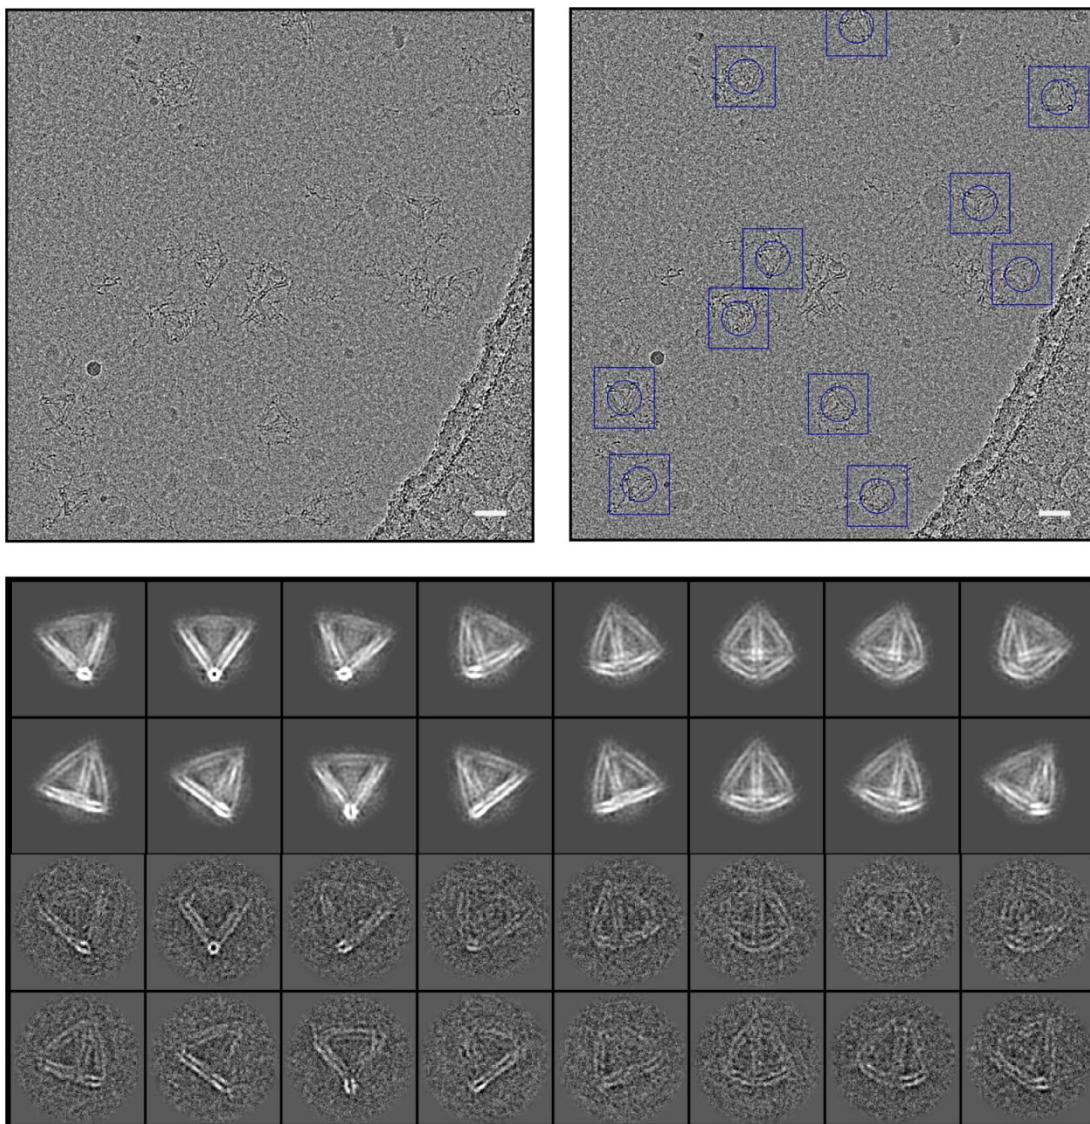

**Figure S63. Cryo-EM imaging of a MV tetrahedron of 84-bp edge length using the middle layer for connection scaling.** (Top) Example micrograph images showing unboxed (left) and boxed (right) particles. Scale bar 50 nm. (Bottom) Representative class averages and corresponding projections of 3D reconstruction map.

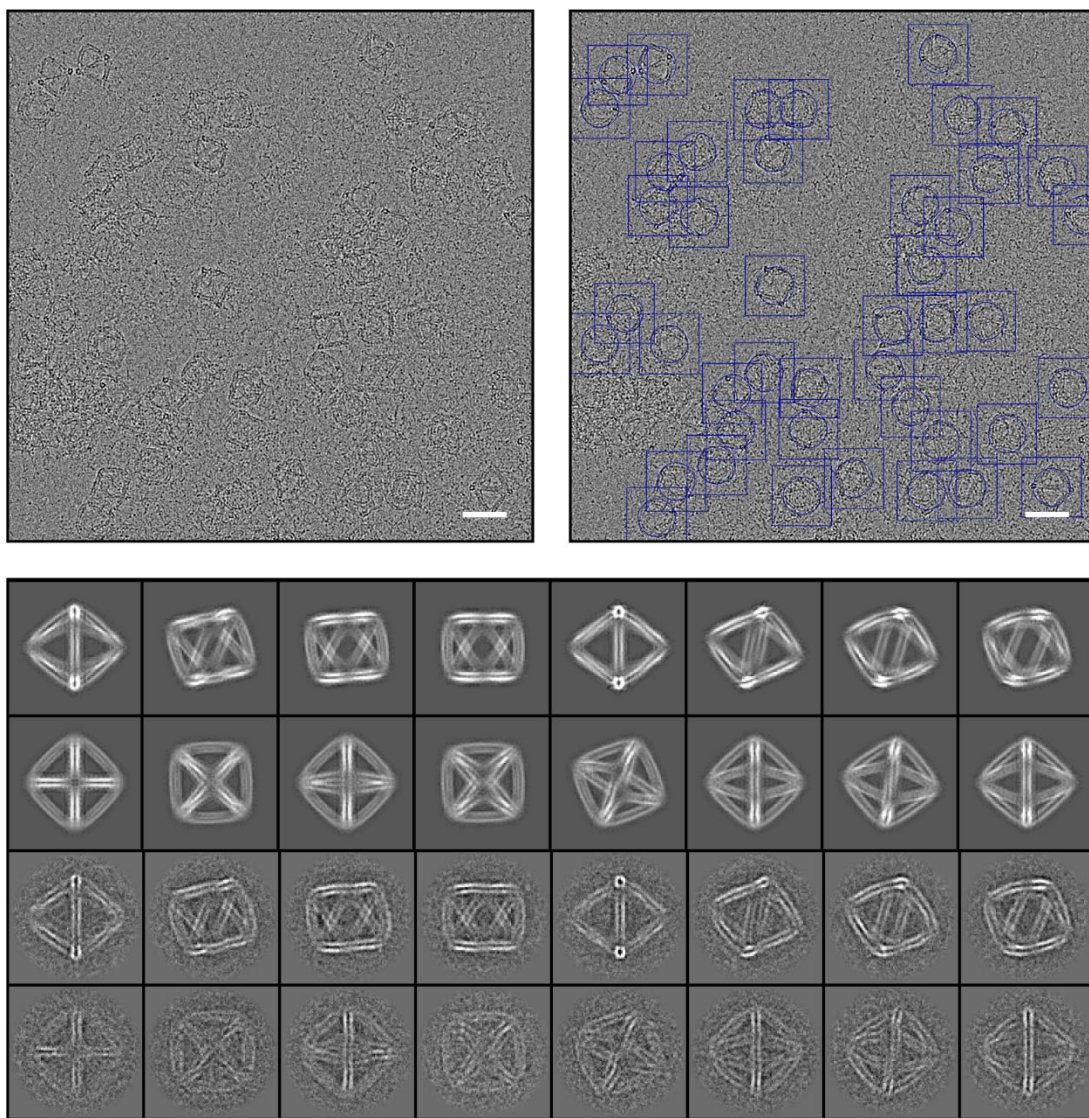

**Figure S64. Cryo-EM imaging of the MV octahedron of 84-bp edge length.** (Top) Example micrograph images showing unboxed (left) and boxed (right) particles. Scale bar 50 nm. (Bottom) Representative class averages and corresponding projections of 3D reconstruction map.

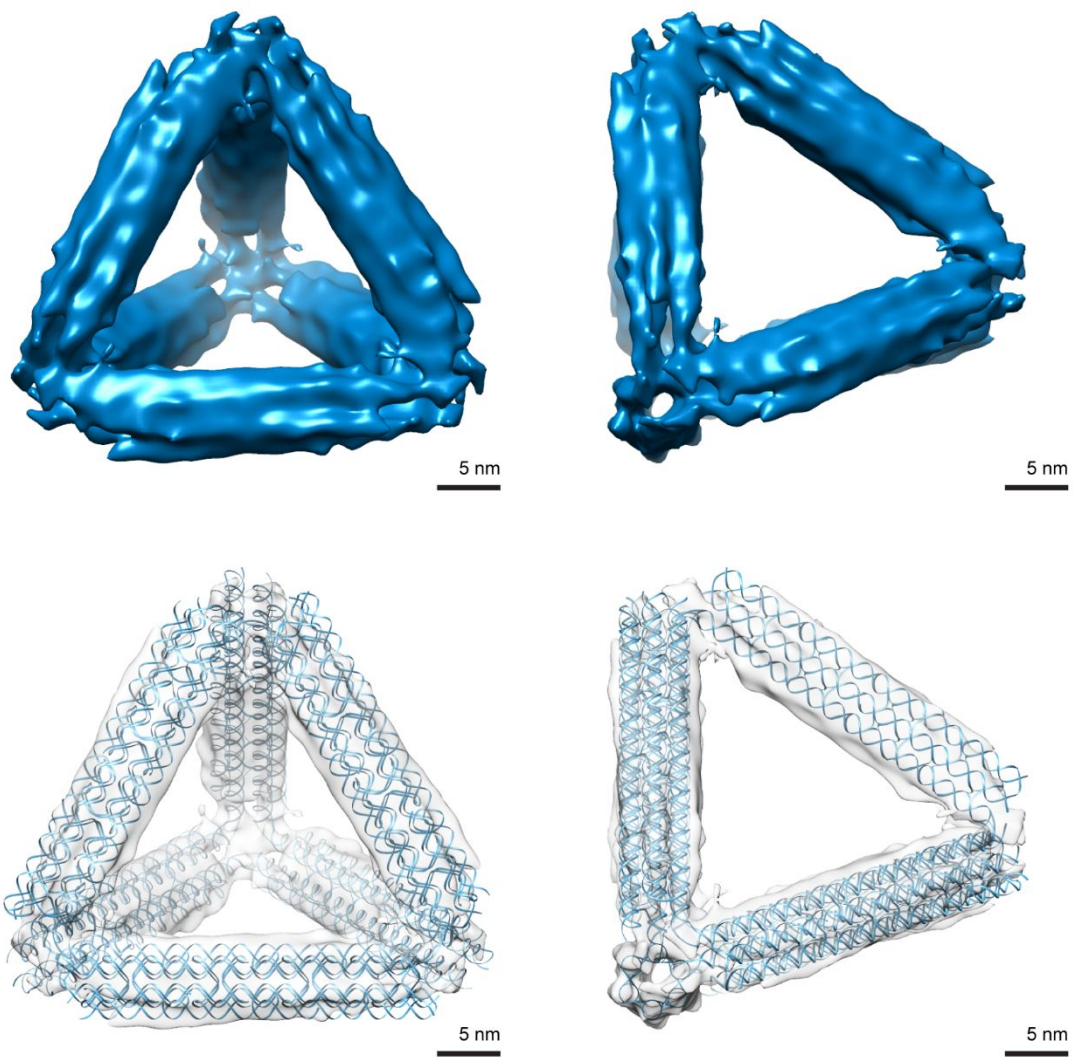

**Figure S65. 3D structure characterization of the FV tetrahedron of 84-bp edge length using cryo-EM reconstruction and comparison with model predictions. Movie is shown in Movie S3.**

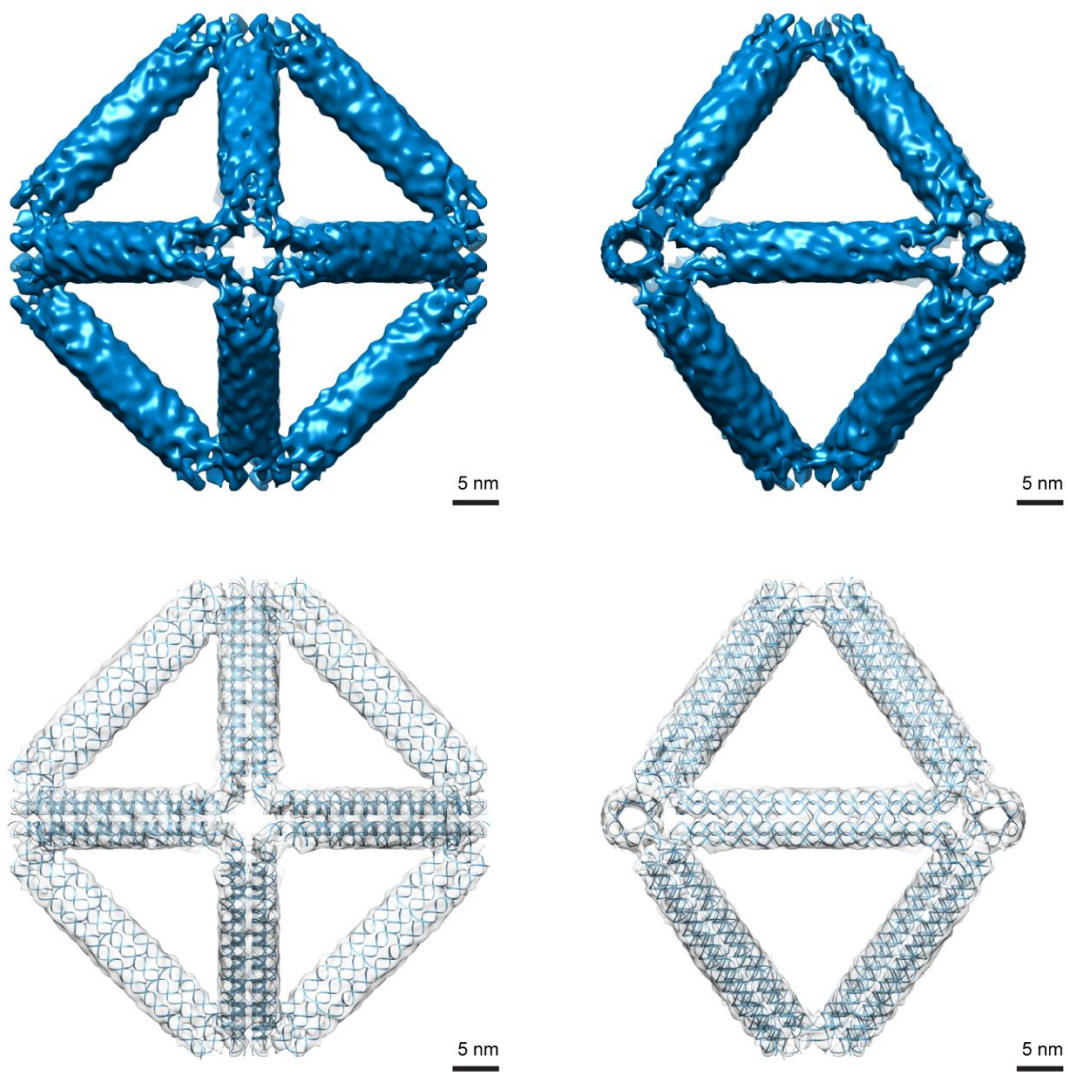

**Figure S66. 3D structure characterization of the FV octahedron of 84-bp edge length using cryo-EM reconstruction and comparison with model predictions. Movie is shown in Movie S4.**

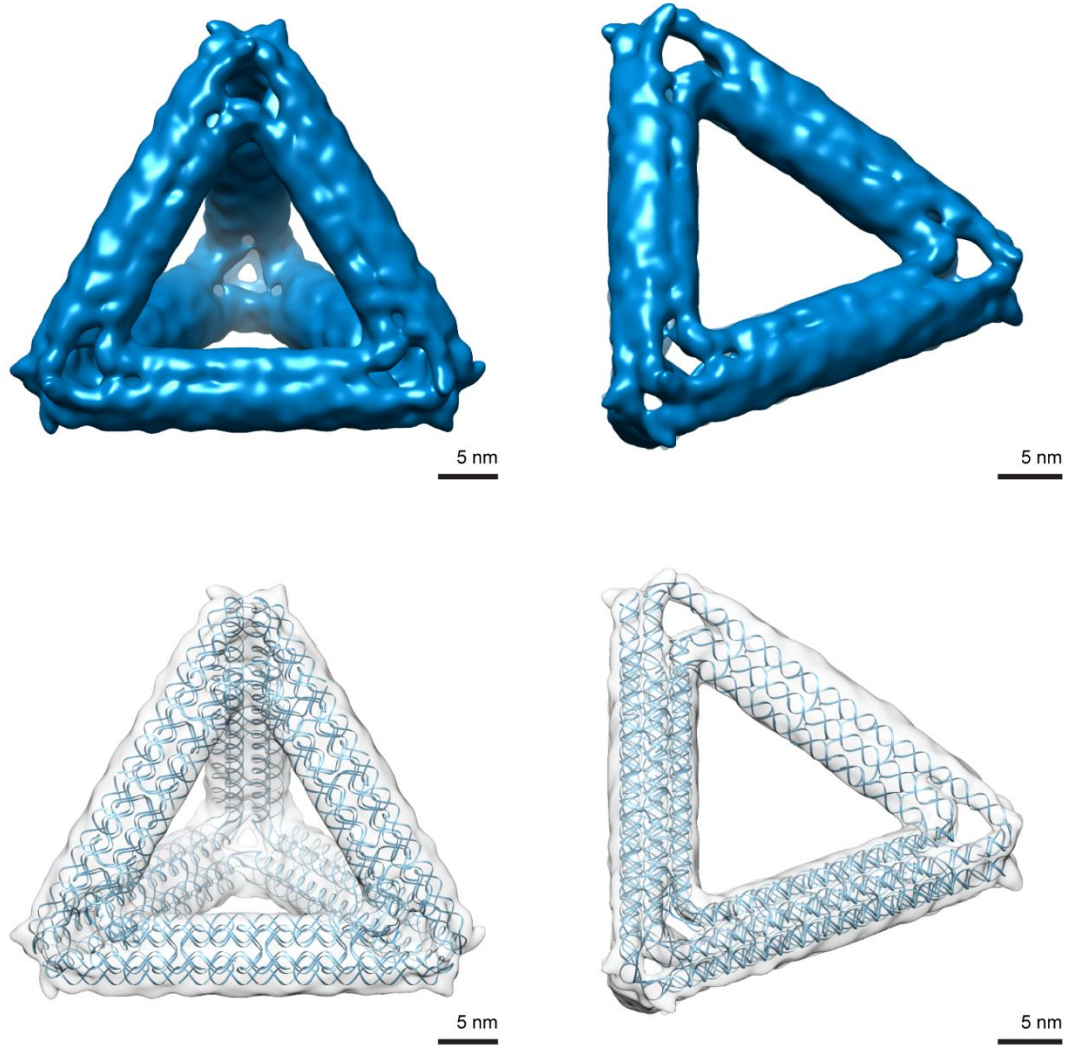

**Figure S67. 3D structure characterization of the MV tetrahedron of 63-bp edge length using cryo-EM reconstruction and comparison with model predictions.**

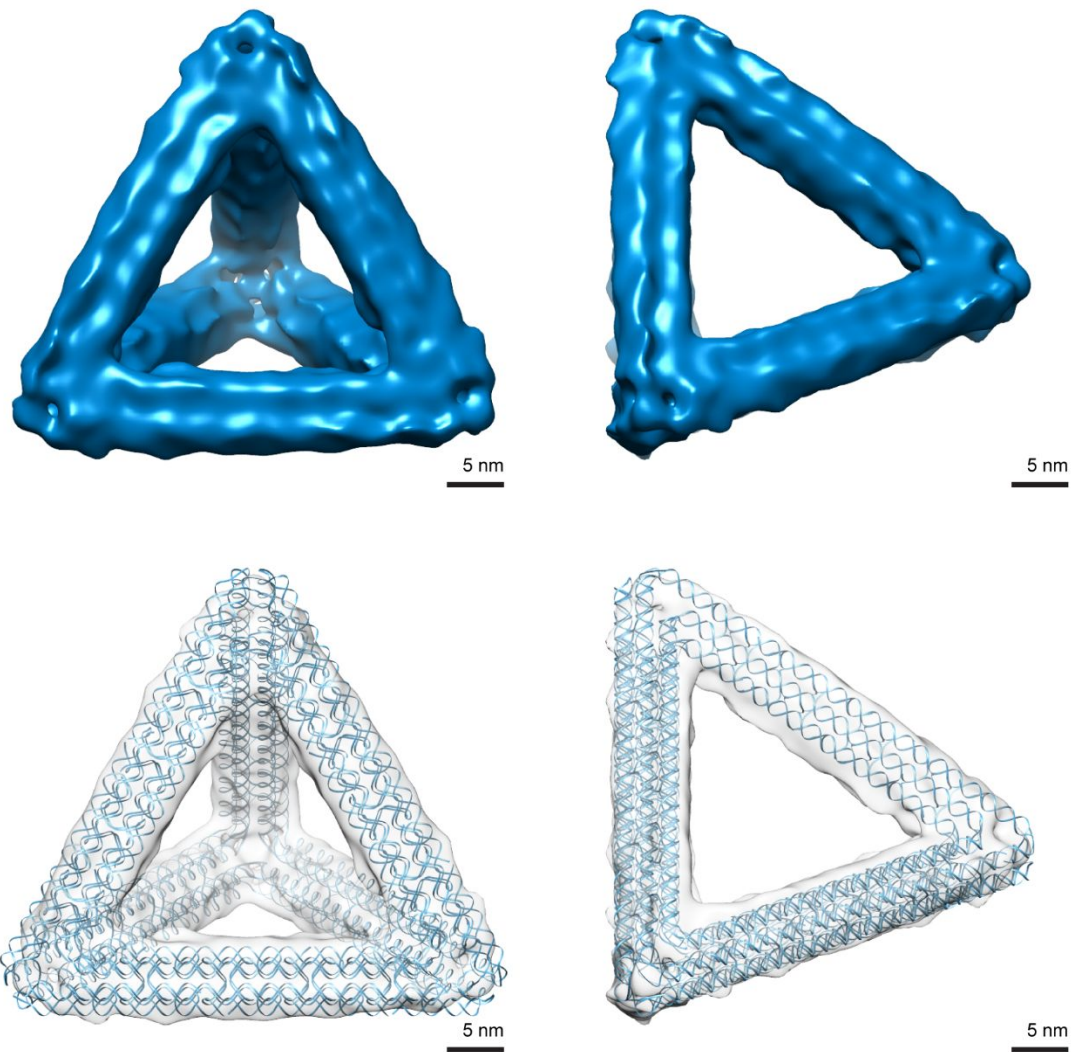

**Figure S68. 3D structure characterization of the MV tetrahedron of 84-bp edge length using cryo-EM reconstruction and comparison with model predictions. Movie is shown in Movie S5.**



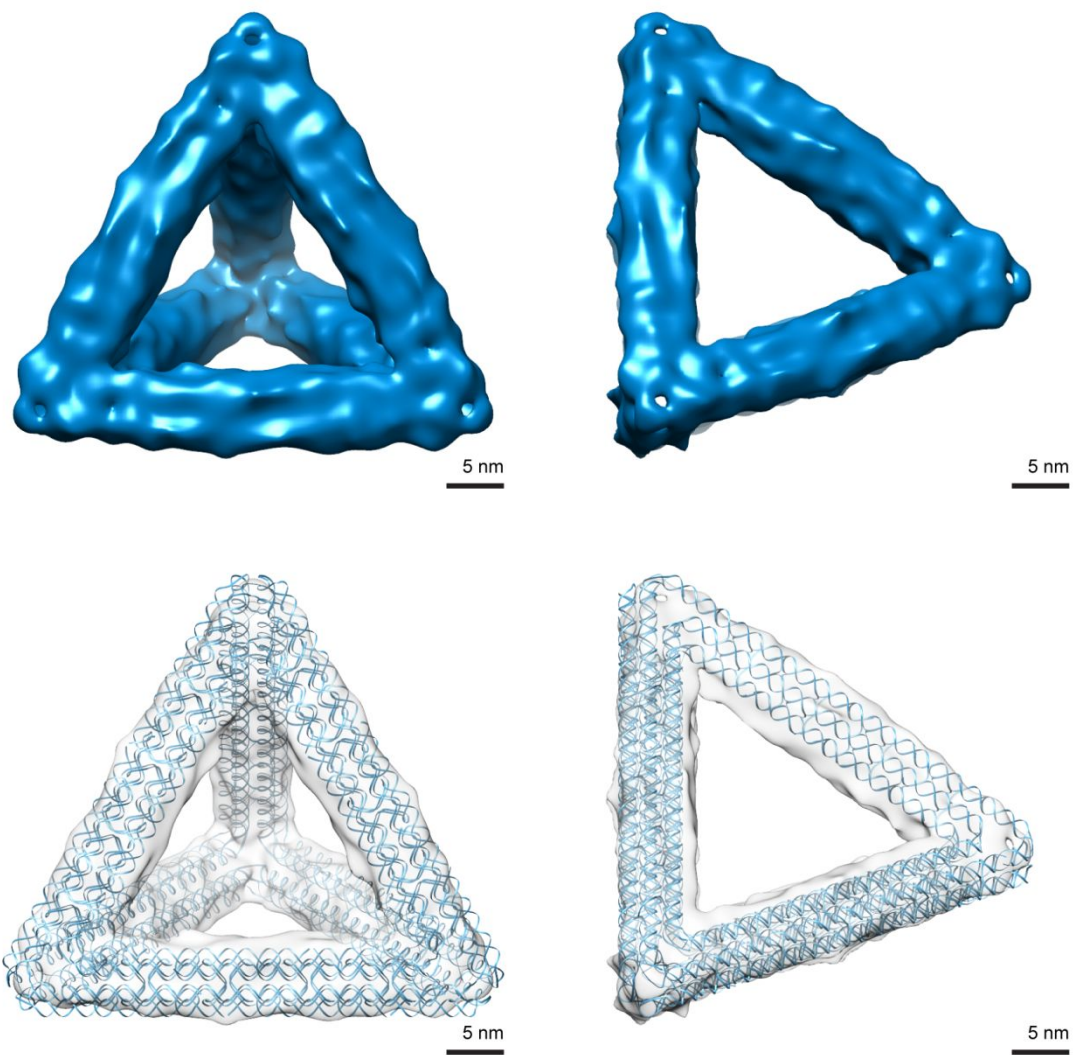

**Figure S69. 3D structure characterization of the 84-bp edge length DNA tetrahedron with the MV and middle connection layer using cryo-EM reconstruction and comparison with model predictions.**

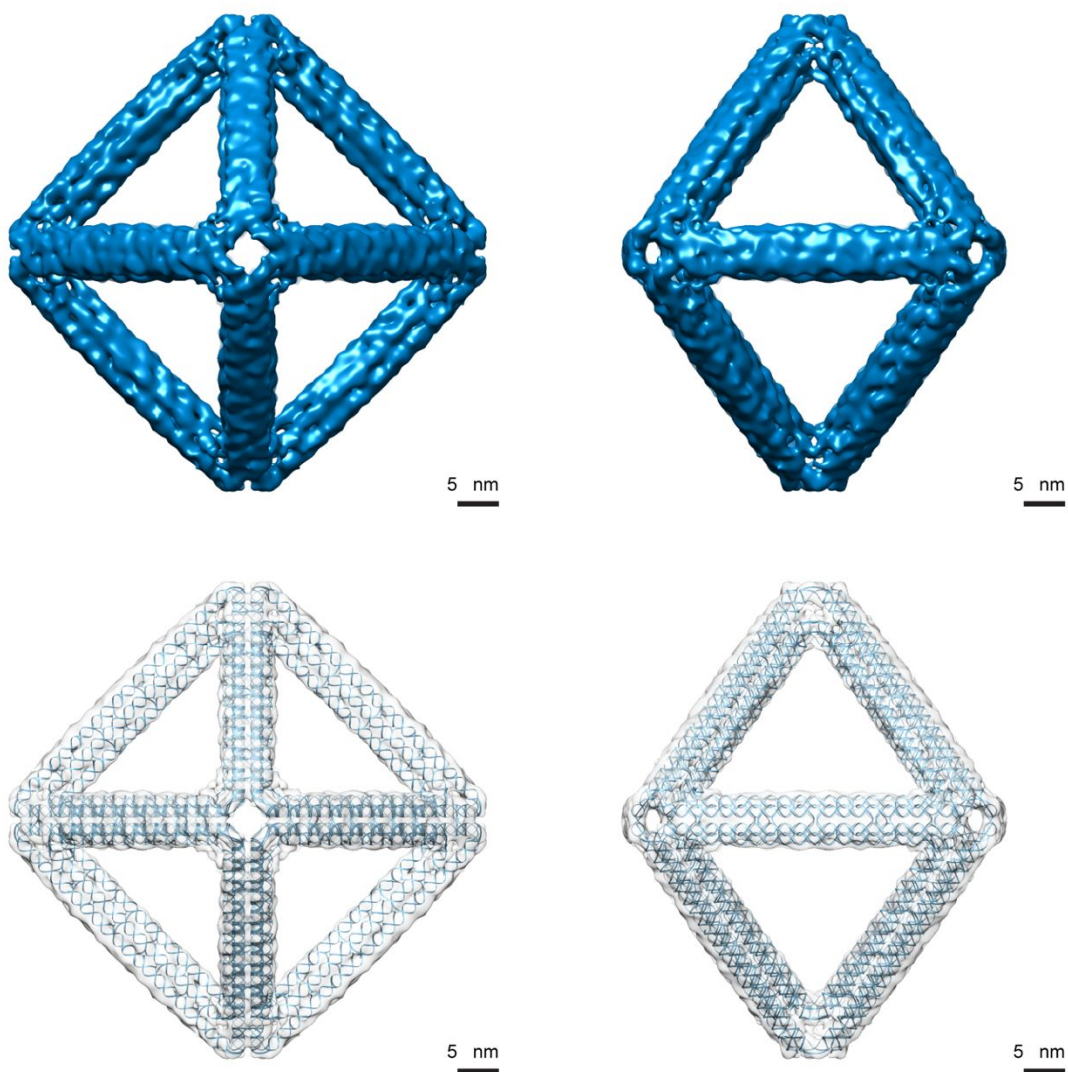

**Figure S70. 3D structure characterization of the MV octahedron of 84-bp edge length using cryo-EM reconstruction and comparison with model predictions. Movie is shown in Movie S6.**

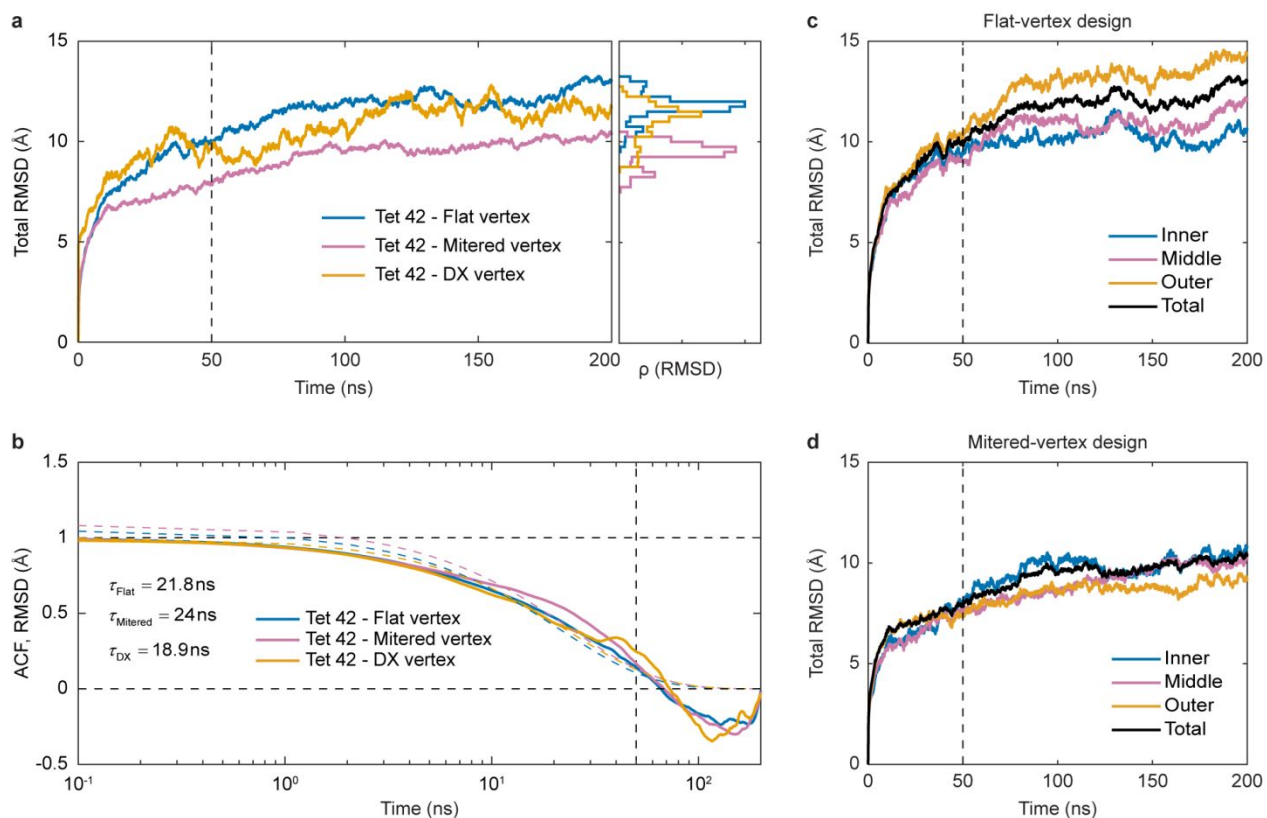

**Figure S71. Root-mean-square deviations (RMSD) of tetrahedra of 42-bp edge length from molecular dynamics simulations.** (a) Total RMSD of all nucleic acid atoms of a FV and MV 6HB tetrahedron compared to a DX tetrahedron compared to their respective atomic coordinates of the initial time point at 0 ns. (c-d) Differences in RMSD for the inner, middle, and outer DNA duplexes of the 6HB design for the FV (c) and MV (d). All molecular dynamics simulations were run for 200 ns.

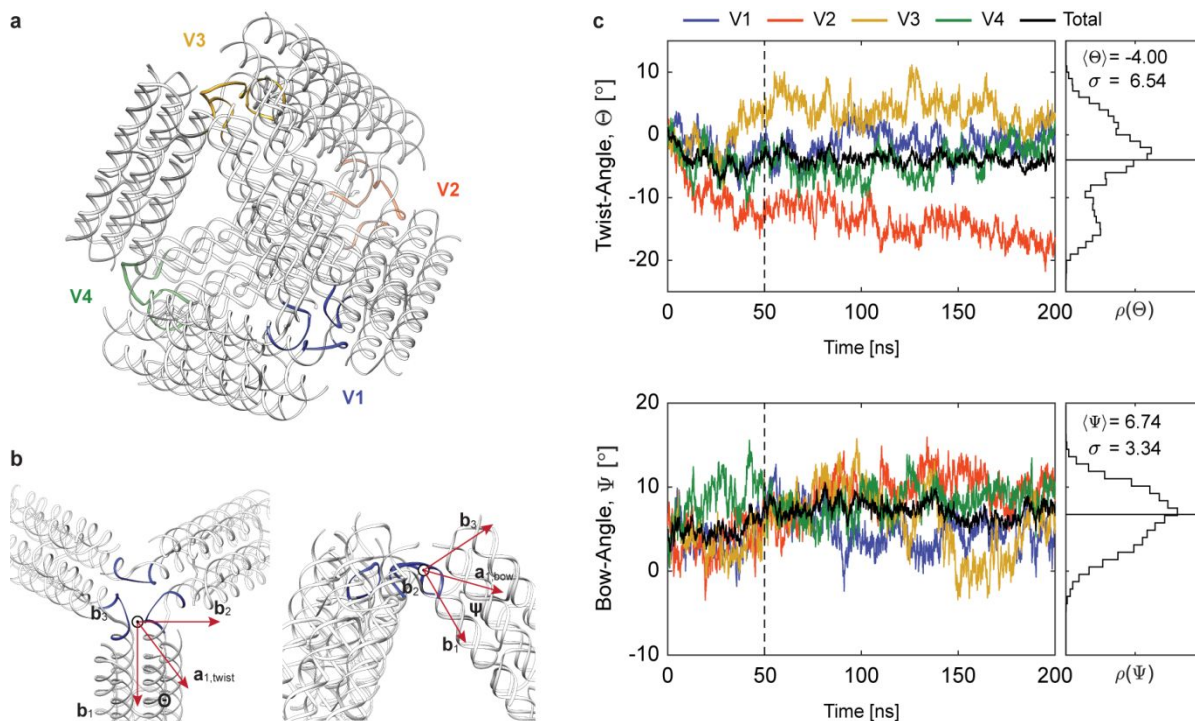

**Figure S72. Geometric analysis of a FV 6HB tetrahedron of 42-bp edge length.** (a) Location of each distinct vertex on the tetrahedron. (b) Definition of twist- ( $\Theta$ ) and bow- ( $\Psi$ ) angles at each vertex with respect to the orthonormal basis ( $\mathbf{b}_1$ ,  $\mathbf{b}_2$ ,  $\mathbf{b}_3$ ). (c) Twist-angles in degrees and bow-angles in degrees at each vertex (V1, V2, V3, V4) during a 200 ns MD simulation. The distribution of the twist- and bow-angles are shown separately in the right panel, along with the mean and standard deviation. Mean values are computed using data after the particles have equilibrated, which is distinguished by the vertical dashed line in the trajectory panel.

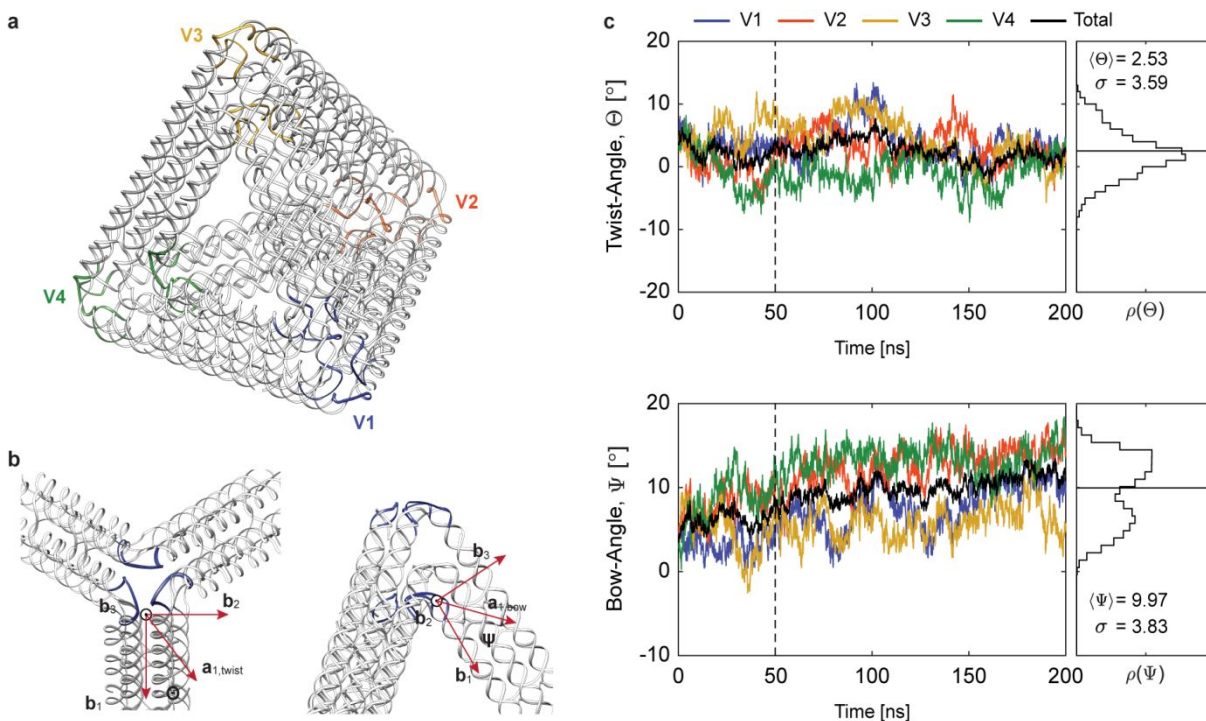

**Figure S73. Geometric analysis of the inner vertex of a MV 6HB tetrahedron of 42-bp edge lengths.** (a) Location of each distinct vertex on the tetrahedron. Both an inner vertex connection, and an outer vertex connection are defined. (b) Definition of twist- ( $\Theta$ ) and bow- ( $\Psi$ ) angles at each inner vertex with respect to the orthonormal basis ( $\mathbf{b}_1$ ,  $\mathbf{b}_2$ ,  $\mathbf{b}_3$ ). (c) Twist-angles in degrees and bow-angles in degrees at each inner vertex (V1, V2, V3, V4) during a 200 ns MD simulation. The distribution of the twist- and bow-angles are shown separately in the right panel, along with the mean and standard deviation. Mean values are computed using data after the particles have equilibrated, which is distinguished by the vertical dashed line in the trajectory panel.

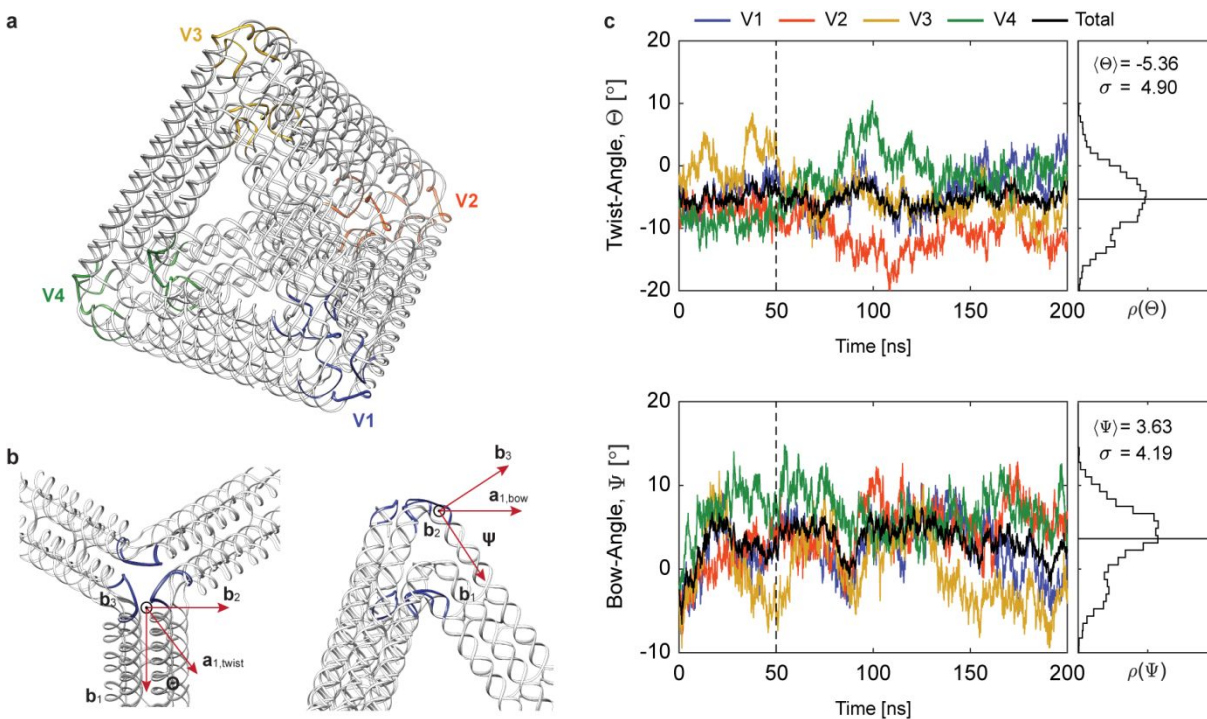

**Figure S74. Geometric analysis of the outer vertex of a MV 6HB tetrahedron of 42-bp edge lengths.** (a) Location of each distinct vertex on the tetrahedron. Both an inner vertex connection, and an outer vertex connection are defined. (b) Definition of twist- ( $\Theta$ ) and bow- ( $\Psi$ ) angles at each outer vertex with respect to the orthonormal basis ( $\mathbf{b}_1, \mathbf{b}_2, \mathbf{b}_3$ ). (c) Twist-angles in degrees and bow-angles in degrees at each outer vertex (V1, V2, V3, V4) during a 200 ns MD simulation. The distribution of the twist- and bow-angles are shown separately in the right panel, along with the mean and standard deviation. Mean values are computed using data after the particles have equilibrated, which is distinguished by the vertical dashed line in the trajectory panel.

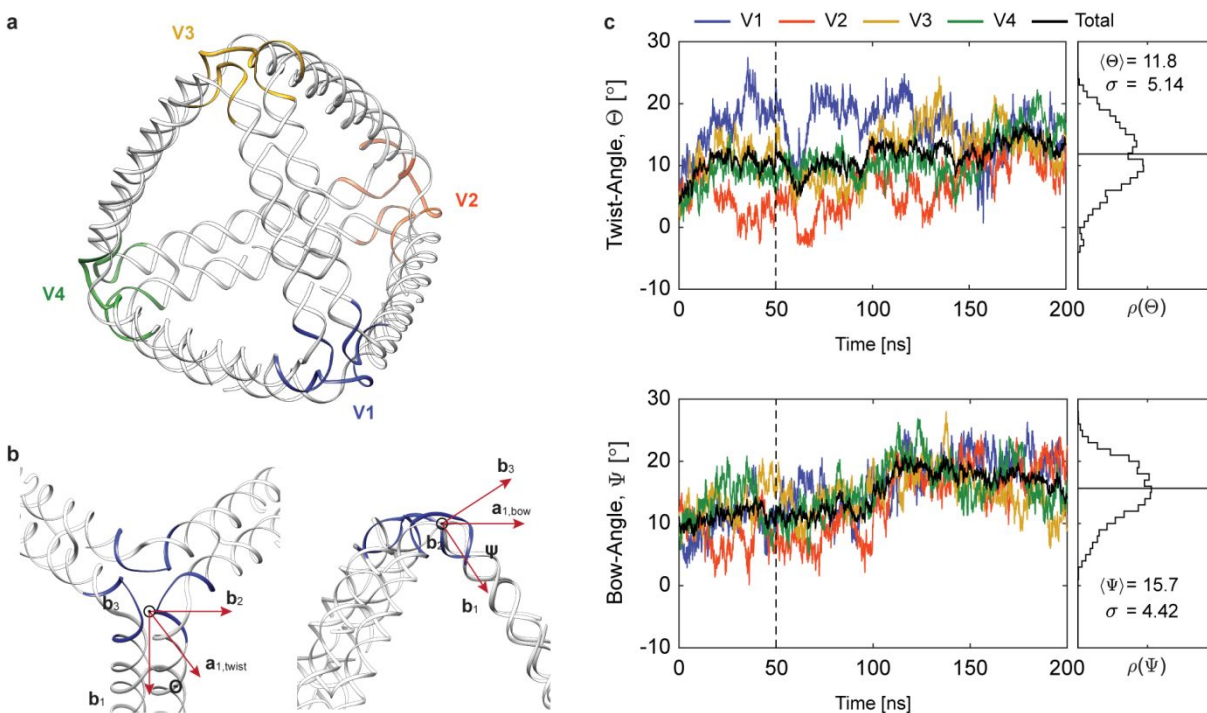

**Figure S75. Geometric analysis of a DX tetrahedron of 42-bp edge lengths.** (a) Location of each distinct vertex on the tetrahedron. (b) Definition of twist- ( $\Theta$ ) and bow- ( $\Psi$ ) angles at each vertex with respect to the orthonormal basis ( $\mathbf{b}_1$ ,  $\mathbf{b}_2$ ,  $\mathbf{b}_3$ ). (c) Twist-angles in degrees and bow-angles in degrees at each vertex (V1, V2, V3, V4) during a 200 ns MD simulation. The distribution of the twist- and bow-angles are shown separately in the right panel, along with the mean and standard deviation. Mean values are computed using data after the particles have equilibrated, which is distinguished by the vertical dashed line in the trajectory panel.

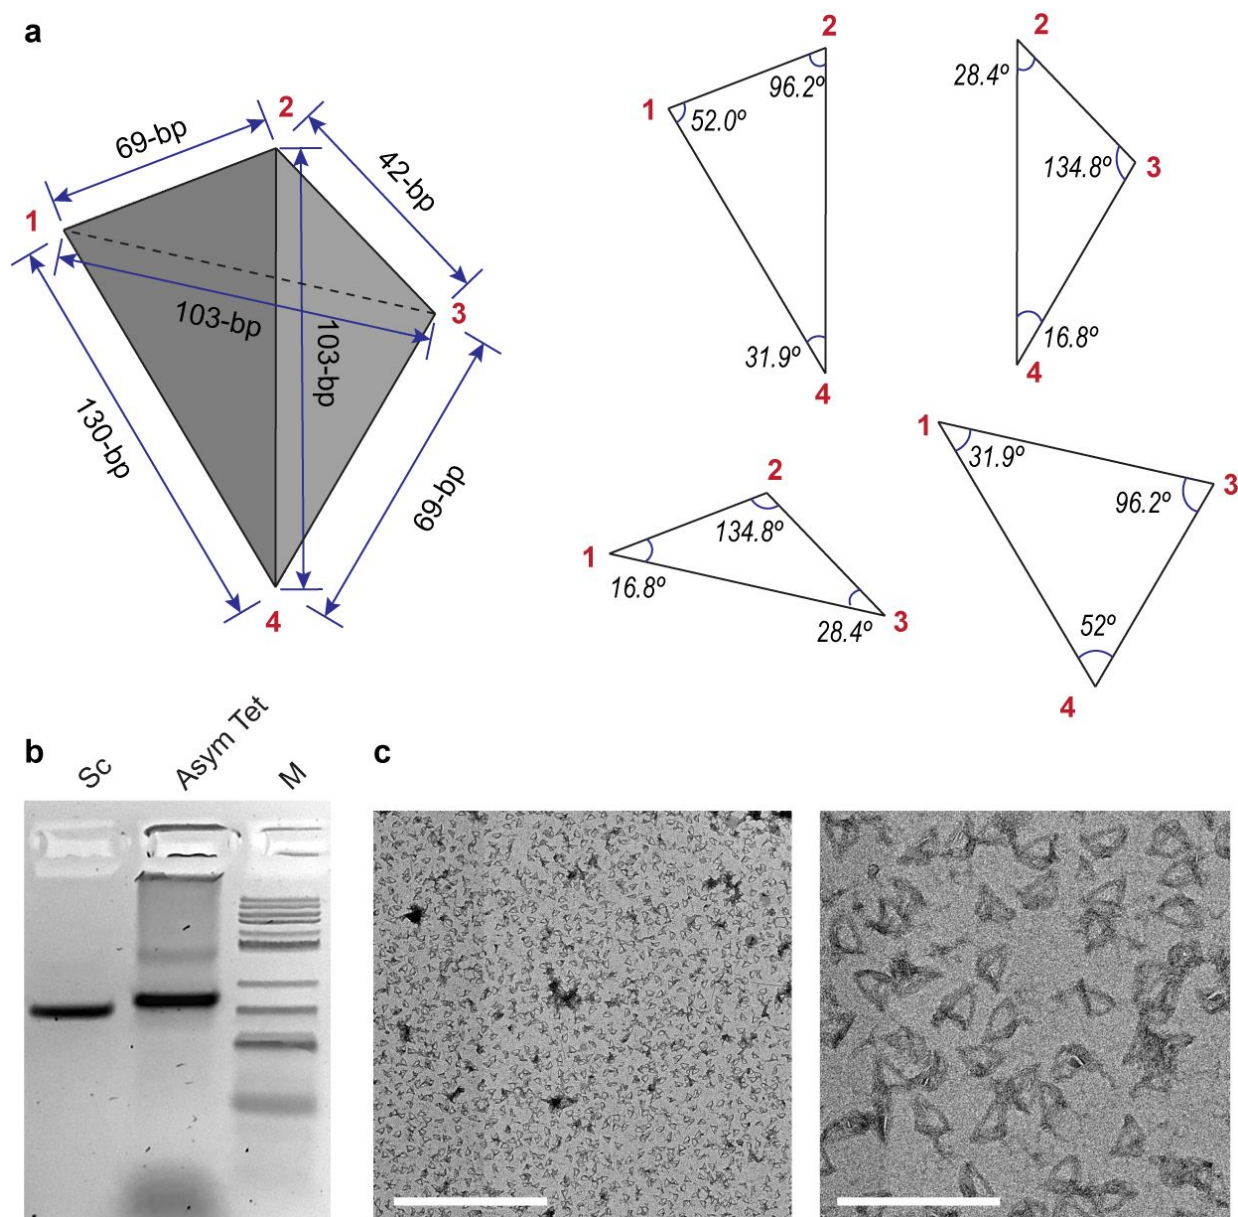

**Figure S76. Design and folding characterization of a fully asymmetric wireframe tetrahedron.** (a) Design of an asymmetric tetrahedron with incongruent triangular faces shown at right (b) Agarose gel electrophoresis shows a subtle shift in the folded band compared to scaffold. (c) Wide-field and near-field TEM shows mainly monodispersed and well-folded tetrahedra. Scale bar is 1  $\mu\text{m}$  for the wide-field image and 200 nm for the zoomed image.



**Table S1. The percentage of the staples with the 14-nt dsDNA seed dsDNA domain in total staples when applying the inner connection layer.** The values in parenthesis denote the fraction of basepairs that reside on strands with seeds. The patterns used are shown in Figure S4.

| Pattern            | Prior block (ID = 3) |                |                |                |                |                | Posterior block (ID = 13)    |                             |                             |                              |                             |                             |
|--------------------|----------------------|----------------|----------------|----------------|----------------|----------------|------------------------------|-----------------------------|-----------------------------|------------------------------|-----------------------------|-----------------------------|
|                    | Tetrahedron          |                |                | Octahedron     |                |                | Tetrahedron                  |                             |                             | Octahedron                   |                             |                             |
|                    | 42bp                 | 63bp           | 84bp           | 42bp           | 63bp           | 84bp           | 42bp                         | 63bp                        | 84bp                        | 42bp                         | 63bp                        | 84bp                        |
| <b>Pattern #1</b>  | 68.2<br>(39.9)       | 80.4<br>(40.9) | 81.1<br>(38.4) | 70.6<br>(39.9) | 83.5<br>(43.0) | 83.3<br>(38.4) | <b>91.7</b><br><b>(46.6)</b> | <b>100</b><br><b>(44.6)</b> | <b>100</b><br><b>(40.9)</b> | <b>90.3</b><br><b>(46.1)</b> | <b>100</b><br><b>(44.6)</b> | <b>100</b><br><b>(40.9)</b> |
| <b>Pattern #2</b>  | 54.0<br>(29.1)       | 62.9<br>(31.8) | 67.5<br>(33.4) | 59.4<br>(30.5) | 64.8<br>(33.0) | 69.2<br>(33.4) | 81.6<br>(49.6)               | 94.4<br>(48.9)              | 95.8<br>(39.7)              | 78.9<br>(48.5)               | 95.4<br>(49.0)              | 95.1<br>(39.6)              |
| <b>Pattern #3</b>  | 71.1<br>(50.6)       | 80.4<br>(43.2) | 73.0<br>(39.4) | 75.3<br>(53.3) | 83.5<br>(44.5) | 75.0<br>(39.4) | 76.9<br>(44.7)               | 80.0<br>(39.3)              | 79.2<br>(34.7)              | 77.9<br>(45.2)               | 80.0<br>(39.3)              | 78.5<br>(34.6)              |
| <b>Pattern #4</b>  | 54.0<br>(29.1)       | 62.9<br>(31.8) | 67.5<br>(33.4) | 58.3<br>(29.9) | 65.3<br>(33.8) | 69.2<br>(33.4) | 81.6<br>(49.6)               | 94.4<br>(48.9)              | 95.8<br>(39.7)              | 86.3<br>(50.2)               | 95.4<br>(49.0)              | 95.1<br>(39.6)              |
| <b>Pattern #5</b>  | 71.1<br>(50.6)       | 80.4<br>(43.2) | 73.0<br>(39.4) | 75.3<br>(53.3) | 83.5<br>(44.5) | 75.0<br>(39.4) | 76.9<br>(44.7)               | 80.0<br>(39.3)              | 79.2<br>(34.7)              | 77.9<br>(45.2)               | 80.0<br>(39.3)              | 78.5<br>(34.6)              |
| <b>Pattern #6</b>  | 61.4<br>(38.9)       | 69.6<br>(40.7) | 77.0<br>(38.9) | 63.1<br>(38.8) | 71.3<br>(40.6) | 78.5<br>(39.0) | 100<br>(52.6)                | 100<br>(46.4)               | 95.8<br>(40.1)              | 100<br>(53.0)                | 100<br>(46.7)               | 95.1<br>(39.9)              |
| <b>Pattern #7</b>  | 71.1<br>(50.6)       | 80.4<br>(43.2) | 73.0<br>(39.4) | 75.3<br>(53.3) | 83.5<br>(44.5) | 75.0<br>(39.4) | 76.9<br>(44.7)               | 80.0<br>(39.3)              | 79.2<br>(34.7)              | 77.9<br>(45.2)               | 80.0<br>(39.3)              | 78.5<br>(34.6)              |
| <b>Pattern #8</b>  | 51.1<br>(32.1)       | 61.0<br>(36.1) | 70.1<br>(36.4) | 53.9<br>(33.1) | 63.7<br>(36.8) | 72.5<br>(36.9) | 100<br>(55.3)                | 94.4<br>(48.2)              | 95.8<br>(39.7)              | 100<br>(55.3)                | 95.4<br>(48.2)              | 95.1<br>(39.6)              |
| <b>Pattern #9</b>  | 68.2<br>(39.9)       | 80.4<br>(41.0) | 81.1<br>(38.4) | 70.6<br>(39.9) | 83.5<br>(43.0) | 83.3<br>(38.4) | 91.7<br>(46.6)               | 100<br>(44.6)               | 100<br>(40.9)               | 90.3<br>(46.1)               | 100<br>(44.6)               | 100<br>(40.9)               |
| <b>Pattern #10</b> | 58.5<br>(43.2)       | 69.6<br>(41.2) | 73.0<br>(39.4) | 60.8<br>(42.4) | 71.3<br>(41.0) | 75.0<br>(39.3) | 84.6<br>(48.7)               | 89.5<br>(43.8)              | 87.5<br>(37.2)              | 85.7<br>(49.2)               | 90.3<br>(44.1)              | 88.2<br>(37.5)              |
| <b>Pattern #11</b> | 68.2<br>(39.9)       | 80.4<br>(40.9) | 81.1<br>(38.4) | 70.6<br>(39.9) | 83.5<br>(43.0) | 83.3<br>(38.4) | 91.7<br>(46.6)               | 100<br>(44.6)               | 100<br>(40.9)               | 90.3<br>(46.1)               | 100<br>(44.6)               | 100<br>(40.9)               |
| <b>Pattern #12</b> | 54.0<br>(29.1)       | 62.9<br>(31.8) | 67.5<br>(33.4) | 58.3<br>(29.9) | 65.3<br>(33.8) | 69.2<br>(33.4) | 81.6<br>(49.6)               | 94.4<br>(48.9)              | 95.8<br>(39.7)              | 82.7<br>(49.6)               | 95.4<br>(49.0)              | 95.1<br>(39.6)              |
| <b>Average</b>     | 71.0 (38.9)          |                |                |                |                |                | 90.2 (43.9)                  |                             |                             |                              |                             |                             |

**Table S2. The percentage of the staples with the 14-nt dsDNA seed dsDNA domain in total staples when applying the middle connection layer.** The values in parenthesis denote the fraction of basepairs that reside on strands with seeds. The patterns used are shown in Figure S4.

| Pattern            | Prior block (ID = 1) |                |                |                |                |                | Posterior block (ID = 11)    |                              |                              |                              |                              |                              |
|--------------------|----------------------|----------------|----------------|----------------|----------------|----------------|------------------------------|------------------------------|------------------------------|------------------------------|------------------------------|------------------------------|
|                    | Icosahedron          |                |                | Cuboctahedron  |                |                | Icosahedron                  |                              |                              | Cuboctahedron                |                              |                              |
|                    | 42bp                 | 63bp           | 84bp           | 42bp           | 63bp           | 84bp           | 42bp                         | 63bp                         | 84bp                         | 42bp                         | 63bp                         | 84bp                         |
| <b>Pattern #13</b> | 78.5<br>(43.3)       | 70.0<br>(36.6) | 79.2<br>(35.4) | 77.4<br>(43.7) | 70.0<br>(36.8) | 79.7<br>(35.9) | <b>94.2</b><br><b>(48.1)</b> | <b>85.4</b><br><b>(41.0)</b> | <b>79.2</b><br><b>(37.4)</b> | <b>92.9</b><br><b>(46.9)</b> | <b>84.6</b><br><b>(40.3)</b> | <b>78.5</b><br><b>(36.8)</b> |
| <b>Pattern #14</b> | 73.2<br>(42.2)       | 72.9<br>(40.4) | 69.2<br>(33.8) | 76.4<br>(44.5) | 77.8<br>(43.4) | 69.2<br>(34.1) | 66.7<br>(39.4)               | 83.7<br>(37.5)               | 86.8<br>(43.8)               | 66.7<br>(39.3)               | 82.8<br>(36.7)               | 86.1<br>(43.2)               |
| <b>Pattern #15</b> | 67.9<br>(36.3)       | 80.5<br>(38.1) | 76.1<br>(31.5) | 67.8<br>(35.7) | 84.8<br>(40.0) | 77.1<br>(31.7) | 72.8<br>(39.9)               | 87.1<br>(44.4)               | 85.2<br>(41.4)               | 74.1<br>(41.1)               | 85.8<br>(44.3)               | 86.0<br>(41.5)               |
| <b>Pattern #16</b> | 72.1<br>(39.2)       | 75.0<br>(39.8) | 70.7<br>(32.8) | 74.1<br>(41.3) | 79.6<br>(42.9) | 70.4<br>(33.3) | 68.1<br>(38.3)               | 86.4<br>(40.1)               | 89.4<br>(44.5)               | 67.8<br>(38.5)               | 84.8<br>(38.7)               | 88.0<br>(43.8)               |
| <b>Pattern #17</b> | 66.7<br>(35.6)       | 79.8<br>(37.3) | 78.1<br>(31.7) | 66.7<br>(35.0) | 82.8<br>(38.6) | 78.8<br>(31.9) | 75.4<br>(43.3)               | 84.8<br>(44.9)               | 85.2<br>(41.4)               | 76.4<br>(44.2)               | 83.8<br>(44.8)               | 86.0<br>(41.5)               |
| <b>Pattern #18</b> | 75.0<br>(48.5)       | 72.4<br>(40.0) | 74.1<br>(36.0) | 77.4<br>(49.8) | 74.0<br>(40.9) | 75.4<br>(36.4) | 84.3<br>(44.7)               | 80.0<br>(35.7)               | 69.7<br>(32.3)               | 84.5<br>(44.1)               | 80.0<br>(35.7)               | 70.5<br>(32.5)               |
| <b>Pattern #19</b> | 68.6<br>(36.7)       | 81.4<br>(38.8) | 75.0<br>(31.3) | 69.0<br>(36.4) | 87.5<br>(41.7) | 75.0<br>(31.5) | 71.4<br>(37.9)               | 88.4<br>(44.1)               | 85.2<br>(41.4)               | 71.4<br>(37.4)               | 88.3<br>(43.8)               | 86.0<br>(41.5)               |
| <b>Pattern #20</b> | 75.8<br>(48.1)       | 72.9<br>(41.1) | 69.2<br>(35.0) | 83.3<br>(51.8) | 77.8<br>(44.0) | 69.2<br>(35.2) | 77.2<br>(44.2)               | 79.2<br>(34.4)               | 71.9<br>(34.6)               | 75.7<br>(43.4)               | 79.0<br>(34.1)               | 73.3<br>(35.4)               |
| <b>Pattern #21</b> | 77.8<br>(40.6)       | 71.4<br>(36.1) | 79.2<br>(34.3) | 76.5<br>(40.2) | 71.8<br>(36.2) | 79.7<br>(34.5) | 94.1<br>(49.9)               | 85.1<br>(42.7)               | 82.4<br>(39.2)               | 92.6<br>(49.2)               | 84.2<br>(42.4)               | 82.5<br>(39.1)               |
| <b>Pattern #22</b> | 75.0<br>(47.9)       | 72.4<br>(40.6) | 70.5<br>(33.4) | 80.0<br>(50.7) | 75.7<br>(42.3) | 72.5<br>(35.8) | 79.2<br>(44.3)               | 79.5<br>(34.8)               | 71.3<br>(34.0)               | 80.7<br>(43.8)               | 79.6<br>(35.0)               | 71.7<br>(33.8)               |
| <b>Pattern #23</b> | 77.2<br>(38.2)       | 72.7<br>(35.7) | 79.2<br>(33.4) | 75.7<br>(37.3) | 73.4<br>(35.7) | 79.7<br>(33.4) | 93.9<br>(51.4)               | 84.8<br>(43.3)               | 85.2<br>(40.8)               | 92.4<br>(51.1)               | 83.8<br>(44.1)               | 86.0<br>(41.0)               |
| <b>Pattern #24</b> | 71.4<br>(37.9)       | 75.8<br>(39.6) | 71.2<br>(32.4) | 71.4<br>(37.4) | 82.0<br>(42.3) | 71.8<br>(32.4) | 68.6<br>(37.9)               | 87.5<br>(41.0)               | 90.4<br>(44.8)               | 69.0<br>(37.4)               | 87.5<br>(41.1)               | 90.4<br>(44.5)               |
| <b>Average</b>     | 75.0 (38.3)          |                |                |                |                |                | 81.6 (41.0)                  |                              |                              |                              |                              |                              |

**Table S3. Fraction of staples with 14-nt seed domains and basepairs that reside on strands with 14-nt seed domains when using the FV design. Ratio, A (%) = (# of staples with one or more 14-nt seed domains / total # of staples) and Ratio, B (%) = (# of nucleotides in 14-nt seed domains / total # of staple nucleotides)**

| Target structures           | Edge length | Staple-break       | # of staples with 14-nt seed domains | # of staples with 4-nt dsDNA domains | Ratio A | # of nucleotides in 14-nt seed domains | # of nucleotides in 4-nt dsDNA domains | Ratio B |
|-----------------------------|-------------|--------------------|--------------------------------------|--------------------------------------|---------|----------------------------------------|----------------------------------------|---------|
| <b>Tetra-hedron</b>         | 42          | <i>Max. length</i> | 33                                   | 0                                    | 91.7    | 744                                    | 0                                      | 46.6    |
|                             |             | <i>Max. seeds</i>  | 36                                   | 6                                    | 100     | 813                                    | 21                                     | 50.9    |
|                             | 63          | <i>Max. length</i> | 54                                   | 0                                    | 100     | 1050                                   | 0                                      | 44.6    |
|                             |             | <i>Max. seeds</i>  | 66                                   | 36                                   | 100     | 1218                                   | 168                                    | 51.8    |
|                             | 84          | <i>Max. length</i> | 72                                   | 0                                    | 100     | 1272                                   | 0                                      | 40.9    |
|                             |             | <i>Max. seeds</i>  | 102                                  | 75                                   | 100     | 1707                                   | 420                                    | 54.9    |
| <b>Octa-hedron</b>          | 84          | <i>Max. length</i> | 144                                  | 0                                    | 100     | 2544                                   | 0                                      | 40.9    |
|                             |             | <i>Max. seeds</i>  | 202                                  | 147                                  | 100     | 3381                                   | 812                                    | 54.4    |
| <b>Pentagonal bipyramid</b> | 42          | <i>Max. length</i> | 81                                   | 0                                    | 90.0    | 1833                                   | 0                                      | 45.8    |
|                             |             | <i>Max. seeds</i>  | 90                                   | 18                                   | 100     | 2040                                   | 63                                     | 51.0    |

**Table S4. Fraction of staples with 14-nt seed domains and basepairs that reside on strands with 14-nt seed domains when using the MV design.** Ratio, A (%) = (# of staples with one or more 14-nt seed domains / total # of staples) and Ratio, B (%) = (# of nucleotides in 14-nt seed domains / total # of staple nucleotides)

| Target structures   | Minimum edge length | Staple-break       | # of staples with 14-nt seed domains | # of staples with 4-nt dsDNA domains | Ratio A | # of nucleotides in 14-nt seed domains | # of nucleotides in 4-nt dsDNA domains | Ratio B |
|---------------------|---------------------|--------------------|--------------------------------------|--------------------------------------|---------|----------------------------------------|----------------------------------------|---------|
| <b>Tetra-hedron</b> | 42                  | <i>Max. length</i> | 31                                   | 1                                    | 64.5    | 603                                    | 4                                      | 28.2    |
|                     |                     | <i>Max. seeds</i>  | 45                                   | 36                                   | 77.6    | 693                                    | 158                                    | 32.4    |
|                     | 63                  | <i>Max. length</i> | 51                                   | 0                                    | 82.3    | 907                                    | 0                                      | 31.3    |
|                     |                     | <i>Max. seeds</i>  | 76                                   | 73                                   | 82.6    | 1174                                   | 378                                    | 40.5    |
|                     | 84                  | <i>Max. length</i> | 67                                   | 0                                    | 80.7    | 1143                                   | 0                                      | 31.3    |
|                     |                     | <i>Max. seeds</i>  | 104                                  | 101                                  | 85.2    | 1577                                   | 581                                    | 43.2    |
| <b>Octa-hedron</b>  | 84                  | <i>Max. length</i> | 111                                  | 6                                    | 68.5    | 1712                                   | 24                                     | 24.3    |
|                     |                     | <i>Max. seeds</i>  | 189                                  | 182                                  | 82.5    | 2829                                   | 1036                                   | 40.1    |

**Table S5. Required scaffold lengths for 40 rendered 6HB DNA-NPs of 42-bp edge length.**

The values in parenthesis denote required scaffold lengths for the MV DNA-NPs. 28 (FV) and 32 (MV) of the 40 structures, indicated with (\*), require a scaffold length longer than the 7,249-nt M13mp18. These each used a random sequence of the appropriate length to demonstrate the theoretical scaffold and staple routing.

| Category                                                                           | Required scaffold length (nt)                              |                                                   |                                                              |                                                               |                                                       |
|------------------------------------------------------------------------------------|------------------------------------------------------------|---------------------------------------------------|--------------------------------------------------------------|---------------------------------------------------------------|-------------------------------------------------------|
| <b>Platonic</b>                                                                    | Tetrahedron<br>1,512 (2,218)                               | Cube<br>3,024 (3,704)                             | Octahedron<br>3,024 (3,738)                                  | Dodecahedron<br>7,560* (8,590*)                               | Icosahedron<br>7,560* (9,708*)                        |
| <b>Archi-<br/>medean</b>                                                           | Cuboctahedron<br>6,048 (8,736*)                            | Icosidodecahedron<br>15,120* (22,140*)            | Rhombi-<br>cuboctahedron<br>12,096* (18,282*)                | Snub cube<br>15,120* (20,340*)                                | Truncated cube<br>9,072* (14,700*)                    |
|                                                                                    | Truncated<br>Cuboctahedron<br>18,144* (23,760*)            | Truncated<br>dodecahedron<br>22,680*<br>(36,900*) | Truncated<br>icosahedron<br>22,680*(27,000*)                 | Truncated<br>octahedron<br>9,072* (11,676*)                   | Truncated<br>Tetrahedron<br>4,536 (6,732)             |
| <b>Johnson</b>                                                                     | Gyroelongated<br>pentagonal<br>pyramid<br>6,680* (8,334*)  | Triangular<br>pyramid<br>2,292 (3,075)            | Pentagonal<br>bipyramid<br>3,780 (4,794)                     | Gyroelongated<br>square<br>bipyramid<br>6,096 (7,897*)        | Square<br>gyrobicupola<br>8,192* (11,992*)            |
|                                                                                    | Pentagonal<br>orthocupola-<br>rotunda<br>12,830* (18,710*) | Pentagonal<br>orthobirotunda<br>15,120* (22,100*) | Elongated<br>pentagonal<br>gyrobicupola<br>15,300* (22,935*) | Elongated<br>pentagonal<br>gyrobirotunda<br>20,340* (30,110*) | Gyroelongated<br>square bicupola<br>14,720* (19,658*) |
| <b>Catalan</b>                                                                     | Rhombic<br>dodecahedron<br>6,048 (7,232)                   | Rhombic<br>triacontahedron<br>15,120* (18,240*)   | Deltoidal<br>icositetrahedron<br>13,824* (16,018*)           | Pentagonal<br>icositetrahedron<br>16,992* (19,724*)           | Triakis<br>octahedron<br>11,088* (14,227*)            |
|                                                                                    | Disdyakis<br>dodecahedron<br>23,040* (29,086*)             | Triakis<br>Icosahedron<br>28,260* (36,215*)       | Pentakis<br>dodecahedron<br>22,980* (29,988*)                | Tetrakis<br>hexahedron<br>9,912* (12,664*)                    | Triakis<br>tetrahedron<br>5,364 (7,063)               |
| <b>Miscel-<br/>laneous</b>                                                         | Twisted<br>Triangular<br>prism<br>3,024 (4,359)            | Heptagonal<br>bipyramid<br>10,668* (12,786*)      | Enneagonal<br>Trapezohedron<br>40,716* (43,897*)             | Small stellated<br>dodecahedron<br>34,560* (46,302*)          | Rhombic<br>hexe-contahedron<br>30,720* (42,270*)      |
| * indicates designs that require scaffold length greater than the 7,249-nt M13mp18 |                                                            |                                                   |                                                              |                                                               |                                                       |

**Table S6. Design parameters of the automatic sequence design for the FV DNA-NPs.**

|                                                                                    | Tetrahedron |       |       | Octahedron | Pentagonal bipyramid |
|------------------------------------------------------------------------------------|-------------|-------|-------|------------|----------------------|
|                                                                                    | 42bp        | 63bp  | 84bp  | 84bp       | 42bp                 |
| <b>Geometry</b>                                                                    |             |       |       |            |                      |
| # of faces, $N_f$                                                                  | 4           | 4     | 4     | 8          | 10                   |
| # of vertices                                                                      | 4           | 4     | 4     | 6          | 7                    |
| # of edges, $N_e$                                                                  | 6           | 6     | 6     | 12         | 15                   |
| # of arms at the junction                                                          | 3           | 3     | 3     | 4          | 4,5                  |
| Maximum edge length (bp)                                                           | 42          | 63    | 84    | 84         | 42                   |
| Minimum edge length (bp)                                                           | 42          | 63    | 84    | 84         | 42                   |
| <b>The minimum spanning tree of the dual graph of the loop-crossover structure</b> |             |       |       |            |                      |
| # of nodes, $N_f + 2N_e$                                                           | 16          | 16    | 16    | 32         | 40                   |
| # of edges, $4N_e$                                                                 | 24          | 24    | 24    | 48         | 60                   |
| # of members of the spanning tree                                                  | 15          | 15    | 15    | 31         | 39                   |
| <b>Scaffold</b>                                                                    |             |       |       |            |                      |
| # of unpaired nucleotides, $N_{un}$                                                | 0           | 0     | 0     | 0          | 0                    |
| Required length (bp)                                                               |             |       |       |            |                      |
| $= 6 \times \left[ \sum_{i=1}^{N_e} i \text{th edge length (bp)} \right] + N_{un}$ | 1,512       | 2,268 | 3,024 | 6,048      | 3,780                |
| # of double crossovers                                                             | 15          | 15    | 15    | 31         | 39                   |
| <b>Staples</b>                                                                     |             |       |       |            |                      |
| # of staples                                                                       | 36          | 54    | 72    | 144        | 90                   |
| # of nucleotides in staples                                                        | 1,596       | 2,352 | 3,108 | 6,216      | 4,000                |
| Minimum length (bp)                                                                | 30          | 30    | 30    | 30         | 30                   |
| Maximum length (bp)                                                                | 54          | 54    | 54    | 54         | 54                   |
| Average staple length (bp)                                                         | 44.33       | 43.56 | 43.17 | 43.17      | 44.44                |
| # of double crossovers                                                             | 33          | 69    | 105   | 209        | 81                   |
| # of unpaired nucleotides                                                          | 84          | 84    | 84    | 168        | 220                  |

**Table S7. Design parameters of the automatic sequence design for the MV DNA-NPs.**

|                                                                                    | Tetrahedron |       |       | Octahedron |
|------------------------------------------------------------------------------------|-------------|-------|-------|------------|
|                                                                                    | 42bp        | 63bp  | 84bp  | 84bp       |
| <b>Geometry</b>                                                                    |             |       |       |            |
| # of faces, $N_f$                                                                  | 4           | 4     | 4     | 8          |
| # of vertices, $N_v$                                                               | 4           | 4     | 4     | 6          |
| # of edges, $N_e$                                                                  | 6           | 6     | 6     | 12         |
| # of arms at the junction                                                          | 3           | 3     | 3     | 4          |
| Maximum edge length (bp)                                                           | 42          | 63    | 84    | 84         |
| Minimum edge length (bp)                                                           | 74          | 95    | 116   | 106        |
| <b>The minimum spanning tree of the dual graph of the loop-crossover structure</b> |             |       |       |            |
| # of nodes, $4N_f$                                                                 | 12          | 12    | 12    | 24         |
| # of edges, $4N_e - N_f$                                                           | 20          | 20    | 20    | 40         |
| # of members of the spanning tree                                                  | 11          | 11    | 11    | 23         |
| <b>Scaffold</b>                                                                    |             |       |       |            |
| # of unpaired nucleotides                                                          | 102         | 102   | 102   | 138        |
| Required length (bp)                                                               | 2,118       | 2,874 | 3,630 | 6,762      |
| # of double crossovers                                                             | 11          | 11    | 11    | 23         |
| <b>Staples</b>                                                                     |             |       |       |            |
| # of staples                                                                       | 48          | 62    | 83    | 162        |
| # of nucleotides in staples                                                        | 2,142       | 2,898 | 3,654 | 7,056      |
| Minimum length (bp)                                                                | 23          | 29    | 25    | 21         |
| Maximum length (bp)                                                                | 59          | 61    | 60    | 60         |
| Average staple length (bp)                                                         | 44.63       | 46.74 | 44.02 | 43.56      |
| # of double crossovers                                                             | 61          | 97    | 133   | 253        |
| # of unpaired nucleotides                                                          | 126         | 126   | 126   | 432        |

**Table S8. Staple sequences for the FV tetrahedron of 42-bp edge length.** The sequence is represented by colors; unpaired nucleotides with blue, and crossovers with orange, the 14-nt seed dsDNA domain with green, and the 4-nt dsDNA domain with red.

| Staple ID | Length (bp) | Staple sequences                                       |
|-----------|-------------|--------------------------------------------------------|
| 1         | 54          | AACAAAATTAATTACATTTAACAAAGGAAGATGATGAAACACGTTATTGAATAA |
| 2         | 54          | AGAACTCAAACATATCGGCCTTGCTCAGTAATAACATCACTGCCCCGAAATAC  |
| 3         | 54          | AAGAATACGTGGCACAGACAATATACATAGAACCCTTCTGTTACAATAAAAA   |
| 4         | 52          | ACAAAATCGCGCAGTTTCATTTGAAATATATGTGGCTTTGAATACCAAGTT    |
| 5         | 52          | GTCTGTCCATCACGGTAATATCCAAGAACGCTCAGGCCACCGAGTAAAAGA    |
| 6         | 52          | TACCAGTCACACGTTTTTGAATGGCTAACATCGCTATTTACATTGGCAGAT    |
| 7         | 52          | TACGGTCCACGCTTTCCTCGTTAGAAAGGGATTTAGGGCGCTGGCAAGTG     |
| 8         | 52          | CCAGCAGCAAATGAGAATTGAGGAACTAATAGATCAGTGCCACGCTGAGAG    |
| 9         | 52          | GATGATGGCAATTCACAGAAATAAATGAATATACATATTCCTGATTATCA     |
| 10        | 52          | CATATCAAATTTTGCACGTAATTTGAATAATGGAAGCGAGTACCTTTT       |
| 11        | 52          | AGTTGGCAAATCAACAGTTGAAAGAATCAAACCCTCAATGGTCAATAGAT     |
| 12        | 52          | TTTGACGAGCACGTATAACGTGCTCGCGCTACAGGGCGCGACGAACGGTACG   |
| 13        | 51          | GCCATTGCATTGACGCTTTTTTTCAATCGTCTGAAATGGATCAACAATTC     |
| 14        | 50          | AACAGTACATCTGTAATTTTTTTTCGTGCAAAGGGATGCCTGAGTAGA       |
| 15        | 50          | GCCGCGCTTGAGAAGTTTTTTTGTTTTTTATAATCAGTGATGATTTTAGA     |
| 16        | 50          | GTTTGATGAAACAATTTTTTTTAACGGATTGCGCTGATTAGTAATTTT       |
| 17        | 50          | CGAACTGATCGAACCACTTTTTTTCAGCAGAAGATAAATACTATGGTTGC     |
| 18        | 49          | ATTCTGGCCCGTATTAATTTTTAATCCTTTGCCGAAACATCAAGAA         |
| 19        | 49          | TTGCTGAAAGGAGTTTTTTTTTAGAAGTATTAGACAACCTGAAAGCGT       |
| 20        | 49          | AATTACCTGTGAGTAAATTTTTTTCATTATCATTTTGCCAAATCTGGTC      |
| 21        | 49          | AATACTTCGGGGAAATTTTTTTCGCGGCAACGTGGTTAGAACCTAC         |
| 22        | 47          | GCGGGCGCTAGACAGAGAGGTGAGCCGATTAAATCAGAGCGGGAGCTA       |
| 23        | 47          | GCCTGCAATAGAGCCAACAAAGAACAACAAGTTATCTAAAATATCT         |
| 24        | 47          | ATTATCATCAGTAACAGAAAGGAACGTCAGGAAATTGCGTAGATTT         |
| 25        | 34          | AACAGGAGGGCGGTACGTTTTTTTATTAACACC                      |
| 26        | 34          | TCAGGTTTAGGGAAGAAATTTTTTTAGCGAAAGGA                    |
| 27        | 34          | TTAGGAGCAACCACCAGTTTTTTAAGGAGCGGA                      |
| 28        | 32          | CCAGAATCCAATGCGCGTAACCACCACACC                         |
| 29        | 32          | AATACATTTCTCAAAATATCTAAAGCATCACC                       |
| 30        | 32          | ACATCGGGAACTACTTCCAATATAATCCTGATT                      |
| 31        | 30          | AAAAGTTAGCAAAAGCGAATTATTCATTTT                         |
| 32        | 30          | GCTTGAATTGATTAAATTAACCGTTGTAGC                         |
| 33        | 30          | GACAACAAACAGAAGCAGTAATAAAAGGGAC                        |
| 34        | 30          | CCTTGTAAATCATACCTTTTTTAATGGA                           |
| 35        | 30          | CTACATTACAGGAACAATATTACCGCCA                           |
| 36        | 30          | TACCGAAGCCCTAATTAGTCTTTAATGCG                          |



**Table S9. Staple sequences for the FV tetrahedron of 63-bp edge length.** The sequence is represented by colors; unpaired nucleotides with blue, and crossovers with orange, the 14-nt seed dsDNA domain with green, and the 4-nt dsDNA domain with red.

| Staple ID | Length (bp) | Staple sequences                                       |
|-----------|-------------|--------------------------------------------------------|
| 1         | 54          | ATCGGAACGAGGGTAGCAAAAACGGGCCTAAAACGAAAGAACCCCCACGTTAAT |
| 2         | 54          | TTCATTCCATATAACAGTTGCAAATGGGGCGGAGCTGAAATTAACATAGGAAT  |
| 3         | 54          | CTGTATGGGATTTTGCTAAATTGCGAAAAAGGCTCCAAAGCTTTTCGTCTCAT  |
| 4         | 52          | GTCATTTTTGCGGATTTAGTTTGACCCATCAATTCGCTCCTTTTGATAAGAG   |
| 5         | 52          | AACTACAACGCCGAGAGAATAGAAA GTTAAATTGTGTTTCGTCAACAGTACA  |
| 6         | 52          | TCGCCACGCATAAGACTTTTTTCATGGAAATACACTGACAATGACAACAACCA  |
| 7         | 52          | GTCAGTGCCTTGAGTACCAGGCGGATCCACCCTCATAATAAGTTTAAACGGG   |
| 8         | 52          | CTTAGCCGGAACGAATTCATTACCCATGGGCTTGACGACCTGCTCCATGTTA   |
| 9         | 52          | AAATAGCGAGAGGCCGAGAATGACCAGAGCCCGAGACGACGATAAAAACCA    |
| 10        | 51          | AATAGGTGTCGCCTGATTTTTTTAAATTGTGTGCGAAATCCGGACTGGCTC    |
| 11        | 51          | CTTGCCCTGAACACTATTTTTTTCATAACCCTCGTTTACCAAACAACTC      |
| 12        | 51          | GTTGAAAAAACAAGCTTTTTTTTGATACCGATAGTTGCGCCAAGAACAAC     |
| 13        | 51          | TCAGAAGCACTTTTGATTTTTTTGATACAGGAGTGTACTGGGAATAGCAA     |
| 14        | 50          | ACTACGAAGCGCGAAACTTTTTTAAAGTACAACGGAGTATTAAGAGGCT      |
| 15        | 50          | GCTATATTTCAGGCAAGTTTTTTGCAAAGACACAAACTAAATGAATTTT      |
| 16        | 50          | CAGTTAATGAGGAACCTTTTTTTCATGTACCGTAACACTGAATAAAGCGC     |
| 17        | 50          | GCCAGAGGGTCAGGATTTTTTTTAGAGAGTACCTTTAATTAATGTCAGA      |
| 18        | 49          | GAGCTTGCCAGGTAGTTTTTTAAAGATTCATCAGTGTGTCTGGAAGT        |
| 19        | 49          | CCTCATAGTGAATTTATTTTTTCCGTTCCAGTAAGCGGAATCGTCATA       |
| 20        | 49          | TAAGGGAAACAGTCAGTTTTTTGACGTTGGGAAGAAGCGAAAGACAGC       |
| 21        | 49          | CTGAATATACGCCAAATTTTTTTAGGAATTACGAGGCGACCAGGCGCAT      |
| 22        | 46          | GAGACTCCTCAAGAGAAGGGGGTTGATACTCAGGAGGTTAACCGC          |
| 23        | 46          | AATATTCATTGAATCCCCCGGTCTTTTGCATCAAAAAGACGTTTT          |
| 24        | 46          | AGGCTGGCTGACCTTCATCAGCTGCTACACCAGAACGAGCTTTTAA         |
| 25        | 45          | CACCCTCATTTATTATTTTAGCGGGGTTTTGCTCAGTACCTATTT          |
| 26        | 45          | TTATGCGATTAGGACAGATCTTGACAAGAACCGGATGGACCAACT          |
| 27        | 45          | GCGAACCAGACTGGATACTTTAAACAGTTCAGAAAATGTTAAAT           |
| 28        | 42          | ACCACATTAATAATAATTCTGCGAACGAGTAGATGAGCTCAA             |
| 29        | 42          | TTGAAA GTTAAGAATGGTTTAATTTCAAAGTAAATAATCAAC            |
| 30        | 42          | TAAAGCCTGTCGTCTCAACAGTTTCAGCGGAGTTAACGATCT             |
| 31        | 42          | AAAACGAGCGGGA TAGAGGCTTTGAGGACTAAACCTAAAGGC            |
| 32        | 42          | CGGAACCTTCAGGACCGCCACCCTCAGAGTACCGAAGTGCC              |
| 33        | 42          | TTCCATTCGGCTACCGTCACCCTCAGCAAATCTAGCGATTA              |
| 34        | 42          | GTTTAGACCGGAA GGA CTTC AAATATCGTTAAGAGTAAATCA          |
| 35        | 42          | CATGTTTCAACTACTAATAGTAGTAGCAAGGTGGATTAGAT              |
| 36        | 42          | ACATTTCGATTCCCGCAACTAAAGTACGTGAGATTTCCAATA             |
| 37        | 42          | AAAGTTAGAAATGCGGGTTATCAGCTTAGGAGCCGAACAAC              |
| 38        | 42          | TAAAGGAACA ACTTTTCCAGACGTTAGAATAAAAGGTGAA              |
| 39        | 42          | CGCTTTACTAACGAACA CTCTTTGGGCAAAAAGGAAGT                |
| 40        | 39          | GTCGAGAATTAGGACTGAAACATGAAAGATCAGAGCCAC                |
| 41        | 39          | GTAACA AAAGAGTAA TGAAACGGTGTACAAATTGAATTACC            |
| 42        | 39          | AAAATCA TCAAATGGCGTCCAATACTGCGTAGCTTCAAA               |
| 43        | 38          | TCATTGAGTAAGAGCACGAGAACATTTCAGTGAATAAGG                |

|    |    |                                        |
|----|----|----------------------------------------|
| 44 | 38 | AATTCGCATACATGGAAGCGGAACCCTGACTATTATAG |
| 45 | 38 | CACCCTTTGTATCATATCACCGTATAAGTATAGCCCGG |
| 46 | 30 | TACATAAATGCTGTGCTTAGAGCTTAATTG         |
| 47 | 30 | AGTCTCTTAGCGTAGCATTCCACAGACAGC         |
| 48 | 30 | ATTATTAAAGGGAGTGATATATTCGGTCGCT        |
| 49 | 30 | GCCCAATCCCCTGACAGTGCCCGTATAAA          |
| 50 | 30 | ATTATACCGAACTGCGCAGACGGTCAATCA         |
| 51 | 30 | CAACAGGGTAATATGCAAAAGAAGTTTT           |
| 52 | 30 | AATCATATCATTGGTCAATAACCTGTTTA          |
| 53 | 30 | TTTCTTACTCCAAATAATAATTTTTTAC           |
| 54 | 30 | TACCAAGGCACCAATAAAATACGTAATGCC         |

---

**Table S10. Staple sequences for the FV tetrahedron of 84-bp edge length.** The sequence is represented by colors; unpaired nucleotides with blue, and crossovers with orange, the 14-nt seed dsDNA domain with green, and the 4-nt dsDNA domain with red.

| Staple ID | Length (bp) | Staple sequences                                      |
|-----------|-------------|-------------------------------------------------------|
| 1         | 54          | GAGTACCTTTAATTGCTCGGTGCTAATTCTGCGAACGAGCGAGCTGGCTGAC  |
| 2         | 54          | CACCACCAGAGCCGCCGCCCTGAATTGATGATACAGGAGTTATTTCCCAATAA |
| 3         | 54          | CCTCAGAACCGCCACCCTCCAACTATAGTTAGCGTAACGCAGTTTCCGCAGAC |
| 4         | 52          | AAGCGGATTGCATCAATATAATGCTGTCGCAAATTATTATAGTCAGAAGCA   |
| 5         | 52          | CTTTTCATAATCAACACAAACAAATAGTGCCTTGATTATTAGCGTTTGCCAT  |
| 6         | 52          | ATTAGGATTAGCGGGCCCAATAGGAATTAGTAAATGACTCCTCAAGAGAAGG  |
| 7         | 52          | AAAAGAACTGGCATACCGATTGAGGGAAGGCCGGAATAATAACGGAATACCC  |
| 8         | 52          | TATCAGCTTGCTTTAGCAACGGCTACAACACTCATCTTTAATTGTATCGGTT  |
| 9         | 52          | CTTTAATCATTGTAAAAGGAATTACTTAGACTGGAGATGGTTTAATTTCAA   |
| 10        | 52          | ATTTTGTCACAATCAATAGAGGTGAATTAGAGCCAGCAATCTTTTTTCACG   |
| 11        | 52          | AGGTAGAAAAGATTCAATGTTACCATTGCAAAAAGAAGTTTGCAGATAGCC   |
| 12        | 52          | GGAGTTAAAGGCCGCTTTTAGTTTTCAAGGCACCAACCTAGTCTTGCCCTGA  |
| 13        | 51          | AAAATAGCTACCAGAAATTTTTTTGGAAAACGAGGAAACGCAATGTAGCG    |
| 14        | 51          | ACGTAATGCCAGAACGTTTTTTTAGTAGTAAATTGGGCTTGATAGAATGA    |
| 15        | 51          | GTCATACATGAACATGTTTTTTAAAGTATTAAGAGGCTGAGAAAAGAGG     |
| 16        | 51          | CTTGAGCCATCCAAAAATTTTTTTAAAGGCTCAAAAGGAGCCTCGAAATC    |
| 17        | 50          | ATAACAGTTAATTCTACTTTTTTTAATAGTAGTAGCACGCCACCAGAAC     |
| 18        | 50          | CGCAGTATGATCGGCATTTTTTTTTTTCGGTCATAGCCCCGTTGAAATA     |
| 19        | 50          | CCACAGACAAGAAAGGATTTTTTTACAACAAAGGAATCGGAATAAGTTT     |
| 20        | 50          | TAATAAGTAGCGCAAAAAGAAATATGGTTTACCAGTTGACGGAGTAGCA     |
| 21        | 50          | ATAAGGACAACGGAGATAACCGGTCACCCTCAGCACATAAGAAGAGGCA     |
| 22        | 50          | TAAGAACTGTCAAAAAATTTTTTTTCAGGCTTTACCCTGACGGTCATTAC    |
| 23        | 50          | AAGTAAGAATCCCCCTAATAAATTAGGAATACCACAGCAACAAGAGGGG     |
| 24        | 49          | GCGGATAAGAACGGTGTTTTTTTACAGACCAGGCGGTCAGGATTAGA       |
| 25        | 49          | CAGCTTGATTGCTCCATTTTTTTTGTACTTAGCCGGTAGTACCGCCAC      |
| 26        | 49          | CCCGAAAGAACGTAATTTTTTTCAAAGCTGCTCATTTGAGGCTTGCAG      |
| 27        | 49          | CACCACCGCTATCTTTTTTTACCGAAGCCCTTTTCAACATTATTAC        |
| 28        | 45          | TTTTAAACAACAGTGCAAAGAAGAGCAACACCCTCGACGATTGGC         |
| 29        | 45          | CGTCTTTATTTTTCGAACCGAACTGACCAAGTATATCATTTCAG          |
| 30        | 45          | ACCATTAAAGCTATAATCTTGACAAGAACTCGAGCTGCTTAGAGCT        |
| 31        | 44          | AAAGAAATTTATACCTCATCGCTGATAAGACAACAACAGCATCG          |
| 32        | 44          | CCATTAACCATCGAAGTTTGCCTTTAGCTACATAAGACAAAAGG          |
| 33        | 44          | TAATAGTCGGAATCCTTTAAACAGTTCAAGTTGGGAAATGCAGAT         |
| 34        | 42          | CTTCATCACCGGAAGAGAGGTCATTTTTTTAAATATAGTTTG            |
| 35        | 42          | ATCATAACAGAGCCACAGGAGGTTGAGGCCAGAAATTAATAAG           |
| 36        | 42          | GGTCAATTATCACCCACCCTCAGAGCCACTGAGGTTTTGT              |
| 37        | 42          | AATACTGAAAATGTGAGGCATAGTAAGATTCAACTAGAAAAA            |
| 38        | 42          | AATGAAACATTAGCAGGGAAGGTAATACGCCAAAAGGTGGC             |
| 39        | 42          | TCTACGTTCAAATGGTCATAAATATTCATTTGCCATATCATA            |
| 40        | 42          | CCAGCGAACACTAAGAGGCTTTGAGGAGCGAAAGACCATCG             |
| 41        | 42          | AACATATAGAATCATAGCAGCACCGTAAATCACCACAATTAT            |
| 42        | 42          | CCTGTTGATACATTAGCTCAACATGTTGCGGATGTCAAAGC             |
| 43        | 42          | GAACCAAGAGTATTTTCATTTGGGGCGTAGATTTGCAACT              |
| 44        | 42          | AAAGTACTTTTGTGCAAACCTCAACAGATAGGCTGAAAAGG             |
| 45        | 42          | CCCGTATGGGGTCAAACTCTATTAAAGCAGGTCAGAAACCG             |

|    |    |        |         |      |        |         |         |        |               |
|----|----|--------|---------|------|--------|---------|---------|--------|---------------|
| 46 | 42 | CCACCC | TAGGCAA | GT   | AATGCC | CCCTG   | CGTACT  | GGG    | GAAAGC        |
| 47 | 42 | GCAGTC | TAGCATT | GACC | CCCTC  | AGAGCT  | TAACAT  | G      | AACCTA        |
| 48 | 42 | CCCACG | CATTTGT | AAAG | CGGAA  | ACAAAA  | ACGA    | AC     | TTTTTC        |
| 49 | 42 | GTATGG | GCCAGAC | GCC  | CATGT  | ACCGTAA | ACCAC   | CG     | CCCGGA        |
| 50 | 42 | ATAGGT | GCATAAG | GTAA | ACA    | ACTTTCA | AATCTAA | AT     | TTCGTC        |
| 51 | 42 | ACCA   | GTAA    | GA   | ACC    | GGTACT  | CAGGAG  | TTA    | ACGAGGAGCGGAG |
| 52 | 40 | ACATA  | ACGCCA  | AAT  | TACC   | AGTCAG  | GACG    | AAAAC  | GAGCGTCC      |
| 53 | 40 | GAAC   | GAGGGTC | GGT  | TGCG   | CGACA   | TATT    | GTGTT  | TGACCC        |
| 54 | 40 | GCGAC  | ATTCAG  | AAC  | GTAG   | AAAATAC | AGTC    | AG     | CCGTCACC      |
| 55 | 39 | TAATT  | GCTGA   | AT   | ATCG   | CGTTTT  | AATCG   | GATAT  | TTCAATAA      |
| 56 | 39 | CTTG   | ATATTA  | AT   | CCCT   | CAGAG   | CCG     | AAAACA | AAACAGTG      |
| 57 | 39 | GGAT   | AGCAAG  | GG   | AGAG   | GGTTG   | ATATA   | ACTTT  | GATTTTCT      |
| 58 | 34 | TCATTA | AAAA    | ATT  | CAC    | GCAA    | AGAC    | CCAT   | GCGAA         |
| 59 | 34 | ATGAG  | GAGCGG  | AT   | TATAT  | TTCGG   | TCC     | AGTGA  |               |
| 60 | 34 | ACCCT  | C       | GTT  | GAGAT  | TAC     | GAACTA  | ACGGA  | ATAAGAA       |
| 61 | 32 | CGAG   | AAAC    | AC   | ACTAC  | GAT     | TAAAC   | GGT    | AAAAT         |
| 62 | 32 | GAAC   | AAAG    | T    | AGAGG  | CTG     | ACGAC   | GATA   | AAAAAC        |
| 63 | 32 | TTG    | AAAAT   | CTT  | TGGG   | ATT     | TATC    | ACCGT  | CACCGA        |
| 64 | 30 | CCAA   | AT      | C    | TTCAA  | AAA     | AGAT    | TAA    | GAGGAAG       |
| 65 | 30 | GCA    | ATA     | GA   | ACCG   | CTC     | ACCG    | GA     | ACCAGAGC      |
| 66 | 30 | ACAG   | AT      | GT   | GCCG   | TCT     | TTT     | GCT    | CAGTACCAG     |
| 67 | 30 | CGT    | TTT     | CT   | TAGCA  | AT      | TAA     | ACT    | CCTTATTA      |
| 68 | 30 | CGC    | GAC     | AC   | CGAT   | AAG     | GTGA    | TTT    | CCTTAA        |
| 69 | 30 | CCAT   | AA      | AG   | CTCAT  | TT      | TAC     | CTT    | ATGCGATTT     |
| 70 | 30 | TGG    | CAT     | CG   | ATTCC  | CG      | GA      | ATTT   | CATTCCAT      |
| 71 | 30 | TTAT   | T       | TG   | C      | TTT     | TAC     | CGT    | TCCAGTAAGC    |
| 72 | 30 | TGAG   | AA      | TG   | CCCT   | CA      | AAC     | G      | CCTGTAGCATT   |

---

**Table S11. Staple sequences for the FV octahedron of 84-bp edge length.** The sequence is represented by colors; unpaired nucleotides with blue, and crossovers with orange, the 14-nt seed dsDNA domain with green, and the 4-nt dsDNA domain with red.

| Staple ID | Length (bp) | Staple sequences                                                                                     |
|-----------|-------------|------------------------------------------------------------------------------------------------------|
| 1         | 54          | GAGTACCTTTAATTGCTC <b>CG</b> GTGTC <b>TA</b> ATTCTGCGAAC <b>AG</b> CGAGCT <b>TC</b> ATCGC            |
| 2         | 54          | ATGCAAATCCAATCGCA <b>AGT</b> AAGGC <b>GC</b> TAGAAAAAGCCT <b>GC</b> GCCAT <b>AT</b> AGAAAA           |
| 3         | 54          | GCAGCAAATGAAAAATCT <b>AT</b> AAAAT <b>AG</b> CCGTCAATAGAT <b>ATT</b> TATTA <b>AC</b> CAATAA          |
| 4         | 54          | CACAGACAGCCCTCATAG <b>TGG</b> AGTG <b>ATA</b> AATAATTTTT <b>TC</b> AG <b>AATTT</b> CA <b>AC</b> GGGG |
| 5         | 54          | TTTGACAGTAAACAGAA <b>ATT</b> GC <b>TTT</b> ATTATT <b>CATTT</b> CA <b>AAT</b> TAC <b>TG</b> AAAGCG    |
| 6         | 52          | GGTGAATTATCACC <b>GG</b> CATTTTC <b>GC</b> TACCACCCTGGAAATTATT <b>CAT</b> TAAA                       |
| 7         | 52          | AAGAAACGATTTTTAGAGCAAGAAA <b>CA</b> ACTGGC <b>ATTTT</b> ATCCCAATCCAAAT                               |
| 8         | 52          | ATCGGAACGAGGGTAA <b>CAA</b> AGTACA <b>AG</b> AAAGAGGACAGCAGCGAAAGACAGC                               |
| 9         | 52          | AACCGCCACCCTCAG <b>AATTTT</b> CTGT <b>AA</b> AAAGGAGCAG <b>AACCGCCACCCT</b> CAG                      |
| 10        | 52          | AAGCGGATTGCATCAATATAATGCT <b>GT</b> TCGCAA <b>ATTATT</b> TATAGTCAG <b>AAGCA</b>                      |
| 11        | 52          | CTGATAGCCCTAAATGGTCAGTTGG <b>CC</b> TTTACAAAAGTCTTTAATGCGCGAA                                        |
| 12        | 52          | CGGAATTATCATCA <b>GTAA</b> CAGTACC <b>TA</b> AACATCAAGAAACCACCAG <b>AAGGAG</b>                       |
| 13        | 52          | GAATCAGAGCGGGAAG <b>AA</b> GA <b>ACTCA</b> ACATTGGCAGACGTGCTTT <b>CCT</b> CGTTA                      |
| 14        | 52          | GCTTAGATTAAGACTCTTCTGACCT <b>AT</b> TACCAGTATTG <b>AAAA</b> CATAGCGATA                               |
| 15        | 52          | GCGAAAATCCTGTTATCACCCAAAT <b>CC</b> GAAAGGAGCTGGTTT <b>GCCC</b> CAGCAG                               |
| 16        | 52          | CAACATGTT <b>CAGCT</b> CCGTTTTT <b>ATT</b> TAAGCCTT <b>AA</b> CAGACGACGACA <b>ATAAA</b>              |
| 17        | 52          | CTTTAATCATTGTG <b>AAA</b> AGGA <b>ATTA</b> CTTAGACTGGAGATGGTT <b>TAATTT</b> CAA                      |
| 18        | 52          | GAACGTGGACTCCA <b>ACGT</b> CATCGGA <b>AGGG</b> AAAGCCGG <b>CGG</b> CAATAAGAGAA                       |
| 19        | 52          | AGGTAGAAAGATT <b>CAT</b> CA <b>GT</b> TTACC <b>ATT</b> TGCAAAGAA <b>AGTT</b> CCCTTACC <b>CG</b>      |
| 20        | 52          | TGTCTTTCTTATCATT <b>CC</b> AAAT <b>AG</b> CGAGGGCTTT <b>AGT</b> TCTTGCCTGA                           |
| 21        | 52          | AGCACCGTAATCAGTAG <b>CGA</b> ATCAA <b>ACT</b> CCCTCAGAG <b>CCGA</b> GTATTAAGAGG                      |
| 22        | 52          | TCAGAGGGTAATTGAGCG <b>CT</b> TTAAG <b>AA</b> AGGAA <b>CCGAGG</b> ATATCAGTACCAG                       |
| 23        | 52          | TCCATCACGCAA <b>TTAAC</b> CTACCG <b>CT</b> ACCTACATTT <b>ACT</b> TTGCTTCTGTA                         |
| 24        | 52          | ACGAAAGAGGCAA <b>AGA</b> AT <b>AA</b> TCC <b>GG</b> CGCAGACGGT <b>CAAT</b> GAATAGGTGTA               |
| 25        | 51          | AAAACGCT <b>CT</b> ATTAATTT <b>TTTTTT</b> TAATTTTCCCTTAGAAT <b>CCT</b> AGACATTC                      |
| 26        | 51          | CGATTTAG <b>AC</b> CGACAAAT <b>TTTTTT</b> AGGTAAAGTAATTCTGT <b>CAT</b> GAGCCTA                       |
| 27        | 51          | AAAATAGC <b>GG</b> AGAGAGT <b>TTTTTT</b> TGCAGCAAGCGGT <b>CCACG</b> CGACAGGGC                        |
| 28        | 51          | CAACTAAT <b>AG</b> TAACATTT <b>TTTTTT</b> ATCATT <b>TTT</b> GCGGA <b>CAAAG</b> ACATGGCT              |
| 29        | 51          | ACTTAGCC <b>GT</b> CAGGAGG <b>TTTTTT</b> TTTAGTACC <b>GCCACCCT</b> C <b>TTA</b> AATGCC               |
| 30        | 51          | CCGGTATT <b>CC</b> CAGAACG <b>TTTTTT</b> AGTAGTA <b>AATT</b> GGGCTT <b>GAT</b> AGAATGA               |
| 31        | 50          | TGAAAGCATTGACA <b>GG</b> CCGGA <b>ACA</b> AGTTTGC <b>CTTT</b> ATAGCGT <b>TC</b> AGAACC               |
| 32        | 50          | ACCGGAAT <b>CC</b> ATGTAAT <b>TTTTTT</b> TTAGGCAGAGGC <b>ATT</b> CCACTATTA <b>AAA</b>                |
| 33        | 50          | CGGCAAAA <b>AT</b> TGGTTG <b>TTTTTT</b> CTTTGACGAGCACGTATA <b>ATA</b> AGAATA                         |
| 34        | 50          | TTTTGCGAAAATAC <b>AG</b> ACGGG <b>AAG</b> AGAGATA <b>AACCAA</b> GCAT <b>CTA</b> ATAAC                |
| 35        | 50          | GCCCGGACCTTCAT <b>CT</b> ACGTA <b>AA</b> ACTCAT <b>CTTT</b> GATCGCC <b>TG</b> GAACCG                 |
| 36        | 50          | CCACCACC <b>GT</b> CAAGAG <b>TTTTTT</b> AAGGATTAGGATT <b>AC</b> CCTGAACAAAG                          |
| 37        | 50          | TGAATTTA <b>TT</b> GAGGGAT <b>TTTTTT</b> GGGAAGGTA <b>AAT</b> ATTGAC <b>CA</b> TTGATAT               |
| 38        | 50          | TTATCAAC <b>AA</b> GTTACA <b>TTTTTT</b> AAATA <b>AA</b> CAGCCATATT <b>AGAA</b> CGCAA                 |
| 39        | 50          | CTAAAGGA <b>AA</b> CCGATAG <b>TTTTTT</b> TTGCGCCGACA <b>ATGG</b> TCAGGATTAGA                         |
| 40        | 50          | ATAACAGT <b>TA</b> ATTCTAC <b>TTTTTT</b> TAATAGTAGTAG <b>CAC</b> GCTGAGAGCCA                         |
| 41        | 50          | CCCGAAAG <b>AG</b> CCGCTT <b>TTTTTT</b> TTGCGGGATCGT <b>CACCCT</b> ATCATTAC                          |
| 42        | 50          | TAAGAACT <b>GT</b> CAAAA <b>TTTTTT</b> TCAGGTCTT <b>ACCCTGAC</b> GGCAGGGGA                           |
| 43        | 50          | TAACTGGCCAACA <b>GAT</b> AAT <b>CA</b> A <b>TA</b> CTTCTTT <b>GAT</b> GGTA <b>AT</b> TCGCTG          |
| 44        | 50          | TAAAGGGAT <b>C</b> AGACAA <b>TTTTTT</b> TATTTT <b>GA</b> ATGGCTATT <b>CACC</b> AGGGT                 |
| 45        | 50          | AATCGCGC <b>AA</b> GTACATA <b>TTTTTT</b> AAT <b>CA</b> ATATAT <b>GTGT</b> AAAAGAGTCTG                |

46 50 GCCAGTGC GTAACCATGTTCCAGAAAAACGGTCTATCGAGGTGCGAGAAA  
47 50 ATAAGGATCCTGAATTTACGAGGGTATTAACCAAGATTACC GCCCGACT  
48 50 CGAACAAAGTGCCGTCGTTTTTTAGAGGGTTGATATACACCAACCTAAA  
49 50 TGATTGGAATCCCCCTAATAAATTAGGAATACCACAGCAACA CGAGGGGG  
50 49 TCAGGGATATATTCGTTTTTTGAACCTATTATTCTACCATCGATAGC  
51 49 GATGGCAATATACAGGTTTTTTAGTGTACTGGTAATCCTGTAGCATT  
52 49 TTGGGAATTC AAATAAATTTTTATCCTCATTAAAGCATATCAAAATTA  
53 49 AAAATAGCACGGAATATTTTTAGTTTATTTGTCAA TGTAATGCTG  
54 49 TTTGAGGACAACGTAATTTTTCAAAGCTGCTCATTTCAATAATCGGC  
55 49 CCGAACGAACTTTTCATTTTCCAGTGAGACGGGCCAACATTATTAC  
56 45 TTAGAA GATTAATGCAAAGATTGCGTAGAGGTGACAAACCCTCA  
57 45 GAAGATGACATTTAACCGTTCAGTAAGTTTGGATAACGTGAGAT  
58 45 ACCATT AAGCTATATATTCGGTCGCTTCGAGCTGCTTAGAGCT  
59 45 AAAAAATTATCA GAACAGTGCCCGTATGTACCGTTTTCCAGACG  
60 45 CGTTATACAGTAGGCAGCGCCAAAGACACTACCTTTATATTTTAG  
61 44 AACTGACAGACCA GATCTTGACAAGAACGTTTCCAGCGATTATA  
62 44 TGCGGG AATTTTGACGCTAACGAGCGTAAAATAACTCATCGAG  
63 44 TAATAGTCGGAATCCTTTAAACAGTTCAGTTGGGAATGCAGAT  
64 44 GCCACCACCACC AAGGCAGTTCAGACGAGCACC AACTGTAGCG  
65 44 AAATGGAACCAGT AACCTTCTGACCTGAGAATCCTAACATCAC  
66 44 GGAAGGGGCAAGTCGCCGCGCTTAATGGCCCGAGATGGCCAC  
67 44 GGAATACTACGCA GAGGTGGCAACATATAAAAACTGAGTTAAG  
68 42 TGAGTGTCCACACCGTAGCGGTACGCTAACGTGGCCGTAAA  
69 42 TGATAAAACAAAGAGGTTATATAACTATCAATCAATTTAACA  
70 42 CTGAATATGAATTACAATTTCAATTTGATTACCTGACGGATT  
71 42 TCAGTGTCCACCA GACGATCTAAAGTTACAACCTAATCTCC  
72 42 AGTTGCTGGTTTTGT CATCGTAGGAATCTACCGCATATCCA  
73 42 CCACGCAACCGAA AAGAGGTCATTTTTTAAATATAGTTTG  
74 42 ATCATACACACCGCACCTTGCTGAACCTAAGGAATTGAGGAT  
75 42 TCCTAATCTTACC AACCCAGTACAATTCGAACCTGCCCAA  
76 42 CAGTCTCATGGAA GATTGCGTAGATTTTAAACAATAAGCAAAA  
77 42 CGCTCAACAAATTCAATTTAATGGTTGTTTCAAATTTAACC  
78 42 TTCATATTAGGTTGACGCGAGAAACTTAAATACCTCATATG  
79 42 TCCGGCTGGTTTACGCTTAATTGAGAAATTTAGTAGACCGTG  
80 42 AATACTGAAAATGTGAGGCATAGTAAGATTCAACTAGAAAAA  
81 42 CGCCTGATAAAGAAGGTTAGAACCTACCAGAATGTTTTTAA  
82 42 CACCAGATCAGAGCCATAGCCCCCTTAGCGTCAGTTACCAT  
83 42 TAGCAAAGGAGGTTGCCAGAGCCGCCGCCACCCCTGCCATC  
84 42 TCCTTATCCAAA GAATGAAATAGCAATCAAGAATAGGGGAA  
85 42 CGCATTATACATAATATGTTAGCAAACGACGCAATTACCGA  
86 42 GGTGTA CCAACTTTCGGAGATTTGTATCACCCCATTAAACG  
87 42 GGTAAA AAAGAGTAGCGCATAGGCTGGCTCATAAGGATAAAT  
88 42 GGGCGCTAAGAAA GAAGTTTTTGGGGTCAGGGCGATAGGGT  
89 42 TCACACGTTATTTAACTATCGGCCTTGCTTAGTAATGAGAAG  
90 42 TATCGTAGGCTCCTGGGATTTGCTAATGTCGTCAACACTG  
91 42 AGTTTCGCTTGAGTCTTGCTTTGAGGTCGTTGAATCAACAG  
92 42 TTTCAGCTAGCGTATACAACTACAACGAAGTTTTTAAACA  
93 42 CCTGTTGATACA TTAGCTCAACATGTTGCGGATGTCAAAGC  
94 42 GAACCAAGTAACCGATTTTCATTTGGGGCGTAGATTTGCAACT  
95 42 AAAGTACTTTTGA TGCAAACCTCAACAGACAACAAGAAAAGG  
96 42 TCTACGTTCAAATGGTCATAAATATTCATTTGCCATATCATA  
97 42 TGTTTTTAGATAG AATAAAGGGACATTCGCTCAAATCCAGA  
98 42 AACTCGTTATTAGAAAATCAACAGTTGACAAATATGCGGGTC  
99 42 AGTATT AAGGCAAGCCTTTGCCGAACGATACATTTGAGGAA

|     |    |                                            |
|-----|----|--------------------------------------------|
| 100 | 42 | GGTTATCAAGCATCCTGCAACAGTGCCATTAACATTTTAA   |
| 101 | 42 | ATTAATTATGAAACTTTACATCGGGAGACAGGTTTTATACTT |
| 102 | 40 | TTGCCTGAGTGAGGAACGGTACGCCAAGCGTTCACCAG     |
| 103 | 40 | AACAAGCAAGAAGTCCTGAACAAGACTTTCCACAAGATT    |
| 104 | 40 | ACATAACGCCAATACCAGTCAGGACGAAAACGAGCGTCC    |
| 105 | 40 | CGTTTTTCATCGTGCAAAATCACCAGTATTGGCCGAGCCGC  |
| 106 | 40 | CCCAATAATATGCAGAGAGAATAACAAAAGAATTAAGAC    |
| 107 | 40 | TACGTGAACCTGAAATCAAAGAATACGCCGTGGCGCTA     |
| 108 | 40 | CCAAGCGCGAAGTTTTTCATGAGGAACGGATATGATGAAC   |
| 109 | 39 | TTAATTTTCAGCATAGGTCTGAGAGAAAGGGCAAGCCAA    |
| 110 | 39 | TTAGTAAATGACAATAGGAACCCATAAACAGTTTAATTG    |
| 111 | 39 | TAATTTGCTGAATATCGCGTTTTAATGAGGCTTCAATAA    |
| 112 | 39 | ATCAATATCACCCAGAAGATAAAACATTGGGCATTTCGAC   |
| 113 | 39 | GAATATACATATAAATCCTGATTGCGTCATAAAACAAA     |
| 114 | 34 | TTTTCATACAGAAACGTCACCAATGAAGAAACA          |
| 115 | 34 | AGCCCTTTAATATCGAATTAAGTGAACAGCGGGG         |
| 116 | 34 | TGTGTCGACACTAATGCCACTACGAAGGAGTATA         |
| 117 | 34 | ACAATATGTTGTAGGTGAGGCCACCGAGAGTGA          |
| 118 | 34 | GCACTAAAAGGGCGTTTGAACAAGAGTTTCGA           |
| 119 | 34 | TAGCAAAGAAGCCATGTAGAAACCAACAGTGA           |
| 120 | 34 | ACCCTCGTTGAGATACGAACCTAACGGAAAACAGC        |
| 121 | 32 | TATAAAGTAGCTTGAACCCTAAAGGGAGCCCC           |
| 122 | 32 | CGAGAAACATAAGAACGATATAGAAGGCTTAT           |
| 123 | 32 | CTGAGACTCGAACCGCATCACCGGAACCAGAG           |
| 124 | 32 | GCGGATAAGTTACCAGAAAGTAAGCAGATAGC           |
| 125 | 32 | TCACCGTACGAACGAGCGACCTGCTCCATGTT           |
| 126 | 32 | CCTGGCCCTAGAGGCTGACGACGATAAAAACC           |
| 127 | 32 | AATCGTCGATGGAAAGCCATTGCAACAGGA             |
| 128 | 30 | TCACAAAGAGGCCACACCGACTTGAGCCAT             |
| 129 | 30 | GACACCAGCCTTTATTTAACGTCAAAAATG             |
| 130 | 30 | CCAAATCTAAAGACCAACGGCTACAGAGGC             |
| 131 | 30 | CCCTGCGCAAGCCGCCACCACCCTCATT               |
| 132 | 30 | GTTAAAGCTTCAAAGAAAGATTAAGAGGAAG            |
| 133 | 30 | GGTTTTTCACCAGATCGCCATTAATAAATA             |
| 134 | 30 | TTTGATGTCATCAATCCTGATTATCAGAT              |
| 135 | 30 | CGTGGCATTTAGACTAAACAGGAGGCCGAT             |
| 136 | 30 | AACCGATCAAATCTGAGAAGAGTCAATAG              |
| 137 | 30 | GCGTACTCCCTTATATGGTGGTTCCGAAAT             |
| 138 | 30 | ATTTGCATAGATATGCAGAACGCGCCTGT              |
| 139 | 30 | CCATAAAGCTCATTTACCTTATGCGATTT              |
| 140 | 30 | GCTTGATTTGCGAAGAAATAGAAAGGAACAA            |
| 141 | 30 | TGGCATCGATTCCCGGAAGTTTCATTCCAT             |
| 142 | 30 | AGTTTGAAGATTAGATCTTTAGGAGCACTAA            |
| 143 | 30 | TGGAAAAGAGGCGAGAAATACCAAGTTACAA            |
| 144 | 30 | ACGCCAATAATTATAAATAAGAATAAAC               |

---

**Table S12. Staple sequences for a FV pentagonal bipyrmaid of 42-bp edge length.** The sequence is represented by colors; unpaired nucleotides with blue, and crossovers with orange, the 14-nt seed dsDNA domain with green, and the 4-nt dsDNA domain with red.

| Staple ID | Length (bp) | Staple sequences                                       |
|-----------|-------------|--------------------------------------------------------|
| 1         | 54          | CCTTATTAGCGTTTGCCATCTTTTCATTCATCGGCATTTTTCATTATGCCACCC |
| 2         | 54          | AAACAGGGAAGCGCATTAGACGGGACCAGCCTTTACAGAGAACAGTTAGAGATA |
| 3         | 54          | CTAAAGTTTTGTCGTCTTTCCAGAACAGCCCTCATAGTAATCCGAGCGGAG    |
| 4         | 54          | TCATTAAGGTGAATTATCACCGTAGGGAAGGTAATATTGAATCGTACCATTA   |
| 5         | 54          | GTGAATAAGGCTTGCCCTGACGACTAATCAACGTAACAACTCAGAGCATTGTG  |
| 6         | 54          | TTTGAAGCCTTAAATCAAGATTAGGACGCGAACCTCCCGAGCCATATCGTCTTT |
| 7         | 52          | CTGAGTTTCGTCCCGTTAGTAAATGTCAACAGTTACCCATGTACCGTAACA    |
| 8         | 52          | CTTTGAGGACTAAAAGAATACACTACAAGCGCGAAGCAACGGCTACAGAGG    |
| 9         | 52          | ATTATTCTGAAACAGAGAGGGTTGATACTCAGGATGCCTATTTTCGGAACCT   |
| 10        | 52          | AGCCTTTAATTGTACACGCATAACCGAAGGCCGCAAAAAGGCTCCAAAAGG    |
| 11        | 52          | AAATATGCAACTAAATTTTCGCAAATGGGGCGGAGGTAGCTCAACATGTTTT   |
| 12        | 52          | TCAGAAGCAAAGCGAGCAAACCTCCAACCTTTTGATTACCTGACTATTATAG   |
| 13        | 52          | ATCAGATATAGAAGTTGCTATTTTGACGCTAACGCGCCAATAGCAAGCAA     |
| 14        | 52          | AATCCAAATAAGAAAGAATTAAGTACGCTAATATCGCCATATTATTTATCCC   |
| 15        | 52          | ACATTATTACAGGTAAAGACAACACTAACCAAAATAACGAACTAACGGAACA   |
| 16        | 52          | ACCTTCATCAAGAGAAACACCAGAACTCACTTTAGGCGCATAGGCTGGCTG    |
| 17        | 52          | TTTACCAGCGCCAACACCGACTTGAAGTAGCACCATAGAAAATTCATATGG    |
| 18        | 52          | AGTAGCGACAGAATCATAATCAAAAACCTCAGAGATAGCAGCACCGTAATC    |
| 19        | 52          | TAATGCAGAACGCGTCGGCTGTCTTGTACCACACTAAACAACATGTTCCAGC   |
| 20        | 52          | GAAAAGTAAGCAGATATTACGCAGTAGTGGCAACAACCGAAGCCCTTTTTAA   |
| 21        | 52          | TTGAGGCAGGTGAGAACGCTCATACATAAGTTTTACCAGCATTGACAGGAGG   |
| 22        | 52          | AGTCTCTGAATTTACCGTTCAGTACCTCATTAAAGCCAGGACAGTGCCTTG    |
| 23        | 52          | ACCAACCTAAAACGAAAGAGGCAAGAAAATACGTAATGCAATACAACGGAG    |
| 24        | 52          | CAGTACCAGGCGGATAAGTGCCGTTGAGGATTAGGATTAGTGTACCGCCACC   |
| 25        | 52          | CCGACAATGACAACAACCATCGCCTCTAACAGCTTGATATTGGATCGTCAC    |
| 26        | 52          | CCAAAAGGAATTACGAGGCATAGTAGCATTCAACTAATGCAAGGCTTTTGCA   |
| 27        | 52          | AGATTTAGTTTGACCATTAGATACAGGTTGATTCCCAATTCAGGTGGCATCA   |
| 28        | 52          | AGAAGTGGCATGATTAAGACTCCTAACGCAATAATAACCTGAAACGCAAAA    |
| 29        | 52          | AGCTTCAAAGCGAACCAGACCGGAGAGACTTCAAATATCGAACATTTTTCGG   |
| 30        | 52          | GAGCATGTAGAAACCAATCAATAACCAAAAATAATATCCCTAGAACAAGCAA   |
| 31        | 51          | GCTATATTTTCATAAGGTTTTTTTTGAACCGAAGTACCGAGATACATAACG    |
| 32        | 51          | ATCCTGAATCTAATTTGTTTTTTCCAGTTACAAAATAAAACAGCAGAAAA     |
| 33        | 51          | CAGAGGGTAAAGAATTGATTTTTTTGTTAAGCCCAATAAATCCTAATTTAC    |
| 34        | 51          | AGAAGGAAAGAATAAGTTTTTTTTTATTTTGTACCAATCATTCATAAAT      |
| 35        | 51          | GATATTCATTTTCAGGGTTTTTTTTATAGCAAGCCCAATAGGATCCGACCTG   |
| 36        | 51          | AGTACCTTCTGGATAGTTTTTTTTCGTCCAATACTGCCGACGGAAATTAT     |
| 37        | 51          | ACCAGACGAAGGACAGATTTTTTTTGAACGGTGTACAGACCAATCCACCAC    |
| 38        | 51          | GCCAGCAAACGGAAACGTTTTTTTTTACCAATGAAACCATCGCCACCAGTC    |
| 39        | 50          | TTTCCATTAAATCGCCTTTTTTTTTGATAAATTGTGTCTAGCGTAACGAT     |
| 40        | 50          | CCCCAGCGCAGGCAAGTTTTTTTGCAAAGAGAGAATCCTTTCGGGGAGGT     |
| 41        | 50          | ATAAGTCCATTTTTCATTTTTTTTCGTAGGAATCATTACCGAGTTAACAA     |
| 42        | 50          | GAACCGGAGATGTAATTTTTTTTTTAGGCAGAGGCATCCGATAGTTGCG      |
| 43        | 50          | AGGCTTGCATAATAAGATTTTTTTGAATATAAAGTACCAATGGAAAGCGC     |
| 44        | 50          | TTTTGCTAAAGAAAGGATTTTTTTTCAACTAAAGGAATCGGGGTTTTGCT     |
| 45        | 50          | ACCACCGGACGCCACCTTTTTTTTCAGAGCCACCACCGGAATACCCAAA      |



|    |    |                                                                                        |
|----|----|----------------------------------------------------------------------------------------|
| 46 | 50 | TTGAGATG <b>GT</b> TATGCGA <b>TTTTTTT</b> TTTTA <b>AAGAACTGGCC</b> GGTCATAGCCC         |
| 47 | 49 | TTCATTCC <b>AA</b> TAGTAG <b>TTTTTTT</b> TAGCATT <b>AA</b> CAT <b>CCC</b> ACTACGAAGGC  |
| 48 | 49 | CTGTAGCA <b>TT</b> TACTTA <b>TTTTTTT</b> GCC <b>GGAA</b> CGAG <b>GGCGC</b> TGCGAACGAGT |
| 49 | 49 | AGATTTAG <b>GT</b> TGCCAG <b>TTTTTTT</b> AGGGGGT <b>AATAGTAC</b> GTTTTAATTCG           |
| 50 | 49 | GAGACTCC <b>TGCC</b> ACCC <b>TTTTTTT</b> T <b>CAGAA</b> CCGC <b>CACCG</b> CTGCTCATTCA  |
| 51 | 49 | CAACCGAT <b>TGA</b> ATCC <b>TTTTTTT</b> C <b>CTCAA</b> ATG <b>CTTTAA</b> GAATAACATAA   |
| 52 | 47 | GCTATCTTTATAAAACAGAGCCG <b>CC</b> ATAAA <b>GTG</b> TTAG <b>CAA</b> ACGT <b>AG</b> A    |
| 53 | 47 | CAGGTCTTAAGAGGTATGTTTAG <b>AA</b> ATTG <b>CTC</b> AGGT <b>CAG</b> GATT <b>AG</b> AG    |
| 54 | 47 | GTTAATAAAGCGAGACTTTGAAA <b>GC</b> GATA <b>AAAT</b> CATA <b>ACC</b> CTCGTTT             |
| 55 | 47 | AGCCGCCGACGGGGTCAAAGGT <b>ACT</b> GGTA <b>ATGG</b> CTTTT <b>GATG</b> ATAC              |
| 56 | 47 | GACGACAATCATCGAAGAGCAAG <b>AAA</b> ACCA <b>AC</b> CTTATCATT <b>CCA</b> AGA             |
| 57 | 47 | ACGAGGGTAACAAAGTAAATCAT <b>AAT</b> TATA <b>CAA</b> ACACTCATCTTT <b>GA</b>              |
| 58 | 47 | ATGCCCCGGTTTAGCGAATAAT <b>AAT</b> CACC <b>GT</b> ATA <b>AGT</b> ATAG <b>CCCG</b> G     |
| 59 | 47 | TCTCCAAATTTTGCCTCGAGCCA <b>GGG</b> GAGT <b>TAT</b> ATATT <b>CGGT</b> CGCTG             |
| 60 | 47 | ATAATGCTCTGAAAAGACGGTCA <b>AT</b> CATTT <b>GGT</b> CAATA <b>ACCT</b> GTTTA             |
| 61 | 35 | AGGAGTGT <b>AA</b> AGTAAT <b>TTTTTTT</b> CTGTCCAGAC                                    |
| 62 | 35 | AATAGGTG <b>TAT</b> TTTTT <b>CTTTTTT</b> ACGTTGAAAA                                    |
| 63 | 34 | CAGACTGT <b>AT</b> GGGAAG <b>TTTTTTT</b> AAAAATCTAC                                    |
| 64 | 34 | AAATACAT <b>AC</b> ACCAGAA <b>TTTTTTT</b> CCACCACCAG                                   |
| 65 | 34 | ACGGGTAT <b>TA</b> ACAATGA <b>TTTTTTT</b> AATAGCAATA                                   |
| 66 | 33 | TTCGAGGT <b>GC</b> GAAAGA <b>TTTTTTT</b> CAGCATCGGA                                    |
| 67 | 33 | CACAAACA <b>AG</b> CCCGTA <b>TTTTTTT</b> TAAACAGTTA                                    |
| 68 | 33 | AAGAGGA <b>AG</b> GAGCTTA <b>TTTTTTT</b> ATTGCTGAAT                                    |
| 69 | 33 | TCAAAAAT <b>GG</b> ACCATA <b>TTTTTTT</b> AATCAAAAAT                                    |
| 70 | 32 | ATTTGTAT <b>CA</b> ACGG <b>TC</b> TTTTT <b>CATG</b> AGGA <b>AG</b>                     |
| 71 | 32 | CTCAGAAC <b>CCA</b> AGAG <b>AAA</b> AGTATTAAGAG <b>GCT</b>                             |
| 72 | 32 | CCTCAGCA <b>GA</b> ATTT <b>CTGG</b> TTTATCAGCTT <b>GCT</b>                             |
| 73 | 32 | ATTCTACT <b>AT</b> ATAAC <b>AT</b> ACGGTGTCTGGA <b>AGT</b>                             |
| 74 | 32 | GATGGCTT <b>AC</b> CCGAA <b>ATT</b> GCATCAAAA <b>AGATT</b>                             |
| 75 | 32 | AAAGAAGT <b>TA</b> ATACC <b>AAA</b> AGATTCATCAGTT <b>G</b>                             |
| 76 | 32 | GCCGTTTT <b>TGA</b> ACAA <b>GT</b> TTTTATCAACA <b>ATAG</b>                             |
| 77 | 32 | GACACCAC <b>GCC</b> GAG <b>AG</b> CCGAACAAAGTT <b>TACC</b>                             |
| 78 | 32 | AGTAACAGTATAAAT <b>CG</b> ATTGGCCTTGAT <b>ATT</b>                                      |
| 79 | 30 | CTCCAT <b>GT</b> CCACA <b>GGT</b> ACAAACTACA <b>ACGC</b>                               |
| 80 | 30 | CGCCAA <b>CG</b> CGTTTT <b>TT</b> TATCCGGTATT <b>CTAA</b>                              |
| 81 | 30 | CGAGAA <b>TAA</b> ATA <b>GG</b> ATTTTTT <b>GTTTAA</b> CG                               |
| 82 | 30 | CCTCAT <b>TT</b> ACCCA <b>AA</b> TCTTGACA <b>AGA</b> ACCG                              |
| 83 | 30 | ATTCAT <b>TG</b> AGGGA <b>GA</b> CAAAAGGGCGAC <b>ATT</b>                               |
| 84 | 30 | AGGACG <b>TG</b> CGCGT <b>TAG</b> TTTGCCTTT <b>AGCGT</b>                               |
| 85 | 30 | TGAGAA <b>TACA</b> ACT <b>TA</b> ATTTT <b>CTGT</b> ATGGGA                              |
| 86 | 30 | CCAGAG <b>CT</b> TACC <b>AA</b> CCAGCTACA <b>ATTTT</b>                                 |
| 87 | 30 | ACCCAC <b>AAT</b> TGAG <b>CA</b> CACCCTGAACAA <b>AGT</b>                               |
| 88 | 30 | AATTAC <b>CT</b> TTAAT <b>TG</b> AGTAGTAA <b>ATTGGGC</b>                               |
| 89 | 30 | GCAAGG <b>CAT</b> CACC <b>AC</b> CATTTGGGA <b>ATTAGA</b>                               |
| 90 | 30 | TCAGAA <b>CA</b> CCGCC <b>TC</b> ACCGGA <b>ACCAGAGCC</b>                               |

---

**Table S13. Staple sequences for the MV tetrahedron of 42-bp edge length.** The sequence is represented by colors; unpaired nucleotides with blue, and crossovers with orange, the 14-nt seed dsDNA domain with green, and the 4-nt dsDNA domain with red.

| Staple ID | Length (bp) | Staple sequences                                                                                                     |
|-----------|-------------|----------------------------------------------------------------------------------------------------------------------|
| 1         | 59          | CAAAC <b>GT</b> TATAA <b>ACGCTGCGCGTAACCT</b> GGCAA <b>ACTGCGCAACTGTTGT</b> TTAATGGGAT                               |
| 2         | 58          | AGGAGCGGG <b>TCGCTGGCAAGTGT</b> <b>AGAATTGAGGAAGTTA</b> TATATCTTTAGTGATAG                                            |
| 3         | 57          | TAATGA <b>AT</b> GTA <b>AA</b> <b>GAGAACAATATTACCC</b> GCCT <b>GCC</b> GGCCTCAGGA <b>ATTT</b> TCGCACT                |
| 4         | 56          | TTTT <b>CAC</b> <b>CA</b> ATT <b>CG</b> <b>TCATCACGCA</b> AA <b>TTAG</b> TTAGAA <b>AGTCCACGCTG</b> TT <b>GC</b> CTGC |
| 5         | 56          | TCACGAC <b>GGGAAGG</b> <b>GAATATCTGGTCAGT</b> ACCACAC <b>ATCGGCAAAATCCCG</b> CGGAT                                   |
| 6         | 54          | GGGCG <b>CT</b> GAAAT <b>TTGGATTATTTACATTGGC</b> ATTTTTATAAT <b>CTGCCACCGAG</b>                                      |
| 7         | 54          | AATGAA <b>ACAAACT</b> <b>AG</b> CTAACTCACAT <b>TTTTGCGTTGCGTCACTCCT</b> AGCAAT                                       |
| 8         | 53          | CCCTA <b>AGAA</b> ACCAGGCA <b>ATTT</b> CGCCATTCGC <b>CGGTGTAGTTTTTTT</b> ATGGGCG                                     |
| 9         | 53          | TAAAAG <b>AAAACAGGAGGCCGATT</b> ATTTTAGACAGGGAGCTTGACGG <b>GC</b> ACCGC                                              |
| 10        | 53          | CTGGCC <b>TTT</b> GAGAGAGTTGC <b>ACA</b> ACAGCT <b>TTTTTTT</b> GATTGCCCGTCCACTAT                                     |
| 11        | 53          | ACGTCAA <b>AG</b> ATCAC <b>CA</b> AAGGGAG <b>CCCCGATT</b> AAACGGTACGCC <b>CT</b> GTGAGA                              |
| 12        | 51          | ACCTTCT <b>TAAGCGTAAGAATACGT</b> CAGAAGATA <b>AAAACAGAGT</b> GGTCAGTA                                                |
| 13        | 51          | CATCACCT <b>TCCTCAA</b> ATAT <b>CAAACCGCGCCGCTACAGGGCGT</b> GGTTGCTT                                                 |
| 14        | 50          | TTTCT <b>C</b> ACCGTT <b>GGGGTACCGAGCTCGA</b> ACTCTAGAGGAT <b>CCGCCCGC</b>                                           |
| 15        | 49          | TTAACA <b>CGCCAGCCATTGCAACAT</b> ACGCTCAT <b>GGAATA</b> CA <b>GAGATAGA</b>                                           |
| 16        | 49          | TGACGA <b>GTGATTAGTAATAACAT</b> TCCTGAGTAGA <b>AGAACTA</b> ATCTAAAG                                                  |
| 17        | 49          | TAAAGAA <b>CA</b> ACC <b>CGT</b> CG <b>GG</b> AGTGT <b>TGAAAGGAAGGGAAGT</b> AGCCGTAAAG                               |
| 18        | 49          | AGGTCGTGAGACGG <b>GG</b> CAAGC <b>GT</b> CAGAGCGGGAG <b>CTGT</b> CTGT <b>CA</b> ATCAT                                |
| 19        | 49          | TGACCGGTAAAACG <b>AT</b> TCCGA <b>ACCGCCGCGCTTAATC</b> TCAAT <b>CC</b> GATCG                                         |
| 20        | 48          | CCGA <b>AA</b> CCACCAG <b>TTTTTTT</b> AAGGAGAT <b>CTGGC</b> CAATTCG <b>AA</b> CAATAT                                 |
| 21        | 47          | CCAG <b>CA</b> GGGGACG <b>TTTTTTT</b> ACGACAGTTGCAAGGCGAT <b>TG</b> CTGCAT                                           |
| 22        | 47          | GGT <b>GG</b> CGGCCAGT <b>TTTTTTT</b> GCCAAGCTTGCA <b>TGCCCA</b> GAACGTGC                                            |
| 23        | 47          | TAA <b>AGT</b> CGGCCA <b>TTTTTTT</b> ACGCGCGGGGAGAGATTCCA <b>CT</b> TGACGC                                           |
| 24        | 46          | ATGCGGAACGAGCACTAACAT <b>AGATTAGAGCCGTCAA</b> AAAGCGAA                                                               |
| 25        | 46          | TGAA <b>CG</b> GCGAAA <b>TTTTTTT</b> AACCGTCTACATTATCATT <b>TG</b> CGTATT                                            |
| 26        | 45          | CACTAAAT <b>GGT</b> GGCG <b>AGTTC</b> AGTT <b>TGGAACAAGAT</b> TGAAAGCC                                               |
| 27        | 44          | AGGTCACGT <b>TAT</b> TCAG <b>GTCA</b> ACAGTT <b>GAAAGGCGGTC</b> ATCAA                                                |
| 28        | 43          | GAATAG <b>TTT</b> CGAGATAGGGT <b>TG</b> ATTCTC <b>TTTTTTT</b> GTGGGAA                                                |
| 29        | 42          | TACAAA <b>CTT</b> CCTGT <b>TCATCTG</b> CAGTT <b>GC</b> AGCTT <b>TG</b> AACGAA                                        |
| 30        | 42          | TTTTGA <b>AAA</b> ATAC <b>CCCGGCACCGCTT</b> CTAACCGT <b>GAG</b> CCAGC                                                |
| 31        | 42          | TGCCTA <b>AC</b> GTGCC <b>AAAGTTGGGTA</b> ACG <b>CCGCCAGCA</b> GCAGCA                                                |
| 32        | 42          | GTGCGGG <b>TTT</b> CTTCGCTATT <b>AC</b> AGGGTTTT <b>TTTTTTT</b> TCCAG                                                |
| 33        | 42          | GCTCAC <b>AG</b> CGGTT <b>TTGCGGAACAAGA</b> ACGTTATT <b>AC</b> ATTCT                                                 |
| 34        | 41          | TTTCCA <b>TTTTTTT</b> GT <b>CGGGAAACCTGTT</b> GAGTGATCGGCCT                                                          |
| 35        | 41          | CATCGT <b>GGT</b> GCC <b>GAACATCGCCATTAAT</b> GGCTATTAGACTT                                                          |
| 36        | 40          | AGTTTGAGTAA <b>TACACGACCAGTAAT</b> CTGAA <b>AG</b> TTATCC                                                            |
| 37        | 40          | GGGGATGTGCATA <b>ACAGTGCCACGCTA</b> ATAT <b>CCCT</b> GGGG                                                            |
| 38        | 40          | GGTCATA <b>TTT</b> GTTCCTGT <b>GAGGGTGGTTTTTTT</b> TTTTTC                                                            |
| 39        | 40          | GGCGAA <b>CGA</b> ACC <b>TCAAATCAAGTTTTA</b> CGTGGACTCCA                                                             |
| 40        | 37          | <b>AGTG</b> GATT <b>CACCAGTCC</b> AGGGCGATGG <b>TTT</b> ACTACG                                                       |
| 41        | 36          | ACTTCT <b>T</b> CACGTA <b>TC</b> AGGCGAAAATC <b>TTT</b> GTTTGAT                                                      |
| 42        | 36          | CCACCA <b>GGGCACA</b> GC <b>AACT</b> CGTATTA <b>ATCCTTT</b> GC                                                       |
| 43        | 36          | AGCGAGT <b>AT</b> GGGGTCGAGGTGATA <b>ATAC</b> TTT <b>GAGG</b>                                                        |
| 44        | 35          | GGCCAA <b>CCT</b> ACAT <b>TACA</b> ACATACGAGCT <b>TTGA</b> AGCA                                                      |
| 45        | 25          | ATTT <b>AA</b> ACATT <b>TTTTTTT</b> AATGTG                                                                           |
| 46        | 23          | TCAAT <b>CGAA</b> AGG <b>GA</b> ATTTTAA                                                                              |

|    |    |                                  |
|----|----|----------------------------------|
| 47 | 23 | TGCTGGT <b>GAGAGCCT</b> GGCGAAAG |
| 48 | 23 | TTTCAT <b>GAAGTATT</b> AGTCTTTA  |

---

**Table S14. Staple sequences for the MV tetrahedron of 63-bp edge length.** The sequence is represented by colors; unpaired nucleotides with blue, and crossovers with orange, the 14-nt seed dsDNA domain with green, and the 4-nt dsDNA domain with red.

| Staple ID | Length (bp) | Staple sequences                                                                                                          |
|-----------|-------------|---------------------------------------------------------------------------------------------------------------------------|
| 1         | 61          | CTTTGACCC <b>TT</b> AGCGATTATA <b>CG</b> CCTTGAT <b>TTTTTTT</b> <b>GTAA</b> CAGT <b>GCCGTT</b> CAACACTCAT                 |
| 2         | 61          | ATAATGCTG <b>TT</b> GCTCAACATG <b>TC</b> AGTATG <b>TTTTTTT</b> <b>TTAG</b> CAA <b>CGTAGAT</b> GTTGCTGAAT                  |
| 3         | 60          | CCACGG <b>AG</b> TATAG <b>CTTAA</b> ACAG <b>CTTGAT</b> AAGACT <b>TGAAT</b> CAAG <b>TTTGCC</b> TTGTCACAAT                  |
| 4         | 60          | CCGCCG <b>CT</b> CAAGA <b>GGCTTTT</b> <b>GCGGGAT</b> <b>CCTT</b> GAC <b>ACTGGCTGAC</b> <b>CTTCAAT</b> TGAGGTTGAG          |
| 5         | 57          | TCCAGT <b>AT</b> GTTAC <b>TTT</b> AAT <b>CATTG</b> T <b>GAC</b> CCTCA <b>ACC</b> CGT <b>CACCGAT</b> <b>TT</b> TGAGCCA     |
| 6         | 57          | AAATTA <b>TGA</b> ATT <b>AGT</b> AG <b>ACTGGAT</b> AG <b>CGCA</b> ACACT <b>TCAG</b> TTGATT <b>CCCAT</b> <b>TT</b> TCTGCGA |
| 7         | 56          | TGGCAT <b>CT</b> AGATT <b>TAT</b> CA <b>ACTAATGC</b> AAGTCAG <b>GT</b> GTGTCGAAAT <b>CC</b> <b>TT</b> GACCTG              |
| 8         | 56          | CCGCCAC <b>CT</b> TTAG <b>CGAA</b> AGAG <b>GAAGCCGAA</b> CCGAT <b>AGAGGGTTGAT</b> ATA <b>AA</b> TAAAGT                    |
| 9         | 56          | TCAGAG <b>CT</b> TTTCG <b>GAAAT</b> CAG <b>GTCTTT</b> AAACAC <b>CACT</b> GACCAACT <b>TTT</b> TAAAGAGG                     |
| 10        | 55          | ACCATT <b>ACA</b> ACCG <b>AGCA</b> AGAT <b>ATTAC</b> GT <b>TTAAAT</b> GCGAGAGGCC <b>CTTT</b> TAATTGC                      |
| 11        | 55          | AATCTC <b>CCT</b> TAGAGCTTAATATGGGAT <b>TTTTTT</b> <b>ACGCCACCCT</b> CAG <b>AG</b> AACCC                                  |
| 12        | 55          | CGAAAG <b>A</b> GAATACACTAAAAGAGTAA <b>TG</b> TCACC <b>CGAGGCTGAG</b> ACT <b>CCC</b> AGCAT                                |
| 13        | 54          | TTCATGAGGAT <b>CATT</b> AA <b>ACGGGT</b> AAAAT <b>ACGTA</b> AGCCCTCATAG <b>TTT</b> GCGTAA                                 |
| 14        | 54          | GGTCAG <b>TC</b> AAGCG <b>CA</b> ACAACATT <b>TAAT</b> GCC <b>ACTACGA</b> AGGC <b>ACT</b> AAACGAAAG                        |
| 15        | 53          | TCCTTTTGAT <b>TT</b> CAT <b>TTTT</b> <b>GCGGATG</b> GA <b>AAAAA</b> AGGG <b>CTC</b> AAAT <b>TTT</b> TAATTG                |
| 16        | 53          | AGGCAA <b>AC</b> AGCAT <b>CGGA</b> ACGAGGG <b>TGGCT</b> ACAGAGGG <b>TTT</b> GAGGA <b>ATG</b> GAACC                        |
| 17        | 52          | TATCGG <b>TC</b> CAGAC <b>CGGA</b> AGCAA <b>T</b> CAGGT <b>CAGG</b> ATTAGAGAGT <b>AT</b> <b>TC</b> GGAAA                  |
| 18        | 51          | CGCCAAA <b>TC</b> GAGGCATAGTAAG <b>GT</b> CCA <b>ATACT</b> GCGGA <b>ATCT</b> ATATTCAT                                     |
| 19        | 51          | TTATAGT <b>CTA</b> AGCGGAT <b>GCATCA</b> AG <b>ACAACA</b> ACC <b>ATCGCC</b> TACCGATAT                                     |
| 20        | 50          | TATTAT <b>TTTT</b> GAAACATGAA <b>AT</b> TGCC <b>CTTTTT</b> TTGCTATTAT <b>TTT</b> C                                        |
| 21        | 49          | TGAATC <b>CATT</b> AC <b>CTTAT</b> GCGAT <b>TACT</b> GGCT <b>CATT</b> AT <b>AC</b> CGATACATAA                             |
| 22        | 49          | ATTCGG <b>TA</b> AGCT <b>GT</b> CATT <b>CAGT</b> TGGCT <b>TGCC</b> TGAC <b>GAGC</b> CCTGACTA                              |
| 23        | 49          | TTATTT <b>CAG</b> AGCCA <b>CC</b> CGTCAG <b>TTG</b> CGCC <b>GACA</b> ATAAAGAT <b>TT</b> CAGAC                             |
| 24        | 48          | ACG <b>AGA</b> ATTCTAC <b>TTTTTTT</b> TAATAGTAGTAG <b>AC</b> ATATA <b>AA</b> TCATAA                                       |
| 25        | 48          | GAGTTTCGT <b>CG</b> ACGTT <b>AACA</b> ACT <b>TTCA</b> ACGAAAGGA <b>AC</b> CTCAGAGCC                                       |
| 26        | 47          | CACC <b>CT</b> AAAGGT <b>TTTTTTT</b> GCAACATATA <b>AAAT</b> CACCG <b>TC</b> TTGCTT                                        |
| 27        | 47          | CTCC <b>AA</b> GCCTCA <b>TTTTTTT</b> TACATGG <b>CTTTT</b> GAGATA <b>AA</b> TACGTTGG                                       |
| 28        | 47          | AAGT <b>GC</b> ACCCTCA <b>TTTTTTT</b> GAGCCGCCACC <b>AGG</b> CGGG <b>TG</b> CCTTGCA                                       |
| 29        | 47          | ACAG <b>AA</b> ACAAAT <b>TTTTTTT</b> AAAT <b>CCTCATT</b> AA <b>AGA</b> ACCG <b>AA</b> GAACGA                              |
| 30        | 47          | AGGGAT <b>CAA</b> ACT <b>TACA</b> AC <b>GCCT</b> AAAGT <b>TG</b> GAGTGAGACTAAAGACTTT                                      |
| 31        | 47          | TTT <b>GGT</b> CATTAAAT <b>TTTTTTT</b> GGTGAATTAAAATCACCG <b>AT</b> TACCGT                                                |
| 32        | 46          | CGAT <b>CT</b> GTAGCAT <b>TTTTTTT</b> TTCCACAGTGT <b>TTAG</b> CTAT <b>AT</b> TAACGG                                       |
| 33        | 45          | CAATAGAAA <b>AG</b> CGGAC <b>ACA</b> AAT <b>ATCG</b> CGTT <b>TGA</b> ATTT <b>CC</b> CGGAAT                                |
| 34        | 45          | GCAGGT <b>CAG</b> AGCATAG <b>GAGA</b> ACCGGAT <b>ATT</b> CAAAGGC <b>CA</b> AGGATT                                         |
| 35        | 44          | ACTGGT <b>AC</b> GGAGA <b>TG</b> TTAATA <b>AAACGA</b> ATTCAT <b>CAT</b> CGCAAATG                                          |
| 36        | 44          | CGCAGT <b>CC</b> GCAGA <b>CT</b> TGAGATGG <b>TTTAA</b> T <b>CAGAA</b> TTGCCATCT                                           |
| 37        | 42          | CTTTCC <b>AA</b> CCAGT <b>AAG</b> CAAG <b>CCAAT</b> AG <b>CC</b> CGCC <b>ACT</b> TGCGAA                                   |
| 38        | 42          | ATCATA <b>CC</b> GGTGT <b>CAC</b> GACGATA <b>AAAA</b> CTTGCC <b>AGC</b> ACCATT                                            |
| 39        | 42          | AGTACA <b>AA</b> TAAGT <b>TTTT</b> TCATTTGGGG <b>CA</b> TACAT <b>TG</b> TTGAGA                                            |
| 40        | 42          | GAAGAA <b>AA</b> TACCA <b>CAG</b> TTT <b>GACC</b> ATT <b>AGG</b> CGAG <b>CTG</b> GAGTGT                                   |
| 41        | 42          | TTTAGG <b>AA</b> ATCTA <b>CT</b> TGTAT <b>CAT</b> CG <b>CTT</b> GATAC <b>AG</b> AAAAGG                                    |
| 42        | 42          | GGGAGT <b>TATT</b> ACC <b>CTGT</b> ACAGACC <b>AGG</b> CCGATT <b>GGA</b> CCAGAG                                            |
| 43        | 42          | TAAAGT <b>AAG</b> GCA <b>AGT</b> TGAGGGAGGG <b>AA</b> GCAGTAG <b>AG</b> GGGGT                                             |
| 44        | 42          | CCCTCG <b>TAA</b> ATGT <b>TAG</b> CCAG <b>CAAA</b> TCAGTAAAT <b>AC</b> CAATAA                                             |
| 45        | 42          | AATAGT <b>ATT</b> ACCA <b>GTG</b> GAAGTT <b>CATT</b> CTTAAC <b>ATT</b> TGACGG                                             |
| 46        | 42          | AACGAG <b>GT</b> CTGA <b>TACC</b> AGAG <b>CCACC</b> CTTAGCG <b>TAC</b> GAGAA                                              |

|    |    |                                             |
|----|----|---------------------------------------------|
| 47 | 42 | GTAGTAAAATCAATCATAGCCCCTTACGGAACCTGGAAAG    |
| 48 | 42 | TGACCATTATTGGGCGGTCAATCATAAGGGCCAGAAGCCTCCC |
| 49 | 42 | TGTAGCGTTTTTTCATCGGCACGCCACCCTTTTTTTCAGAA   |
| 50 | 42 | AGGTGTAGAAACGCGGTTTACCAGCGCGATAGCAAAGCTTCA  |
| 51 | 42 | TCGAGGTTAATTCGGCACGTAATCAGTTTCATATAAAGACA   |
| 52 | 42 | AGGATTAAACCACCCTTGATATTCACATGAACGGAATCAA    |
| 53 | 41 | CGTCACTTTATGAAACCATCAAAGACATTTTTTTAAAGGGC   |
| 54 | 41 | GACATGCAAGGCTTGCAAAAGAAGTCAAAATAATGCAAC     |
| 55 | 40 | GTCATAACCACTACAGGTAGAAAGACTAACGGGAAACAA     |
| 56 | 40 | TTTCATAATCATATGCTTTAAACAGTTTCAACTAGCCGG     |
| 57 | 39 | ACCACCCTCTCAGAAAGGAACAACTTTCAGCTTGTCGT      |
| 58 | 39 | TAATAATTTGCTAAGTAAATGAATTTTCAACGTAACACT     |
| 59 | 36 | AAGCGAATTATCAGACTCAGGAGGTTTTGTACCGC         |
| 60 | 36 | CGTAACACGCTGAGTTGCTCAGTACTTTGGCGGAT         |
| 61 | 29 | TGACAGAAACAGTTAGTATTAATCAGCAG               |
| 62 | 29 | ATGTACATACATACATCAGAACCGTTGAA               |

---

**Table S15. Staple sequences for the MV tetrahedron of 84-bp edge length.** The sequence is represented by colors; unpaired nucleotides with blue, and crossovers with orange, the 14-nt seed dsDNA domain with green, and the 4-nt dsDNA domain with red.

| Staple ID | Length (bp) | Staple sequences                                                                                |
|-----------|-------------|-------------------------------------------------------------------------------------------------|
| 1         | 60          | CATCTTT <b>CG</b> TAGA <b>ACCTTATTACGCAGT</b> GTAGCG <b>CCTAAAGTTTTGT</b> <b>CGA</b> TTTATACCAA |
| 2         | 59          | AAACCAAT <b>CACACCACCTATAAGTATAGCCCAACAGGTT</b> GATAAGAGGTCAT <b>TTTTGCG</b>                    |
| 3         | 59          | ACCATTAGC <b>AGTTTGC</b> <b>CAGACGTTAGTAAATTTCTTAA</b> CAACAACCATCG <b>TT</b> CACGCA            |
| 4         | 59          | GCAGAT <b>GC</b> ATTAG <b>CTCAAATGCTTTAAATAGCA</b> <b>AAGAGCCACCACCGGA</b> GTTACCAGAA           |
| 5         | 57          | GGGAGG <b>TACCAACGAAAAGGAATTACGAA</b> CGTT <b>GGC</b> TGGAAGTTTCAT <b>TT</b> CATATAA            |
| 6         | 57          | GCCCAAT <b>TTGTTAACTGACTATTATAGTC</b> CACCC <b>TACCACCCTCAGATTT</b> CGCCACC                     |
| 7         | 56          | TGGCAT <b>CG</b> ATTCC <b>CTCATTGTGAATTA</b> CCGGATATA <b>AAGACAGCATCGTT</b> ACGAGG             |
| 8         | 56          | GAAGCC <b>CCAAAGTCAATGTTTAGACTGG</b> AGGCG <b>CAT</b> AATGCCACTACG <b>TT</b> GGCACC             |
| 9         | 56          | AGTCCT <b>GCTTAGAGATATCGCGTTTTAA</b> AGCC <b>GCCAATCCAAATATTT</b> AAACGA                        |
| 10        | 55          | TTGCAC <b>CGATAAAAACCAAAGTGTAC</b> <b>AACAGAGGCTTTGAGAGCGCCAG</b> CCCAAT                        |
| 11        | 55          | CTCATC <b>GA</b> ACCGC <b>CCCTCATTTCAGGG</b> ACAGTT <b>CAAAAACAGGGAAGCA</b> GCCGA               |
| 12        | 54          | TTTT <b>TAGCAAGC</b> <b>TTTTTTT</b> AAATCAGATATAG <b>ATTTATCA</b> AAGACTTCTCATCA                |
| 13        | 51          | TTTTAAGAT <b>TCATTATACCAGTCAGGGGCATAGTAAGAGCAACT</b> TAACCCTC                                   |
| 14        | 51          | AATACTG <b>CTTCATAAATATTCATTGCATGTACCGTAACACTGT</b> TTACCAGT                                    |
| 15        | 50          | GTTTAC <b>CG</b> ACTAA <b>AAGGACAGATGAACGT</b> AGCGAG <b>AATTGAGTTGCTATT</b>                    |
| 16        | 50          | ACAAAGAACAAGCA <b>ATAACATAGAAAACGAGAATGC</b> CACCA <b>CTCCCTCA</b>                              |
| 17        | 49          | GTTTAC <b>CGCTGGCTGACCTTCATTTAATCTTGACAAGAA</b> CC <b>TTATGCGA</b>                              |
| 18        | 49          | ACAAACT <b>GAAATCCGCGACCTGCTTTACTTAGCCGGAACGA</b> TAGCGTCC                                      |
| 19        | 49          | GTATGGGAT <b>AAACAAC</b> TTT <b>CAACATAAAGGAATTGCGAAT</b> TTTTTTTCAC                            |
| 20        | 49          | GTTGAA <b>ATAATTGTATCGGTTTAT</b> TGCTTT <b>CGAGGTGAATGA</b> AATTTTCT                            |
| 21        | 49          | GTATCAC <b>CTGGAGGTTTAGTACCGCAGAAGCAAAGCGGAT</b> AAAAAGAT                                       |
| 22        | 49          | TAAGAG <b>GTT</b> CGAG <b>CTCAAAGCGTACCGGAAGCAAAC</b> TC <b>CG</b> GAATAGGT                     |
| 23        | 48          | CAGT <b>TA</b> ATTCTAC <b>TTTTTTTTAATAGTAGTAGCAAC</b> CGGTG <b>TGA</b> AGAAA                    |
| 24        | 47          | GTAG <b>CAC</b> ATTCA <b>TTTTTTTACCGATTGAGGGAGAGCAGCGT</b> CATTAC                               |
| 25        | 47          | ATCA <b>CG</b> AAACGCA <b>TTTTTTTATAATAACGGAATTAGCGT</b> CTGTAGC                                |
| 26        | 47          | GAT <b>GGA</b> ACAAGAT <b>TTTTTTTAAATAATATCCACTCCTT</b> TCAGGATT                                |
| 27        | 47          | TAAC <b>CC</b> ATTTGG <b>TTTTTTTGAATTAGAGCCAGCGACAAT</b> GACAGCTT                               |
| 28        | 45          | GCGCGAAAC <b>ATAACGATGTTTTTCATCGGCATTAAGAC</b> TAATACAT                                         |
| 29        | 45          | TATTAAGAG <b>GGGCGGATAGGAGGTTGAGGCAATAAA</b> CTGAATT                                            |
| 30        | 44          | GGAAACCGAG <b>CGGGAACCGCCCAATAGGAACCAATCCC</b> ACGCGGA                                          |
| 31        | 44          | ACCATT <b>AAGCTATAATTAAAGGTGAATTT</b> TGCAG <b>GT</b> AAGGCTTG                                  |
| 32        | 44          | GAATTA <b>ATTGAACACCCTGAATTTTTAAGTTTTTTT</b> AAAAGTAA                                           |
| 33        | 44          | TGCCAG <b>TGAACGC</b> <b>GGCAAAGACCTGTTATAATGCTTATTACAG</b>                                     |
| 34        | 43          | CGGAATA <b>AAAATACGGACGGTCAATCATAA</b> TAGTAA <b>GAGGGT</b>                                     |
| 35        | 42          | CAGAA <b>CTTCGCAAATTAATAAGTTTT</b> AAAAAAAAAGGAAACAC                                            |
| 36        | 42          | CGGGG <b>T</b> CGATTGGCCATCGATAGCAG <b>CCGGAGTGAGGATTAG</b>                                     |
| 37        | 42          | GTTAAT <b>GCCAGTAAGATATTCACAAACAG</b> GT <b>CAGATT</b> TGCTC                                    |
| 38        | 42          | GACGGA <b>ATTTTGC</b> <b>GCAAAGCTGCTCAT</b> TGCTT <b>GAGT</b> AGTTTG                            |
| 39        | 42          | ATCATA <b>CTTTTAA</b> <b>AAAACGAACTAACGGCATTCAAC</b> CTAATT                                     |
| 40        | 42          | ACATA <b>ATACACTAACGGAGATTTGTATAGACAGCC</b> ATAGCC                                              |
| 41        | 42          | ACCAGTGTAGCAA <b>AG</b> ACCCCGAGCGAAGTTGCGC <b>CA</b> AAATC                                     |
| 42        | 42          | TACCGT <b>TCCCCTGTCTCAAGAGAAGGATTAGAA</b> TAAACA                                                |
| 43        | 42          | TTTACGATGGAAAG <b>CT</b> ATTATTCTGAAC <b>TTAATTGT</b> CCTAA                                     |
| 44        | 42          | CCCTT <b>ATACCCAAACATATAAAAGAAA</b> AAACG <b>AT</b> GATAAA                                      |
| 45        | 42          | CCTGTT <b>TGATACATGAGTAGTAAAT</b> TGGCAGTGA <b>AG</b> AGTTAA                                    |
| 46        | 42          | AGGCC <b>G</b> ATTATT <b>CTTTTCATTGGGGCG</b> TAGATT <b>AT</b> TGGTTT                            |

|    |    |                                            |
|----|----|--------------------------------------------|
| 47 | 42 | CCAAATCACTTTAAATTCTGCGAACGAGCGAGCTAATATT   |
| 48 | 42 | AATTTCAAACGTAAGGATCGTACCCTCGGAAGGTGAAAAGG  |
| 49 | 42 | ATTCCAATCGCCAAAGAGGCAAAGAAGGTGGCAAGAACTG   |
| 50 | 42 | ATTCTAATACAAAATTTAGGAATACCAACAACATGTAGCT   |
| 51 | 42 | CAACATGAGGCAAAGGGCTTTTAGCGATCCAGAGCTAATGC  |
| 52 | 42 | AATCTACTAACGCCTAACGAGCGTCTACCTCCCCAATAA    |
| 53 | 42 | AGATACAGTTAATATATGCAACTAAAGTTAACATGACTTGC  |
| 54 | 42 | AGTACCCTGAGAACCTATTTGGAACCGCAGTCTCTCATT    |
| 55 | 42 | GCATGATTTTCGGTCCTCATAGTTAGCGAAGTACAAACACT  |
| 56 | 42 | AATAAGACCACAAAGAGCTTTTGCAAAATTGAAAGGACTTTT |
| 57 | 42 | ACCAACTGAAGTTATCAGAGAGATAACGCAAGAATCATATG  |
| 58 | 42 | TCATGAGAGAAAACAATGAAATAGCACGCTAATTGCCAGA   |
| 59 | 42 | AATTGAGATAGCTATTGTGACAATCAATGAAGTTTCGAACTG |
| 60 | 42 | GGGGGTAAAGGAAACCATTAAACGGGTAGTTTATTTCTTACC |
| 61 | 42 | TTCCTTACAGAGCCAGAACCGCCACCCCTTTACCCGTCAAA  |
| 62 | 42 | ATCAGGTTCAGAAAGAACCGCCACCCCTTATTCTTACC     |
| 63 | 42 | AATGAAAGGAATCAAAGAACGGGTATTACACCCTCCGCCACC |
| 64 | 42 | GAGCCGCAACCAAGTTATTTTATCGTAAATAGCAGATCAAAA |
| 65 | 42 | CTCAGAGACCATAACCTTTACAGAGAGAGCCGTTTTACCGCA |
| 66 | 40 | CAATGAAACCTTGCCTCATACATGGCTGCCCGTTAGAAAAG  |
| 67 | 40 | AGTGTACTGGGTACCCGACTTGAGCGATATATCCAAAAG    |
| 68 | 40 | CCCTGACGAGCTTCGGTCGCTGAGGCAACCCGTCAATAA    |
| 69 | 40 | GTAGAAAGATAACTTAATTGCTGAATATCAACAATCCGGT   |
| 70 | 40 | AAGATTAGTTAAAGACAAAAGGGCGAACGGCTGACCAGG    |
| 71 | 39 | AAAGCCACATTGACAAGTGCCGTCGAGAACACATGAAAG    |
| 72 | 39 | AGAGAGTGGGTTGAAGAGCCGCCAGGAAGCATGTAG       |
| 73 | 39 | GATACCCTCTTTCCTTTAGCGTCAGACTATAGCACCATT    |
| 74 | 36 | CGCATAGAGACGACCAGCTACAATTTTATCCTGA         |
| 75 | 36 | TTGTGTCAACACGCTGCCATCTTTCTTTAATCAAA        |
| 76 | 36 | GAACAAAGTTTCAGACCGTAATCAGTTTCGACAGA        |
| 77 | 35 | GAGCCTTATCTCCAAAGGGTTCAGTGTTCGAGT          |
| 78 | 34 | GTTGAGTAAACAGCCATATTAAGGCTATAGATA          |
| 79 | 28 | ATCTTTTGAAGCTTTTTTTCTTAAATC                |
| 80 | 28 | ATCAAAGGCCGGATTTTTTTAACGTCAC               |
| 81 | 27 | AACAAGTTTGTATTTTTTTGATACAGG                |
| 82 | 26 | AGAACATAATCGGTTTTTTCTGTCT                  |
| 83 | 25 | AACCTCGCAAAGTTTTTTACACCA                   |

---

**Table S16. Staple sequences for the MV octahedron of 84-bp edge length.** The sequence is represented by colors; unpaired nucleotides with blue, and crossovers with orange, the 14-nt seed dsDNA domain with green, and the 4-nt dsDNA domain with red.

| Staple ID | Length (bp) | Staple sequences                                              |
|-----------|-------------|---------------------------------------------------------------|
| 1         | 60          | CCGTGTTTTTTTTGATAAATAAGTTACTAGAAAATTTTTTTTAGCCTGTTTAGTGTA     |
| 2         | 60          | ATAGCATTTTTTTTGCCTTTACAGATCAAGAAAACTTTTTTTTAAAATTAATTAAAGCTTA |
| 3         | 59          | AGACTGCACCATTACCATTACAGCAAATGAACGGTTTGACCAGGCGCATAGACCGTCA    |
| 4         | 59          | GCCTAACACCGGAATCATAAGCGTTAAACCGAGTATTTCTGTCCATCACGCTAATGGT    |
| 5         | 59          | TTCTTAAGAAGAATCAGTATTAACACCTGGTCAGCGCTTTTGCGGGATACCCGATAGTT   |
| 6         | 59          | AATAAGAAAATTCATATGGTGTAAAAAGCCCGAAAATTTAAATATCGCGTTTTAGGGTTA  |
| 7         | 59          | GGGGTACAACCTAAATCCTTTGCCGACAGATGAGGCCTCAGGAAGATCCTTAGACTGG    |
| 8         | 58          | CCGACTTTATCTAAGTCGCTGATTTTCAAGGAGTTGACAACATTTTTTTACCATCGCCC   |
| 9         | 58          | GATTAATTTTTTTTGGACGCTGAGACGCCAACATGTTTTTTTTAATTTAGGCATGAAA    |
| 10        | 58          | TGCTGATTTTTTTTGCAAATCCACAAATATATTTTTTTTTTTAGTTAATTTACCGA      |
| 11        | 58          | TTAACAAGAGTCAAACCCGCTTTTCCGTGGTAGCCAGCTTTTTTTTTTTCATCAAC      |
| 12        | 57          | TCATCAACGTATTAAACGAAAGTTAAGAATAAGAAGTTTTTTTTTTGCCAGAG         |
| 13        | 57          | GTACCGCGCCTGTTTCGTGCCAGTTTAAATGAATAGCAAGCGTTTTTTTGTCCACGC     |
| 14        | 57          | TTTTGCAAACTAAAATTTAGAAGTATTAGGGCGACATAACAAAGCTTTATTCAGTG      |
| 15        | 57          | TTATCAGCTAATATCTACCGAACGAACCATGAAACCAATCAAGTTTTTTTAGCGTC      |
| 16        | 57          | AACAAGAGCTGCGCAGTTATATAACTATATATCATACATAAAGTGTTTCCGGGGT       |
| 17        | 57          | ATCAACAGAGGCGCTCAAACATAAATTTGCTGGTGTCTTTCGTTTTTTAGGTGAAT      |
| 18        | 57          | TCCTCATTAAATGTACCCCTGAATCTTACCATATAGAAGAGCCGCCATTTACCACCAC    |
| 19        | 57          | TGAGCGCTGCTTTGTATGCAACTTTTCGGTGTCTGGCGCGATTTTTTTGCTGAAAA      |
| 20        | 55          | CCCGGGTTTCGAGCCAGTAATTTTTTTGGCCACCCTCAGAACATGATACCCAGTGA      |
| 21        | 55          | GAGGAAGAAATAAAGAAATTAATAAGGCTTGCCCTGACGATAAGAGCAACATTA        |
| 22        | 55          | TCGGGAGATAAAGCTTTAATCATTTATTACCTTGATTTAGGTTTTTTAATACC         |
| 23        | 55          | GTTGGTTCGATCGTTAACCTCCGGCTTTCTTACCACACAACATACGAGGTTGAG        |
| 24        | 55          | ACTTTTATCGCAAAAGCGCCTTTATTTCAGGCACTATTTTTTTAAAGAAC            |
| 25        | 55          | CAGTTGAATGCGATATTACGCAGTATGTTATCTTAATCAAAATCTTTAACCAGAG       |
| 26        | 55          | TAAACAAGCCTAATGATAGCAAGTTAGGAACCCAGCCAGATTTTTTTATGGAA         |
| 27        | 55          | GTCGAAACCCAGCAATAGATAATACATGAGGGATATTCAATACCCAAAAC            |
| 28        | 55          | GAACCTAATACTTCTGCCAGTTTTGACGACGAATACTGCGTTTTTTGAATCGT         |
| 29        | 53          | GCTGGCAAGTGTTTTTTTAGCGGTCACGCTTGAGGCCATAAAGAATATAGAAA         |
| 30        | 52          | TAAAGCACTATTTTTTTAATCGGAACCCTACAACGGCTGACCTAAAAGCAT           |
| 31        | 51          | ACGTAGTTTTTTTTAAAATACATAACAACAATAACGGTTTTTTTTATTCCGC          |
| 32        | 51          | ACGAGCTTTTTTTTGTCTTCCAGACATGTTAGCTATTTTTTTATGCAG              |
| 33        | 51          | GAAGATTTTTTTTTAAAACAGAGGTGTTGAAAGGAATTTTTTTTTTGAGGA           |
| 34        | 51          | CAAACAATTTTTTTTATTTCGACAACATAAATCCTGATTTTTTTTTGTTTG           |
| 35        | 50          | GCCCGGAGTGCCTCAAGGCAAGATCATTTTTTATTTTTTTACCAATAG              |
| 36        | 50          | AAATAAGAGAATGACTCCAATTTAATGGAACATATTAATTAGGTCA                |
| 37        | 50          | CAAAATCGCGACCTGAACCGAAGGTAATATTGACAGCCGTGATTATA               |
| 38        | 50          | GGCATAAGAAACAATTATTTGTCACAATGCGTAGGATTTAGTTGATTAA             |
| 39        | 50          | AAATGTACTACGTGAGTAATGCTAATTTTAAAAGTTTATCATCCAGCCAG            |
| 40        | 50          | CAGAGCGGAATCATTACCGCGTTTTTAGAGCGGGATTTTTCAGGAGGCTGAC          |
| 41        | 50          | TTACAGTGTCTTTACCGCCAACCGGAGGCGTTTTGCTATTTAGTACAA              |
| 42        | 50          | GCTTTTGCGCCACCCAAATAAGAAACGATAAGAGATTTTCTTTTAGGATC            |
| 43        | 50          | CCACCAAATAAAGAGCAAAAGAATTAAGAGAAGTTGATTAGCGTTCT               |
| 44        | 50          | TGTTGTCGCCAGGGTCAATTCAGTATAAAGCCAACACCTTTGCGGGC               |
| 45        | 50          | TTGATAGTGGCGAGAAATAAACACAGTGCCACGCTGATCAAACTCAGCA             |



46 48 GCGTAAGAA**T**GATAGC**C**ATTGCAACAGGAA**C**AATCG**T**CAGTCACACG  
47 47 AGCTTGCATG**TTTTTTT**CCTGCAGG**T**CGACT**T**AGC**A**GGAGTGTAC  
48 47 TAGCGAT**C**ATT**A**ACTTTAATTG**TTTTTT**GATAAGAGG**T**CATGATGA  
49 47 TCAGAAGCA**TTTTTTT**AGCGGATTGCAT**CAAAA**T**G**AACACTATCA  
50 47 TCATAAGGG**TTTTTTT**ACCGA**A**CTGACCA**A**CTTT**G**TT**C**ACGTTGA  
51 46 AACAAA**C**AGAGAA**T**ATCACCG**TTT**GGAGG**TTT**AGT**A**CT**T**TAACG  
52 46 TTGAA**A**T**C**ATCT**T**CTACAGAGG**TTT**GGACT**AA**AGACT**TT**C**G**AGAAA  
53 46 TCAAAA**A**AGAGG**C**AT**T**ACCGAG**CTTT**CGT**A**AT**C**ATGG**T**CGCCATAT  
54 46 AAATCTCCA**TTTTTTT**AAAAAGG**CT**CAA**A**AGCGAC**A**GATCGATA  
55 46 TAACCCTCG**TTTTTTT**TACCAGACG**A**CGAT**A**TCAAC**G**TCAACC  
56 46 AATCAA**TTTTTTT**AGCCGAGAT**AG**CCGAA**G**TGCGTTA  
57 45 TGTAATAAG**TTTTTTT**TTAACGGG**T**CA**T**AGG**T**GAACATAA  
58 45 TAAACA**TTTTTTT**CAACAG**TTT**CAG**CT**TT**C**AT**AC**CGAAGC  
59 45 TTGAGGCAG**TTTTTTT**CAGACG**ATT**GG**C**ACCCT**C**AGGCTTAT  
60 45 GGACG**T**AACGG**A**AGGA**ATT**GCGA**ATA**ACGGC**ATT**GTTACCAGAA  
61 44 ACTACA**ATT**AGCG**TT**TAGT**AA**TGA**ATT**CTCAG**A**GCTCCCGACT  
62 44 CGTTGG**T**ATGCT**T**CA**AAAA**T**C**AGG**T**CAGCGAA**CA**ATCAATAT  
63 44 CTTTCC**G**ACCG**T**CC**CAAA**T**CA**AG**TTT**CCATT**AC**ATTATCAT  
64 44 GCGAAA**G**CTTGAC**GG**GAAGAA**AG**CGAA**AA**GCAAT**AG**CAGCAAAT  
65 43 ACATT**CA**ATTT**CA**AT**GG**CAAC**ATA**AA**C**AGT**ACT**CATTCC  
66 43 AGCGCAG**TTTT**CAG**GT**TGCCAG**TT**CA**AA**CCAGAC**GC**GCGCGG  
67 42 GATTAG**TA**AGGAA**GG**GAAG**CC**GG**CG**ACGT**C**AC**CC**CTCAAT  
68 42 GAAGCA**AC**ATA**AA**T**AA**ACAG**TT**CAG**AAA**ATGGG**AT**AATTTT  
69 42 TGACCG**T**ACT**TC**CG**CT**TGG**CT**TC**CT**GA**AC**AA**CG**AAAA**CA**  
70 42 CCCT**CA**AGTAGAT**G**CT**GT**AA**AT**CG**T**CG**CG**TACAT**AC**AGACCG  
71 42 GCAAT**AAAA**ATCTACGAAAGAGG**ACA**GAT**C**ACCAGTGGAA**AC**  
72 42 GCCT**TA**AGCATTCCACTGAGACT**CT**CGAG**TT**AAGCTTT**G**AA  
73 42 TAGT**CT**ATGGAAATATCGTTAGA**AT**CA**TTT**TCATCGGGCTAT  
74 42 AAAGGTGCACT**AA**CAAGTACA**CC**GATATAT**TC**GAATATCT  
75 42 CTTAAT**TA**AAAT**CA**AGCCAGCTGGTGAGCGAG**TA**CA**TA**GTGA  
76 42 ATTTTGA**ATT**ACGCCCGCAGAAAAGGGAC**ATT**ACAGACA**AT**  
77 42 AAGGAA**CC**CTTAT**TG**TAAGCAG**AT**AG**CC**AA**AGA**ACCAGTCA  
78 42 ATAAAT**CC**TTAG**CA**ATT**AC**TGAG**CA**AG**A**AGCGCAAGTATA  
79 42 AAAATA**CA**CCAT**CA**AT**C**AGGG**CG**ATGG**CC**GCACTCATATTCC  
80 42 CTTTAAACATTGGC**AT**AGAACC**TT**CTTAATCAG**T**AA**GG**AGC  
81 42 TTTAG**A**GACAG**CA**T**G**CT**GA**AC**CT**CA**AA**TAGAG**CC**ACTTCTTT  
82 42 ACGAA**T**GGGAAG**AA**TA**AC**GGA**AT**AC**CC**GA**ACA**ATT**CG**GT**C**  
83 42 ATAG**CC**CA**ACT**AA**CA**AC**ATT**ATT**AC**AG**C**ATTAT**ACT**GGC**AT**  
84 42 CCTTT**T**ACTC**CT**TT**TA**AGA**ACT**GG**CT**GTAGAA**AG**AATAGA  
85 42 GATT**AA**GAAGAAA**AG**CG**TT**TGCC**AT**CGAG**GT**AG**ATT**CAT  
86 42 GATAC**A**CGAG**T**AA**TTTT**CAG**TTT**AA**ATA**AG**TC**AGA**AC**G  
87 42 ACCAC**G**CGT**C**AG**AT**CC**CA**ATT**CT**GCG**AT**TCG**CA**AA**TT**ACGA  
88 42 AGTAG**T**AAAAGG**AA**TGG**T**CA**ATA**AC**CT**AGTTG**ATT**GAATAT  
89 42 ATATA**CG**TT**T**AG**C**AG**ATA**CA**AC**CG**CA**ATTGG**GC**AAAGAC  
90 42 ACAG**TA**AAGAA**AC**G**CT**TGAGATGG**TTT**ACTAAT**G**CTATATTT  
91 42 ATTTAT**CG**AGA**AT**CA**T**AG**CT**G**TTT**CT**G**AAACG**CA**AAAGGG  
92 42 AAACAG**GA**AAGAA**G**ATTT**TT**GCGG**AT**G**G**ATACAG**GG**AGTAAC  
93 42 AGTG**CC**CTTGATA**T**ATTAG**AC**GGG**AG**AAT**C**ATT**TC**TTAATT  
94 42 CGA**ATT**AT**T**AACT**GT**G**CC**GT**CG**AGAG**GG**TATA**AAA**CATCCA  
95 42 GCTGA**AT**AGC**ATT**ACAG**TT**AAT**G**CCCC**G**GATA**AGA**AC**ACC**  
96 42 ACCAG**G**CTGC**CTA**CT**ACT**AATAGTAG**T**A**TA**AT**G**CG**C**AGAGG  
97 42 TGAACA**AAA**ATCG**CT**G**T**AG**CT**CA**AC**AT**G**AT**CA**AT**TT**TCGGAA  
98 42 GATGT**G**CTATT**ACT**AG**GT**CTGAGAG**AC**G**CT**CA**ACT**TGTTAT  
99 42 **G**AA**AT**TTTT**TT**TCAT**G**AAAG**T**AT**T**AAGAG**GC**AT**G**GGATTT**GC**

100 42 CTCATAGCGCCTGTAATCAAGATTAGTTAGCGAACCCGCCAC  
101 42 CCTCAGACCAGACGAACGATCTAAAGTTCGTCACCTGCACCC  
102 42 TTAGGAGAATTATCGCTGGCTGACCTTCCGAGGCGAGATTTG  
103 42 GACGGGCGGGTGGTATATAAAGTACCGACCCAATCCTCAGAA  
104 42 TATTTATCAAAAGCGTATTGGGCGCCAAACAGCTATACATG  
105 42 CCGCCA CAAGCGT CGATTGCCCTTACCCTGGTTTGTAAAGTA  
106 42 GGAGAGGGCCTGGCTTTACCGTTCCAGTCTCAGAGCCATAT  
107 42 ATTCTGTATAAACAGCCACCACCCTCATCTCTGAACCTGAGA  
108 42 CTCTTCGTGCAAGGGTCACGACGTTGTATGTGAAAAAGTAGGG  
109 42 GCGAAAAGCACCGCAGAAGGAGCGGAATTGAGTAAACGGGT  
110 42 TATCATCCGAAACAACTAATAGATTAGGGAAATTGTAATCT  
111 42 CACCCGCGAGAAGTAATAATCGGCTGTCAATATCCATTGCGT  
112 42 AAAAAATATTTCTTACGCCAGAATCCTCGCGCTGGTGGTT  
113 42 TGCCTCGTTTTGATAATGCGCCGCTACAGGAACGGATCATT  
114 42 TTAGACAGGGCGCGCAGGGCGAAAATCCTACTGCCGAACAAG  
115 42 CAAGAA CAAGTCC TGCTTCCAGTCGGGGCCCCAGTACTATG  
116 42 GAGCTTTTTTACGTATAACGTGCTTTCCCTTGACAGGAGG  
117 42 GCGAACTACGTGGCTGGCCAACAGAGAGATTCACTGAAAT  
118 42 CCAAGCGGCCTGATTTACTTAGCCGGAATCAAGAAATTCATT  
119 41 CATAAAGTGCATCTGAATAATGATAACCTTGCTTGCGCAT  
120 41 GGTGGCTTTTAA AATACCAAGTTACAAGTCAGAGCTCAGT  
121 41 TGGTTTAAACCTGTATCAACAATAGATGGTATTAGGGATT  
122 41 GAACGCAGAGTACCAATTTCAATTTGAAAATCCTTGCGGAT  
123 41 GTGGA CACCAGG CGACAAAGAAAAAGAAACCACCTTCTGGT  
124 40 CTGATTAATATCAGAGATTTTTTTTGATAACCCAGAAAC  
125 40 AACGCACTCATCGAGAAATTTTTTTCAAGCAAGCCGCCA  
126 40 ATGTGAGTGAGAAATTCGAGCTTCAATTACCTTGAATCC  
127 40 TTTGCGGAACC GTTCATGAGGAAGTTTGGGGTCAAAGG  
128 40 TGCGGGAGGTCCCGGAACCGCTCCTTCTGTAGACAGCC  
129 40 CCGGTATATTTTATGTAACACTGAGTTTTTAACAAATAAA  
130 40 TACGAGCATGAATGAGTGAGCTAACTCGGCAAACCACCA  
131 40 GCAGCACTTAAAAAAGAACAATATTACCTTTTGTATCGGT  
132 40 GAAAAATCTATTAAATTAACCGTTGTGGAGCGCCCCGA  
133 40 TACAAATAGGTTGACTGTTGGGAAGGGAATCCAGTTTGG  
134 40 GATTGAGTTGAGGACACTCATCTTTGACTCAGCGAGAGGC  
135 39 GGAAACCGAAGTAGCGGTTTTCAATTTTAATAAAA  
136 39 ACCAGTAATCATACATTTTGACGCTAACGCTTTAATGC  
137 39 GGATTATGCCAGCCCTAAAACATCGCCACGGACCTGAAA  
138 38 AGGTGAGCCATTTGGTTTTTTTGAATTAGAGCGCAAG  
139 38 GATTCATATCAAAAATTTTTTTTATTTGCACTTACC  
140 37 CCAATCGTTTTTATAATCAGGCGCGTAATCCCTTATA  
141 37 CACCTTCGGAACGAGGGTAGAAGGGAAGCGCTAGGGC  
142 34 AGCTACATCTAAGACCCTCAGAGCCACCTTGATA  
143 34 CAATATCGCCTGCATCACTTGCTGAGTACAGC  
144 34 TGATTATACGTTACTACTCGAAGGCATAGTA  
145 34 CCCTTAGTTACCTCAGGTGAGGATTAGCATCAA  
146 31 AATGAAATTTTTTTATAGCAATAGCTAGCAA  
147 31 ATAGCAATTTTTTTAGCAAATCAGAACGCTA  
148 31 GCCGGATTTTTTTAACGTCACCAACAGCA  
149 31 AGCGCCTTTTTTTAAAGACAAAAGACTTTA  
150 25 GCCGGAATCCAACGTCGAGGTGCCG  
151 25 CGTAACCTATTCTACTATTATAG  
152 24 GCGCCGACAATAAAGGCTTGCAA  
153 24 ATAGCGTCCACAGTATCTGGCAAT

|     |    |                          |
|-----|----|--------------------------|
| 154 | 23 | CCGAAATCACATTAA TCCTAATT |
| 155 | 21 | TCATTTGGGAAGTTT TTTACA   |
| 156 | 21 | CCTATTAGGGTTT TGGTAAT    |
| 157 | 21 | GAGTTGCCGCCAAACGACAA     |
| 158 | 21 | GTTGCTTCGATTAAAACCAA     |
| 159 | 21 | ACGCATAAGGCAGACGGTCAA    |
| 160 | 21 | TGACAA GCTCCATGA AATTGT  |
| 161 | 21 | ATTAAATGC GGCCAGTGCCA    |
| 162 | 21 | CCGCTCATTCCACGATTAA      |

---

**Table S17. M13 scaffold sequences.**

**M13 scaffold sequence**

(1-1000)

AATGCTACTACTATTAGTAGAATTGATGCCACCTTTTCAGCTCGCGCCCAAAATGAAAATATAGCTAAACAGGTTATTGACCATTTGCGAAATGTATCTA  
ATGGTCAAACATAAATCTACTCGTTTCGACAGAAATGGGAATCAACTGTTATATGGAATGAAACTTCCAGACACCGTACTTTAGTTGCATATTTAAAACATGT  
TGAGCTACAGCATTATATTCAGCAATTAAGCTTAAGCCATCCGCAAAAATGACCTCTTATCAAAAGGAGCAATTAAGGTACTCTCTAATCTCGACCTG  
TTGGAGTTTGCTTCGGTCTGGTTTCGCTTTGAAGCTCGAATTAACACGCGATATTGAAGTCTTTTCGGGCTTCTCTTAATCTTTTTGATGCAATCCGCT  
TTGCTTCTGACTATAATAGTCAGGGTAAAGACCTGATTTTTGATTTATGGTCATTCTCGTTTTCTGAACTGTTAAAGCATTTGAGGGGATTCAATGAA  
TATTTATGACGATTTCCGAGTATTGGACGCTATCCAGTCTAAACATTTTACTATTACCCCTCTGGCAAACCTCTTTTGCAAAAAGCCTCTCGCTATTTT  
GGTTTTATCGTCTGGTAAACGAGGGTTATGATAGTGTGCTCTTACTATGCCTCGTAATTCCTTTTGGCGTTATGATCTGCATTAGTTGAATGTG  
GTATTCTAAATCTCAACTGATGAATCTTTCTACCTGTAATAATGTTGTTCCGTTAGTTCTGTTTTATTAACGTAGATTTTTCTTCCCAACGCTCTGACTG  
GTATAATGAGCCAGTTCTTAAATCGCATAAAGTAATTCACAATGATTAAGTTGAAATTAACCATCTCAAGCCAAATTTACTACTCGTTCTGGTGT  
CTCGTCAGGGCAAGCCTTATCTACTGAATGAGCAGCTTTGTACGTTGATTGGGTAATGAATATCCGGTCTTGTCAAGATTACTCTGATGAAGTCA

(1001 - 2000)

GCCAGCCTATGCGCCTGGTCTGTACACCGTTCATCTGTCTCTTTCAAAGTTGGTCAGTTCGGTTCCTTATGATTGACCGTCTGCGCCTCGTTCCGGCT  
AAGTAACATGGAGCAGGTCGCGGATTTTCGACACAATTTATCAGGCGATGATACAAATCTCCGTTGACTTTGTTTCGCGCTTGGTATAATCGCTGGGGT  
CAAAGATGAGTGTATTTAGTGTATTTTGCCTCTTTTCGTTTTAGTTGGTGCCTTCGTAGTGGCATTACGTATTTTACCCTTTAATGGAACTTCTCTC  
ATGAAAAAGTCTTTAGTCTCAAAGCCTCTGTAGCGTGTACCTCGTCCGATGCTGTCTTTTCGCTGCTGAGGGTGACGATCCCGCAAAAAGCGGCT  
TTAACTCCCTCAAGCCTCAGCGACCGAATATATCGTTTATGCGTGGCGATGGTTGTTGTCATTGTGCGGCAACTATCGTATCAAGCTGTTAAGAA  
ATTCACCTCGAAAGCAAGCTGATAACCGATACAATTAAGGCTCCTTTTGGAGCCTTTTTTGGAGATTTTCAACGTGAAAAAATTTATTTTCGCAAT  
TCCTTTAGTTGTTCTTCTATTCTCACTCCGCTGAACTGTTGAAAGTTGTTAGCAAAATCCCATACAGAAAATTCATTTACTAACGTCTGAAAGAC  
GACAAAACCTTTAGATCGTTACGCTAACTAGAGGGCTGTCTGTGGAATGCTACAGGCGTTGATGTTTGTACTGGTGACGAACTCAGTGTACGGTACAT  
GGGTTCTATTGGGCTGCTATCCCTGAAATGAGGGTGGTGGCTCTGAGGGTGGCGGTTCTGAGGGTGGCGGTTCTGAGGGTGGCGGTTACTAAACCTCC  
TGAGTACGGTGATACACCTATTCGGGCTATACTTATATCAACCTCTCGACGGCACTTATCCGCTGGTACTGAGCAAAACCCGCTAATCTAATCCT

(2001 - 3000)

TCTCTTGGAGTCTCAGCCTCTTAATACTTTTCATGTTTCAGAATAATAGTTCCGAAATAGGCAGGGGGCATTAACTGTTTATACGGGCACTGTTACTC  
AAGGCACTGACCCGTTAAAACCTTATTACAGTACACTCTGTATCATCAAAGCATGTATGACGTTACTGGAACGGTAAATTCAGAGACTGCGCTTT  
CCATTTCTGGCTTAAATGAGGATTTATTTGTTTGTGAATATCAAGGCCAATCGTCTGACCTGCCTCAACCTCCTGTCAATGCTGGCGGCGGCTCTGGTGGT  
GGTCTGGTGGCGGCTCTGAGGGTGGTGGCTCTGAGGGTGGCGGTTCTGAGGGTGGCGGCTGAGGGGAGCGGTTCCGGTGGTGGCTCTGGTCCGGT  
ATTTTGTATGAAAAGATGGCAAACGCTAATAAGGGGGCTATGACCGAAAATGCCGATGAAAACGCGCTACAGTCTGACGCTAAAGGCAAACTTGAATC  
TGTCGCTACTGATTACGGTGTCTATCGATGGTTTTCATTGGTACGTTTCCGGCCTTGCTAATGGTAATGGTGTACTGGTATTTGCTGGCTCTAAT  
TCCCAAATGGCTCAAGTGGTACGGTGATAATTCACCTTAAATGAATAATTTCCGTCATATTTACCTTCCCTCCCTCAATCGGTTGAATGTGCGCCTT  
TTGCTTTGGCGCTGGTAAACCATATGAATTTTCTATTGATTGTGACAAAATAAACTTATTCGGTGGTGTCTTTGCGTTCTTTTATATGTTGCCACCTT  
TATGTATGATTTTCTACGTTTCTACATACTGCGTAATAAGGAGTCTTAATCATGCCAGTCTTTTGGGTAATCCGTTATTTAGTTGCTTAACTCGGTT  
TCCTTCTGGTAACTTTGTTTCGGCTATCTGCTTACTTTTCTTAAAAGGGCTTCGGTAAGATAGCTATGCTATTTTATTGTTTCTTGGCTTATTATTGG

(3001-4000)

GCTTAACTCAATTCTTGTGGGTTATCTCTCTGATATTAGCGCTCAATTACCCTCTGACTTTGTTAGGGTGTTCAGTTAATCTCCCGTCTAATGCGCTT  
CCCTGTTTTATGTTATCTCTCTGAAAAGGCTGCTATTTTTCATTTTTCGAGTTAAACAATAAAATCGTTTCTTATTTGGATTGGGATAAATAATAGGCT  
GTTATTTTGTAACTGGCAATTAGGCTCTGGAAGACGCTCGTTAGCGTTGGTAAGATTGAGATAAAATTTAGTGGGTGCAAAATAGCAACTAATC  
TTGATTTAAGGCTTCAAACCTCCCGCAAGTCGGGAGGTTTCGCTAAAACGCTCGCGTTCTTGAATACCGGATAAGCCTTCTATATCTGATTTGCTTGC  
TATTGGGCGCGGTAATGATTCCTACGATGAAAATAAAAACGGCTTGTGTTCTCGATGAGTGCAGTACTTGGTTAATACCCGTTCTTGGAAATGATAAG  
GAAAGACAGCGGATTTAGTATGGTTTCTACATGCTCGTAAATAGGATGGGATATTTTCTTGTTCAGGACTTATCTATTGTTGATAAACAGGCGC  
GTTCTGCATTAGTGAACATGTTGTTTATTGTCGTCTGGACAGAATTAATACCTTTTGTGCGTACTTTATATTCTTATTACTGGCTCGAAAAT  
GCCTCTGCCTAAATACATGTTGGCGTTGTTAAATAGGCGATTCTCAATTAAGCCCTACTGTTGAGCGTTGGCTTTACTGGTAAGAATTTGTATAAC  
GCATATGATACTAAACAGGCTTTTCTAGTAATATGATTCCGTTGTTTATTCTTATTTAACGCTTATTTATCACACGGTGGTATTTCAAACCATTA  
ATTTAGGTGAGAAGATGAAATTAATAAATAATTTGAAAAGTTTCTCGGTTCTTGTCTTGCATTGGATTGTCATCAGCATTACATATAGTTA

(4001-5000)

TATAACCAACCTAAGCCGGAGGTTAAAAGGTAAGTCTCTCAGACCTATGATTTTGATAAATCACTATTGACTTCTCAGCGTCTAATCTAAGCTAT  
CGCTATGTTTTCAAGGATTCTAAGGGAAAATTAATTAATAGCGACGATTTACAGAAGCAAGGTTATTCACCTACATATATTGATTTATGACTGTTTCCA  
TAAAAAAGGTAATTCAAATGAAATGTTAAATGTAATTAATTTGTTTTCTGATGTTGTTTTCATCATCTCTTTTGTCTCAGGTAATGAAATGAATA  
ATTCGCCTCTGCGCGGATTTTGAACCTTGGTATTCAAAGCAATCAGGCGAATCCGTTATTGTTTCTCCCGATGAAAAGGTAAGTACTGTTACTGATTTCCATC  
TGACGTTAAACCTGAAAATCTACGCAATTTCTTTATTTCTGTTTTACGTGCAAAATATTTGATATGGTAGGTTCTAACCTTCCATTATTCAGAAGTAT  
AATCCAAACAATCAGGATTATATTGATGAATGCCATCATCTGATAATCAGGAATATGATGATAATCCGCTCCTTCTGGTGGTTCTTTGTTCCGCAAA  
ATGATAATGTTACTCAAACCTTTAAAATTAATAACGTTTCGGGCAAGGATTTAATACGAGTTGTCGAATGTTTGTAAAGTCTAATCTTCTAAATCCTC  
AAATGATTTATCTATTGACGGCTCTAATCTATTAGTTGTTAGTGCTCCAAAAGATATTTAGATAACCTTCCCAATTCCTTCAACTGTTGATTTCCCA  
ACTGACCAGATATTGATTGAGGGTTGATATTGAGGTTACGAAAGGTGATGCTTTAGATTTTCTTATTGCTGCTGGCTCTCAGCGTGGCACTGTTGCAG  
GCGGTGTTAATACTGACCGCTCACCTCTGTTTTATCTTCTGCTGGTGGTTCGTTCCGATTTTTAATGGCGATGTTTTAGGGCTATCAGTTCCGCAAT

(5001-6000)

AAAGACTAATAGCCATTCAAAAATATTGTCTGTGCCACGTATTCTACGCTTTCAGGTCAGAAGGTTCTATCTCTGTTGGCCAGAATGTCCCTTTTATT  
ACTGGTCGTGTGACTGGTGAATCTGCCAATGTAATAATCCATTTACAGACGATTGAGCGTCAAATGTAGGTATTTCCATGAGCGTTTTCTCTGTTGCAA  
TGGCTGGCGGTAATATTGTTCTGGATATTACCAGCAAGGCCGATAGTTTGAGTTCTTCTACTCAGGCAAGTGATGTTTACTAATAAAGAAGTATTGC  
TACAACGGTTAATTTGCGTGATGGACAGACTTTTTACTCGGTGGCCTCACTGATTATAAAAAACACTTCTCAGGATTTGCGGTACCGTTCTGTCTAAA  
ATCCCTTTAATCGGCCTCTGTTAGCTCCCGCTCTGATTCTAACGAGGAAAGCACGTTATACGTGCTCGTCAAAGCAACCATAGTACGCGCCTGTAGC  
GGCGCATTAAAGCGGGCGGGTGTGGTGGTTACGCGCAGCGTGACCGCTACACTTGCAGCGCCCTAGCGCCCGCTCTTTGCTTTCTTCCCTTCTTTTC  
TCGCCACGTTTCGCCGGCTTTCCCGTCAAGCTCTAAATCGGGGGCTCCCTTTAGGGTCCGATTTAGTGCTTTACGGCACCTCGACCCCAAAAACCTGA  
TTTGGGTGATGGTTCACGTAGTGGGCCATCGCCCTGATAGACGGTTTTTTCGCCCTTTGACGTTGGAGTCCACGTTCTTAATAGTGGACTCTTGTCCAA  
ACTGGAACAACACTCAACCCTATCTCGGGCTATTCTTTTGATTTATAAGGGATTTTGCCGATTTTCGGAACCACCATCAAACAGGATTTTCGCCCTGCTGGG  
GCAAACACGCTGGACCCTTGTGCAACTCTCTCAGGGCCAGGCGGTGAAGGGCAATCAGCTGTTGCCCGTCTCACTGGTGAAGAAAACACCCCTG

(6001-7000)

GCGCCCAATACGCAAACCGCTCTCCCGCGCGTTGGCCGATTCATTAATGCAGCTGGCACGACAGGTTTCCCGACTGGAAAGCGGGCAGTGAGCGCAAC  
GCAATTAATGTGAGTTAGCTCACTCATTAGGCACCCAGGCTTTACACTTTATGCTTCCGGCTCGTATGTTGTGTGGAATTGTGAGCGGATAACAATTT  
ACACAGGAAACAGCTATGACCATGATTACGAATTCGAGCTCGGTACCCGGGGATCCTCTAGAGTCGACCTGCAGGCATGCAAGCTTGGCACTGGCCGTCG  
TTTTACAACGTCGTGACTGGGAAAACCTGGCGTTACCCAACCTAATCGCCTTGACGACATCCCCCTTTCCGCCAGCTGGCGTAATAGCGAAGAGGCCCG  
CACCGATCGCCCTTCCCAACAGTTGCGCAGCCTGAATGGCGAATGGCGCTTTGCTGGTTTCCGGCACCAGAAGCGGTGCGGAAAGCTGGCTGGAGTGC  
GATCTTCTGAGGCCGATACTGTCTGTCGTCCTCCCTCAAACCTGGCAGATGCACGGTTACGATGCGCCCATCTACACCAACGTGACCTATCCATTACGGTCA  
ATCCGCGCTTTGTTCCACGGAGAATCCGACGGGTGTTACTCGCTCACATTTAATGTTGATGAAAGCTGGCTACAGGAAGGCCAGACGCGAATTTTT  
TGATGGCGTTCCTATTGGTTAAAAAATGAGCTGATTTAACAAAAATTTAATGCGAATTTTAAACAAAATATTAACGTTTACAATTTAAATTTGCTTATA  
CAATCTTCTGTTTTTGGGGCTTTTCTGATTATCAACCGGGGTACATATGATTGACATGCTAGTTTTACGATTACCGTTTCATCGATTCTCTTGTGCTC  
CAGACTCTCAGGCAATGACCTGATAGCCTTGTAGATCTCTCAAAAATAGCTACCCTCCTCCGCATTAATTTATCAGCTAGAACGGTTGAATATCATATT

(7001-7249)

GATGGTGATTTGACTGTCTCCGGCCTTTCTCACCTTTTGAATCTTTACCTACACATTACTCAGGCATTGCATTTAAAAATATAGAGGGTTCTAAAAAT  
TTTATCCTTGCCTTGAATAAAGGCTTCTCCGCAAAAGTATTACAGGGTCATAATGTTTTGGTACAACCGATTTAGCTTTATGCTCTGAGGCTTTATT  
GCTTAATTTTGCTAATCTTTGCCCTTGCCTGTATGATTTATTGGATGTT

**Table S18. Data collection and processing for the cryo-EM imaging and 3D reconstructions.**

|                                      | FV              |                 |                 | MV              |                 |                 |
|--------------------------------------|-----------------|-----------------|-----------------|-----------------|-----------------|-----------------|
|                                      | Tet84           | Oct84           | Tet63           | Tet84           | Tet84*          | Oct84           |
| <b>Microscope</b>                    | Titan Krios     | JEOL 3200       | JEOL 3200       | Titan Krios     | Titan Krios     | JEOL 3200       |
| <b>Voltage (kV)</b>                  | 300             | 300             | 300             | 300             | 300             | 300             |
| <b>Camera</b>                        | Gatan K2 Summit |
| <b>Pixel size (Å)</b>                | 1.77            | 2.4             | 2.4             | 1.77            | 1.77            | 2.4             |
| <b>Total dose (e-/Å<sup>2</sup>)</b> | 42.4            | 40.8            | 40.8            | 42.4            | 42.4            | 40.8            |
| <b>Number of micrographs</b>         | 96              | 724             | 662             | 119             | 85              | 657             |
| <b>Number of final particles</b>     | 1,669           | 3,308           | 2,511           | 1,092           | 586             | 5,705           |
| <b>Symmetry</b>                      | Tetra-hedron    | Octa-hedron     | Tetra-hedron    | Tetra-hedron    | Tetra-hedron    | Octa-hedron     |
| <b>Resolution (0.143 FSC, Å)</b>     | 21              | 18              | 17.5            | 25              | 24              | 15.3            |

The Tet84\* used the middle connection layer.
